# Supplementary material for: Lamin A/C-promoter interactions specify chromatin state–dependent transcription outcomes
Source: HighWire-hosted journal article supplement (doi:10.1101/gr.159400.113), 2013-07-16
Supplement: Supplemental_Table_S1.xlsx [file Supplemental_Table_S1.xlsx]

## Sheet: LMNA-bound genes ASCs
Table S1. Genes enriched in LMNA in ASCs
A2M	alpha-2-macroglobulin
A2ML1	alpha-2-macroglobulin-like 1
A4GNT	alpha-1,4-N-acetylglucosaminyltransferase
AACSP1	acetoacetyl-CoA synthetase pseudogene 1
AADAC	arylacetamide deacetylase
AADACL3	arylacetamide deacetylase-like 3
AADACL4	arylacetamide deacetylase-like 4
AADAT	aminoadipate aminotransferase
AAED1	AhpC/TSA antioxidant enzyme domain containing 1
AASDH	aminoadipate-semialdehyde dehydrogenase
ABAT	4-aminobutyrate aminotransferase
ABCA1	ATP-binding cassette, sub-family A (ABC1), member 1
ABCA12	ATP-binding cassette, sub-family A (ABC1), member 12
ABCA2	ATP-binding cassette, sub-family A (ABC1), member 2
ABCA5	ATP-binding cassette, sub-family A (ABC1), member 5
ABCB1	ATP-binding cassette, sub-family B (MDR/TAP), member 1
ABCB11	ATP-binding cassette, sub-family B (MDR/TAP), member 11
ABCB5	ATP-binding cassette, sub-family B (MDR/TAP), member 5
ABCB8	ATP-binding cassette, sub-family B (MDR/TAP), member 8
ABCC11	ATP-binding cassette, sub-family C (CFTR/MRP), member 11
ABCC12	ATP-binding cassette, sub-family C (CFTR/MRP), member 12
ABCC13	ATP-binding cassette, sub-family C (CFTR/MRP), member 13, pseudogene
ABCC6	ATP-binding cassette, sub-family C (CFTR/MRP), member 6
ABCC6P1	ATP-binding cassette, sub-family C, member 6 pseudogene 1
ABCC6P2	ATP-binding cassette, sub-family C, member 6 pseudogene 2
ABCG1	ATP-binding cassette, sub-family G (WHITE), member 1
ABCG4	ATP-binding cassette, sub-family G (WHITE), member 4
ABCG5	ATP-binding cassette, sub-family G (WHITE), member 5
ABCG8	ATP-binding cassette, sub-family G (WHITE), member 8
ABHD3	abhydrolase domain containing 3
ABLIM1	actin binding LIM protein 1
ABP1	amiloride binding protein 1 (amine oxidase (copper-containing))
ABRA	actin-binding Rho activating protein
ACACB	acetyl-CoA carboxylase beta
ACCSL	1-aminocyclopropane-1-carboxylate synthase homolog (Arabidopsis)(non-functional)-like
ACE	angiotensin I converting enzyme (peptidyl-dipeptidase A) 1
ACE2	angiotensin I converting enzyme (peptidyl-dipeptidase A) 2
ACOT11	acyl-CoA thioesterase 11
ACOT9	acyl-CoA thioesterase 9
ACOX2	acyl-CoA oxidase 2, branched chain
ACOXL	acyl-CoA oxidase-like
ACPL2	acid phosphatase-like 2
ACPP	acid phosphatase, prostate
ACPT	acid phosphatase, testicular
ACR	acrosin
ACRV1	acrosomal vesicle protein 1
ACSBG1	acyl-CoA synthetase bubblegum family member 1
ACSBG2	acyl-CoA synthetase bubblegum family member 2
ACSM1	acyl-CoA synthetase medium-chain family member 1
ACSM2A	acyl-CoA synthetase medium-chain family member 2A
ACSM2B	acyl-CoA synthetase medium-chain family member 2B
ACSM3	acyl-CoA synthetase medium-chain family member 3
ACSM4	acyl-CoA synthetase medium-chain family member 4
ACSM5	acyl-CoA synthetase medium-chain family member 5
ACSS3	acyl-CoA synthetase short-chain family member 3
ACTA1	actin, alpha 1, skeletal muscle
ACTG1P4	actin, gamma 1 pseudogene 4
ACTG2	actin, gamma 2, smooth muscle, enteric
ACTL7A	actin-like 7A
ACTL7B	actin-like 7B
ACTL8	actin-like 8
ACTL9	actin-like 9
ACTRT1	actin-related protein T1
ACVR1C	activin A receptor, type IC
ACY3	aspartoacylase (aminocyclase) 3
ADAM18	ADAM metallopeptidase domain 18
ADAM2	ADAM metallopeptidase domain 2
ADAM20	ADAM metallopeptidase domain 20
ADAM21	ADAM metallopeptidase domain 21
ADAM21P1	ADAM metallopeptidase domain 21 pseudogene 1
ADAM29	ADAM metallopeptidase domain 29
ADAM5	ADAM metallopeptidase domain 5, pseudogene
ADAM6	ADAM metallopeptidase domain 6, pseudogene
ADAM7	ADAM metallopeptidase domain 7
ADAMDEC1	ADAM-like, decysin 1
ADAMTS20	ADAM metallopeptidase with thrombospondin type 1 motif, 20
ADARB2	adenosine deaminase, RNA-specific, B2
ADARB2-AS1	ADARB2 antisense RNA 1
ADCY10	adenylate cyclase 10 (soluble)
ADH1A	alcohol dehydrogenase 1A (class I), alpha polypeptide
ADH1B	alcohol dehydrogenase 1B (class I), beta polypeptide
ADH1C	alcohol dehydrogenase 1C (class I), gamma polypeptide
ADH7	alcohol dehydrogenase 7 (class IV), mu or sigma polypeptide
ADIG	adipogenin
ADM2	adrenomedullin 2
ADORA3	adenosine A3 receptor
ADSS	adenylosuccinate synthase
ADSSL1	adenylosuccinate synthase like 1
ADTRP	androgen-dependent TFPI-regulating protein
AFF3	AF4/FMR2 family, member 3
AFG3L1P	AFG3 ATPase family gene 3-like 1 (S. cerevisiae), pseudogene
AGA	aspartylglucosaminidase
AGBL1	ATP/GTP binding protein-like 1
AGGF1	angiogenic factor with G patch and FHA domains 1
AGMAT	agmatine ureohydrolase (agmatinase)
AGPAT4-IT1	AGPAT4 intronic transcript 1 (non-protein coding)
AGR2	anterior gradient 2 homolog (Xenopus laevis)
AGT	angiotensinogen (serpin peptidase inhibitor, clade A, member 8)
AGXT	alanine-glyoxylate aminotransferase
AHCYL2	adenosylhomocysteinase-like 2
AHDC1	AT hook, DNA binding motif, containing 1
AHNAK2	AHNAK nucleoprotein 2
AHRR	aryl-hydrocarbon receptor repressor
AHSA2	AHA1, activator of heat shock 90kDa protein ATPase homolog 2 (yeast)
AHSG	alpha-2-HS-glycoprotein
AICDA	activation-induced cytidine deaminase
AIFM1	apoptosis-inducing factor, mitochondrion-associated, 1
AIM1L	absent in melanoma 1-like
AIM2	absent in melanoma 2
AIRE	autoimmune regulator
AJUBA	ajuba LIM protein
AKAP1	A kinase (PRKA) anchor protein 1
AKAP6	A kinase (PRKA) anchor protein 6
AKAP7	A kinase (PRKA) anchor protein 7
AKNA	AT-hook transcription factor
AKNAD1	AKNA domain containing 1
AKR1B15	aldo-keto reductase family 1, member B15
AKR1CL1	aldo-keto reductase family 1, member C-like 1
AKR1D1	aldo-keto reductase family 1, member D1 (delta 4-3-ketosteroid-5-beta-reductase)
AKT1	v-akt murine thymoma viral oncogene homolog 1
ALAS2	aminolevulinate, delta-, synthase 2
ALDH1A1	aldehyde dehydrogenase 1 family, member A1
ALDH1A2	aldehyde dehydrogenase 1 family, member A2
ALDH1L1	aldehyde dehydrogenase 1 family, member L1
ALDH3A1	aldehyde dehydrogenase 3 family, member A1
ALDH3B2	aldehyde dehydrogenase 3 family, member B2
ALDOB	aldolase B, fructose-bisphosphate
ALDOC	aldolase C, fructose-bisphosphate
ALG1L2	asparagine-linked glycosylation 1-like 2
ALKBH3	alkB, alkylation repair homolog 3 (E. coli)
ALKBH6	alkB, alkylation repair homolog 6 (E. coli)
ALLC	allantoicase
ALMS1P	Alstrom syndrome 1 pseudogene
ALOX12B	arachidonate 12-lipoxygenase, 12R type
ALOX12P2	arachidonate 12-lipoxygenase pseudogene 2
ALPI	alkaline phosphatase, intestinal
ALPK3	alpha-kinase 3
ALPP	alkaline phosphatase, placental
AMICA1	adhesion molecule, interacts with CXADR antigen 1
AMY1A	amylase, alpha 1A (salivary)
AMY1B	amylase, alpha 1B (salivary)
AMY1C	amylase, alpha 1C (salivary)
AMY2A	amylase, alpha 2A (pancreatic)
ANAPC7	anaphase promoting complex subunit 7
ANGPT4	angiopoietin 4
ANGPTL2	angiopoietin-like 2
ANGPTL6	angiopoietin-like 6
ANK2	ankyrin 2, neuronal
ANKK1	ankyrin repeat and kinase domain containing 1
ANKRD18DP	ankyrin repeat domain 18D, pseudogene
ANKRD20A4	ankyrin repeat domain 20 family, member A4
ANKRD26P1	ankyrin repeat domain 26 pseudogene 1
ANKRD26P3	ankyrin repeat domain 26 pseudogene 3
ANKRD30B	ankyrin repeat domain 30B
ANKRD30BL	ankyrin repeat domain 30B-like
ANKRD30BP2	ankyrin repeat domain 30B pseudogene 2
ANKRD35	ankyrin repeat domain 35
ANKRD36B	ankyrin repeat domain 36B
ANKRD44	ankyrin repeat domain 44
ANKRD45	ankyrin repeat domain 45
ANKRD7	ankyrin repeat domain 7
ANKS1B	ankyrin repeat and sterile alpha motif domain containing 1B
ANKS4B	ankyrin repeat and sterile alpha motif domain containing 4B
ANO3	anoctamin 3
ANO5	anoctamin 5
ANO9	anoctamin 9
ANP32AP1	acidic (leucine-rich) nuclear phosphoprotein 32 family, member A pseudogene 1
ANP32C	acidic (leucine-rich) nuclear phosphoprotein 32 family, member C
ANP32D	acidic (leucine-rich) nuclear phosphoprotein 32 family, member D
ANXA2P2	annexin A2 pseudogene 2
ANXA2P3	annexin A2 pseudogene 3
AOAH	acyloxyacyl hydrolase (neutrophil)
AOC2	amine oxidase, copper containing 2 (retina-specific)
AOC4	amine oxidase, copper containing 3 (vascular adhesion protein 1) pseudogene
APBA1	amyloid beta (A4) precursor protein-binding, family A, member 1
APBA2	amyloid beta (A4) precursor protein-binding, family A, member 2
APCDD1	adenomatosis polyposis coli down-regulated 1
APCS	amyloid P component, serum
APEX2	APEX nuclease (apurinic/apyrimidinic endonuclease) 2
API5	apoptosis inhibitor 5
APLNR	apelin receptor
APOB	apolipoprotein B (including Ag(x) antigen)
APOBEC2	apolipoprotein B mRNA editing enzyme, catalytic polypeptide-like 2
APOBEC3A	apolipoprotein B mRNA editing enzyme, catalytic polypeptide-like 3A
APOBEC3C	apolipoprotein B mRNA editing enzyme, catalytic polypeptide-like 3C
APOBEC3F	apolipoprotein B mRNA editing enzyme, catalytic polypeptide-like 3F
APOBEC3G	apolipoprotein B mRNA editing enzyme, catalytic polypeptide-like 3G
APOBEC4	apolipoprotein B mRNA editing enzyme, catalytic polypeptide-like 4 (putative)
APOC1	apolipoprotein C-I
APOC2	apolipoprotein C-II
APOC4	apolipoprotein C-IV
APOD	apolipoprotein D
APOL1	apolipoprotein L, 1
APOL3	apolipoprotein L, 3
APOL4	apolipoprotein L, 4
APP	amyloid beta (A4) precursor protein
AQP1	aquaporin 1 (Colton blood group)
AQP10	aquaporin 10
AQP12B	aquaporin 12B
AQP4	aquaporin 4
AQP6	aquaporin 6, kidney specific
AQP7	aquaporin 7
AQP7P1	aquaporin 7 pseudogene 1
AQP7P2	aquaporin 7 pseudogene 2
AQP8	aquaporin 8
AQP9	aquaporin 9
AR	androgen receptor
ARF5	ADP-ribosylation factor 5
ARFIP2	ADP-ribosylation factor interacting protein 2
ARGFX	arginine-fifty homeobox
ARHGAP15	Rho GTPase activating protein 15
ARHGAP25	Rho GTPase activating protein 25
ARHGAP27	Rho GTPase activating protein 27
ARHGAP32	Rho GTPase activating protein 32
ARHGAP9	Rho GTPase activating protein 9
ARHGDIB	Rho GDP dissociation inhibitor (GDI) beta
ARHGEF3	Rho guanine nucleotide exchange factor (GEF) 3
ARHGEF33	Rho guanine nucleotide exchange factor (GEF) 33
ARHGEF38	Rho guanine nucleotide exchange factor (GEF) 38
ARHGEF6	Rac/Cdc42 guanine nucleotide exchange factor (GEF) 6
ARHGEF7	Rho guanine nucleotide exchange factor (GEF) 7
ARMC10	armadillo repeat containing 10
ARMC8	armadillo repeat containing 8
ARMCX2	armadillo repeat containing, X-linked 2
ARMCX6	armadillo repeat containing, X-linked 6
ARPP21	cAMP-regulated phosphoprotein, 21kDa
ARR3	arrestin 3, retinal (X-arrestin)
ARSE	arylsulfatase E (chondrodysplasia punctata 1)
ARSF	arylsulfatase F
ARSH	arylsulfatase family, member H
ART3	ADP-ribosyltransferase 3
ASAH2	N-acylsphingosine amidohydrolase (non-lysosomal ceramidase) 2
ASB10	ankyrin repeat and SOCS box containing 10
ASB12	ankyrin repeat and SOCS box containing 12
ASB14	ankyrin repeat and SOCS box containing 14
ASB15	ankyrin repeat and SOCS box containing 15
ASB18	ankyrin repeat and SOCS box containing 18
ASB9	ankyrin repeat and SOCS box containing 9
ASGR2	asialoglycoprotein receptor 2
ASIC2	acid-sensing (proton-gated) ion channel 2
ASIP	agouti signaling protein
ASMT	acetylserotonin O-methyltransferase
ASPG	asparaginase homolog (S. cerevisiae)
ASTN2	astrotactin 2
ASXL2	additional sex combs like 2 (Drosophila)
ATAT1	alpha tubulin acetyltransferase 1
ATF7IP2	activating transcription factor 7 interacting protein 2
ATG9B	autophagy related 9B
ATL2	atlastin GTPase 2
ATN1	atrophin 1
ATP10B	ATPase, class V, type 10B
ATP13A4	ATPase type 13A4
ATP13A5	ATPase type 13A5
ATP1A3	ATPase, Na+/K+ transporting, alpha 3 polypeptide
ATP1A4	ATPase, Na+/K+ transporting, alpha 4 polypeptide
ATP1B4	ATPase, Na+/K+ transporting, beta 4 polypeptide
ATP2A1	ATPase, Ca++ transporting, cardiac muscle, fast twitch 1
ATP2A3	ATPase, Ca++ transporting, ubiquitous
ATP2B3	ATPase, Ca++ transporting, plasma membrane 3
ATP4A	ATPase, H+/K+ exchanging, alpha polypeptide
ATP5EP2	ATP synthase, H+ transporting, mitochondrial F1 complex, epsilon subunit pseudogene 2
ATP5G3	ATP synthase, H+ transporting, mitochondrial Fo complex, subunit C3 (subunit 9)
ATP6V0A4	ATPase, H+ transporting, lysosomal V0 subunit a4
ATP6V1B2	ATPase, H+ transporting, lysosomal 56/58kDa, V1 subunit B2
ATP6V1E2	ATPase, H+ transporting, lysosomal 31kDa, V1 subunit E2
ATP6V1G2	ATPase, H+ transporting, lysosomal 13kDa, V1 subunit G2
ATP7A	ATPase, Cu++ transporting, alpha polypeptide
ATP8B5P	ATPase, class I, type 8B, member 5, pseudogene
ATPAF1	ATP synthase mitochondrial F1 complex assembly factor 1
ATPAF1-AS1	ATPAF1 antisense RNA 1
AUNIP	aurora kinase A and ninein interacting protein
AURKAPS1	aurora kinase A pseudogene 1
AURKC	aurora kinase C
AVPR2	arginine vasopressin receptor 2
AWAT1	acyl-CoA wax alcohol acyltransferase 1
AXL	AXL receptor tyrosine kinase
AZGP1	alpha-2-glycoprotein 1, zinc-binding
AZI1	5-azacytidine induced 1
B3GALT1	UDP-Gal:betaGlcNAc beta 1,3-galactosyltransferase, polypeptide 1
B3GALT5	UDP-Gal:betaGlcNAc beta 1,3-galactosyltransferase, polypeptide 5
B3GAT1	beta-1,3-glucuronyltransferase 1 (glucuronosyltransferase P)
B3GAT2	beta-1,3-glucuronyltransferase 2 (glucuronosyltransferase S)
BAAT	bile acid CoA: amino acid N-acyltransferase (glycine N-choloyltransferase)
BACE2	beta-site APP-cleaving enzyme 2
BAGE	B melanoma antigen
BAGE2	B melanoma antigen family, member 2
BAGE3	B melanoma antigen family, member 3
BAGE4	B melanoma antigen family, member 4
BAGE5	B melanoma antigen family, member 5
BAI1	brain-specific angiogenesis inhibitor 1
BANF2	barrier to autointegration factor 2
BATF	basic leucine zipper transcription factor, ATF-like
BBOX1	butyrobetaine (gamma), 2-oxoglutarate dioxygenase (gamma-butyrobetaine hydroxylase) 1
BCAS1	breast carcinoma amplified sequence 1
BCDIN3D-AS1	BCDIN3D antisense RNA 1
BCHE	butyrylcholinesterase
BCL2L14	BCL2-like 14 (apoptosis facilitator)
BCRP3	breakpoint cluster region pseudogene 3
BCYRN1	brain cytoplasmic RNA 1
BDH1	3-hydroxybutyrate dehydrogenase, type 1
BEND2	BEN domain containing 2
BEND4	BEN domain containing 4
BEND7	BEN domain containing 7
BEX5	brain expressed, X-linked 5
BFSP2	beaded filament structural protein 2, phakinin
BHLHB9	basic helix-loop-helix domain containing, class B, 9
BICD1	bicaudal D homolog 1 (Drosophila)
BIN3	bridging integrator 3
BLCAP	bladder cancer associated protein
BLK	B lymphoid tyrosine kinase
BLMH	bleomycin hydrolase
BLNK	B-cell linker
BMP10	bone morphogenetic protein 10
BMP15	bone morphogenetic protein 15
BMP3	bone morphogenetic protein 3
BMS1	BMS1 homolog, ribosome assembly protein (yeast)
BMX	BMX non-receptor tyrosine kinase
BNIPL	BCL2/adenovirus E1B 19kD interacting protein like
BPESC1	blepharophimosis, epicanthus inversus and ptosis, candidate 1 (non-protein coding)
BPIFA1	BPI fold containing family A, member 1
BPIFA2	BPI fold containing family A, member 2
BPIFA3	BPI fold containing family A, member 3
BPIFB1	BPI fold containing family B, member 1
BPIFB2	BPI fold containing family B, member 2
BPIFB3	BPI fold containing family B, member 3
BPIFB4	BPI fold containing family B, member 4
BPIFB6	BPI fold containing family B, member 6
BPIFC	BPI fold containing family C
BRCA1	breast cancer 1, early onset
BRDT	bromodomain, testis-specific
BREA2	breast cancer estrogen-induced apoptosis 2
BRS3	bombesin-like receptor 3
BRSK1	BR serine/threonine kinase 1
BRSK2	BR serine/threonine kinase 2
BST2	bone marrow stromal cell antigen 2
BTBD11	BTB (POZ) domain containing 11
BTBD16	BTB (POZ) domain containing 16
BTBD17	BTB (POZ) domain containing 17
BTC	betacellulin
BTF3P11	basic transcription factor 3 pseudogene 11
BTG2	BTG family, member 2
BTK	Bruton agammaglobulinemia tyrosine kinase
BTN1A1	butyrophilin, subfamily 1, member A1
BTN2A2	butyrophilin, subfamily 2, member A2
BTNL2	butyrophilin-like 2 (MHC class II associated)
BTNL3	butyrophilin-like 3
BTNL8	butyrophilin-like 8
BTNL9	butyrophilin-like 9
BUD13	BUD13 homolog (S. cerevisiae)
BZRAP1	benzodiazapine receptor (peripheral) associated protein 1
C10orf113	chromosome 10 open reading frame 113
C10orf120	chromosome 10 open reading frame 120
C10orf129	chromosome 10 open reading frame 129
C10orf40	chromosome 10 open reading frame 40
C10orf53	chromosome 10 open reading frame 53
C10orf71	chromosome 10 open reading frame 71
C10orf88	chromosome 10 open reading frame 88
C10orf91	chromosome 10 open reading frame 91
C10orf99	chromosome 10 open reading frame 99
C11orf31	chromosome 11 open reading frame 31
C11orf34	chromosome 11 open reading frame 34
C11orf40	chromosome 11 open reading frame 40
C11orf42	chromosome 11 open reading frame 42
C11orf53	chromosome 11 open reading frame 53
C11orf75	chromosome 11 open reading frame 75
C12orf36	chromosome 12 open reading frame 36
C12orf40	chromosome 12 open reading frame 40
C12orf45	chromosome 12 open reading frame 45
C12orf5	chromosome 12 open reading frame 5
C12orf54	chromosome 12 open reading frame 54
C12orf69	chromosome 12 open reading frame 69
C12orf74	chromosome 12 open reading frame 74
C13orf35	chromosome 13 open reading frame 35
C14orf101	chromosome 14 open reading frame 101
C14orf118	chromosome 14 open reading frame 118
C14orf166B	chromosome 14 open reading frame 166B
C14orf177	chromosome 14 open reading frame 177
C14orf182	chromosome 14 open reading frame 182
C14orf23	chromosome 14 open reading frame 23
C14orf64	chromosome 14 open reading frame 64
C15orf32	chromosome 15 open reading frame 32
C15orf41	chromosome 15 open reading frame 41
C15orf43	chromosome 15 open reading frame 43
C15orf60	chromosome 15 open reading frame 60
C15orf63	chromosome 15 open reading frame 63
C16orf78	chromosome 16 open reading frame 78
C16orf90	chromosome 16 open reading frame 90
C17orf101	chromosome 17 open reading frame 101
C17orf47	chromosome 17 open reading frame 47
C17orf66	chromosome 17 open reading frame 66
C17orf67	chromosome 17 open reading frame 67
C17orf74	chromosome 17 open reading frame 74
C17orf77	chromosome 17 open reading frame 77
C17orf85	chromosome 17 open reading frame 85
C17orf97	chromosome 17 open reading frame 97
C18orf26	chromosome 18 open reading frame 26
C18orf56	chromosome 18 open reading frame 56
C18orf62	chromosome 18 open reading frame 62
C18orf8	chromosome 18 open reading frame 8
C19orf18	chromosome 19 open reading frame 18
C19orf45	chromosome 19 open reading frame 45
C19orf48	chromosome 19 open reading frame 48
C19orf69	chromosome 19 open reading frame 69
C19orf80	chromosome 19 open reading frame 80
C1orf100	chromosome 1 open reading frame 100
C1orf110	chromosome 1 open reading frame 110
C1orf111	chromosome 1 open reading frame 111
C1orf123	chromosome 1 open reading frame 123
C1orf126	chromosome 1 open reading frame 126
C1orf141	chromosome 1 open reading frame 141
C1orf146	chromosome 1 open reading frame 146
C1orf158	chromosome 1 open reading frame 158
C1orf162	chromosome 1 open reading frame 162
C1orf186	chromosome 1 open reading frame 186
C1orf198	chromosome 1 open reading frame 198
C1orf210	chromosome 1 open reading frame 210
C1orf226	chromosome 1 open reading frame 226
C1orf68	chromosome 1 open reading frame 68
C1orf74	chromosome 1 open reading frame 74
C1orf87	chromosome 1 open reading frame 87
C1orf88	chromosome 1 open reading frame 88
C1orf95	chromosome 1 open reading frame 95
C1QB	complement component 1, q subcomponent, B chain
C1QL4	complement component 1, q subcomponent-like 4
C1QTNF7	C1q and tumor necrosis factor related protein 7
C1S	complement component 1, s subcomponent
C2	complement component 2
C20orf112	chromosome 20 open reading frame 112
C20orf118	chromosome 20 open reading frame 118
C20orf141	chromosome 20 open reading frame 141
C20orf152	chromosome 20 open reading frame 152
C20orf173	chromosome 20 open reading frame 173
C20orf197	chromosome 20 open reading frame 197
C20orf202	chromosome 20 open reading frame 202
C20orf79	chromosome 20 open reading frame 79
C20orf85	chromosome 20 open reading frame 85
C21orf15	chromosome 21 open reading frame 15
C21orf2	chromosome 21 open reading frame 2
C21orf54	chromosome 21 open reading frame 54
C21orf59	chromosome 21 open reading frame 59
C21orf62	chromosome 21 open reading frame 62
C22orf28	chromosome 22 open reading frame 28
C22orf31	chromosome 22 open reading frame 31
C22orf42	chromosome 22 open reading frame 42
C22orf43	chromosome 22 open reading frame 43
C2orf27A	chromosome 2 open reading frame 27A
C2orf27B	chromosome 2 open reading frame 27B
C2orf40	chromosome 2 open reading frame 40
C2orf44	chromosome 2 open reading frame 44
C2orf48	chromosome 2 open reading frame 48
C2orf53	chromosome 2 open reading frame 53
C2orf57	chromosome 2 open reading frame 57
C2orf62	chromosome 2 open reading frame 62
C2orf66	chromosome 2 open reading frame 66
C2orf71	chromosome 2 open reading frame 71
C2orf78	chromosome 2 open reading frame 78
C2orf80	chromosome 2 open reading frame 80
C2orf83	chromosome 2 open reading frame 83
C2orf88	chromosome 2 open reading frame 88
C2orf90	chromosome 2 open reading frame 90
C3	complement component 3
C3orf15	chromosome 3 open reading frame 15
C3orf32	chromosome 3 open reading frame 32
C3orf35	chromosome 3 open reading frame 35
C3orf52	chromosome 3 open reading frame 52
C3orf79	chromosome 3 open reading frame 79
C3P1	complement component 3 precursor pseudogene
C4A	complement component 4A (Rodgers blood group)
C4B	complement component 4B (Chido blood group)
C4BPA	complement component 4 binding protein, alpha
C4orf19	chromosome 4 open reading frame 19
C4orf27	chromosome 4 open reading frame 27
C4orf40	chromosome 4 open reading frame 40
C5AR1	complement component 5a receptor 1
C5orf25	chromosome 5 open reading frame 25
C5orf30	chromosome 5 open reading frame 30
C5orf34	chromosome 5 open reading frame 34
C5orf46	chromosome 5 open reading frame 46
C5orf58	chromosome 5 open reading frame 58
C5orf64	chromosome 5 open reading frame 64
C6	complement component 6
C6orf118	chromosome 6 open reading frame 118
C6orf123	chromosome 6 open reading frame 123
C6orf164	chromosome 6 open reading frame 164
C6orf203	chromosome 6 open reading frame 203
C7	complement component 7
C7orf29	chromosome 7 open reading frame 29
C7orf34	chromosome 7 open reading frame 34
C7orf49	chromosome 7 open reading frame 49
C7orf62	chromosome 7 open reading frame 62
C7orf66	chromosome 7 open reading frame 66
C7orf71	chromosome 7 open reading frame 71
C8A	complement component 8, alpha polypeptide
C8B	complement component 8, beta polypeptide
C8orf4	chromosome 8 open reading frame 4
C8orf42	chromosome 8 open reading frame 42
C8orf58	chromosome 8 open reading frame 58
C8orf74	chromosome 8 open reading frame 74
C9orf11	chromosome 9 open reading frame 11
C9orf135	chromosome 9 open reading frame 135
C9orf152	chromosome 9 open reading frame 152
C9orf163	chromosome 9 open reading frame 163
C9orf24	chromosome 9 open reading frame 24
C9orf66	chromosome 9 open reading frame 66
CA1	carbonic anhydrase I
CA6	carbonic anhydrase VI
CABIN1	calcineurin binding protein 1
CABP4	calcium binding protein 4
CABP5	calcium binding protein 5
CABS1	calcium-binding protein, spermatid-specific 1
CACNA1B	calcium channel, voltage-dependent, N type, alpha 1B subunit
CACNA1I	calcium channel, voltage-dependent, T type, alpha 1I subunit
CACNB2	calcium channel, voltage-dependent, beta 2 subunit
CACNB4	calcium channel, voltage-dependent, beta 4 subunit
CACNG1	calcium channel, voltage-dependent, gamma subunit 1
CACNG3	calcium channel, voltage-dependent, gamma subunit 3
CACNG5	calcium channel, voltage-dependent, gamma subunit 5
CACNG8	calcium channel, voltage-dependent, gamma subunit 8
CADM3	cell adhesion molecule 3
CALB1	calbindin 1, 28kDa
CALCA	calcitonin-related polypeptide alpha
CALCR	calcitonin receptor
CALN1	calneuron 1
CALR	calreticulin
CALY	calcyon neuron-specific vesicular protein
CAMK1G	calcium/calmodulin-dependent protein kinase IG
CAMP	cathelicidin antimicrobial peptide
CAPN11	calpain 11
CAPN12	calpain 12
CAPN13	calpain 13
CAPN14	calpain 14
CAPN6	calpain 6
CAPN8	calpain 8
CAPN9	calpain 9
CAPSL	calcyphosine-like
CARD11	caspase recruitment domain family, member 11
CARD14	caspase recruitment domain family, member 14
CARD16	caspase recruitment domain family, member 16
CARD17	caspase recruitment domain family, member 17
CARD18	caspase recruitment domain family, member 18
CARNS1	carnosine synthase 1
CARS	cysteinyl-tRNA synthetase
CARTPT	CART prepropeptide
CASP1	caspase 1, apoptosis-related cysteine peptidase
CASP14	caspase 14, apoptosis-related cysteine peptidase
CASP5	caspase 5, apoptosis-related cysteine peptidase
CASP9	caspase 9, apoptosis-related cysteine peptidase
CASQ1	calsequestrin 1 (fast-twitch, skeletal muscle)
CASR	calcium-sensing receptor
CATSPER3	cation channel, sperm associated 3
CAV3	caveolin 3
CBLN1	cerebellin 1 precursor
CBX6	chromobox homolog 6
CC2D2A	coiled-coil and C2 domain containing 2A
CCDC102B	coiled-coil domain containing 102B
CCDC122	coiled-coil domain containing 122
CCDC124	coiled-coil domain containing 124
CCDC135	coiled-coil domain containing 135
CCDC144C	coiled-coil domain containing 144C
CCDC151	coiled-coil domain containing 151
CCDC163P	coiled-coil domain containing 163, pseudogene
CCDC164	coiled-coil domain containing 164
CCDC172	coiled-coil domain containing 172
CCDC30	coiled-coil domain containing 30
CCDC33	coiled-coil domain containing 33
CCDC42B	coiled-coil domain containing 42B
CCDC53	coiled-coil domain containing 53
CCDC60	coiled-coil domain containing 60
CCDC70	coiled-coil domain containing 70
CCDC73	coiled-coil domain containing 73
CCDC78	coiled-coil domain containing 78
CCDC87	coiled-coil domain containing 87
CCL1	chemokine (C-C motif) ligand 1
CCL11	chemokine (C-C motif) ligand 11
CCL13	chemokine (C-C motif) ligand 13
CCL14	chemokine (C-C motif) ligand 14
CCL15	chemokine (C-C motif) ligand 15
CCL16	chemokine (C-C motif) ligand 16
CCL18	chemokine (C-C motif) ligand 18 (pulmonary and activation-regulated)
CCL19	chemokine (C-C motif) ligand 19
CCL20	chemokine (C-C motif) ligand 20
CCL21	chemokine (C-C motif) ligand 21
CCL23	chemokine (C-C motif) ligand 23
CCL24	chemokine (C-C motif) ligand 24
CCL28	chemokine (C-C motif) ligand 28
CCL3	chemokine (C-C motif) ligand 3
CCL3L1	chemokine (C-C motif) ligand 3-like 1
CCL3L3	chemokine (C-C motif) ligand 3-like 3
CCL4	chemokine (C-C motif) ligand 4
CCL4L1	chemokine (C-C motif) ligand 4-like 1
CCL4L2	chemokine (C-C motif) ligand 4-like 2
CCL5	chemokine (C-C motif) ligand 5
CCL7	chemokine (C-C motif) ligand 7
CCL8	chemokine (C-C motif) ligand 8
CCNB3	cyclin B3
CCNL1	cyclin L1
CCR1	chemokine (C-C motif) receptor 1
CCR2	chemokine (C-C motif) receptor 2
CCR3	chemokine (C-C motif) receptor 3
CCR4	chemokine (C-C motif) receptor 4
CCR5	chemokine (C-C motif) receptor 5 (gene/pseudogene)
CCR6	chemokine (C-C motif) receptor 6
CCR8	chemokine (C-C motif) receptor 8
CCR9	chemokine (C-C motif) receptor 9
CCRL2	chemokine (C-C motif) receptor-like 2
CCSAP	centriole, cilia and spindle-associated protein
CCT8L1P	chaperonin containing TCP1, subunit 8 (theta)-like 1, pseudogene
CCT8L2	chaperonin containing TCP1, subunit 8 (theta)-like 2
CD109	CD109 molecule
CD177	CD177 molecule
CD180	CD180 molecule
CD1A	CD1a molecule
CD1B	CD1b molecule
CD1C	CD1c molecule
CD1D	CD1d molecule
CD1E	CD1e molecule
CD200R1	CD200 receptor 1
CD200R1L	CD200 receptor 1-like
CD207	CD207 molecule, langerin
CD22	CD22 molecule
CD226	CD226 molecule
CD244	CD244 molecule, natural killer cell receptor 2B4
CD247	CD247 molecule
CD2AP	CD2-associated protein
CD300C	CD300c molecule
CD300E	CD300e molecule
CD300LB	CD300 molecule-like family member b
CD300LD	CD300 molecule-like family member d
CD300LF	CD300 molecule-like family member f
CD33	CD33 molecule
CD3D	CD3d molecule, delta (CD3-TCR complex)
CD3E	CD3e molecule, epsilon (CD3-TCR complex)
CD3G	CD3g molecule, gamma (CD3-TCR complex)
CD4	CD4 molecule
CD40	CD40 molecule, TNF receptor superfamily member 5
CD40LG	CD40 ligand
CD48	CD48 molecule
CD52	CD52 molecule
CD53	CD53 molecule
CD5L	CD5 molecule-like
CD68	CD68 molecule
CD69	CD69 molecule
CD7	CD7 molecule
CD84	CD84 molecule
CD86	CD86 molecule
CD8B	CD8b molecule
CDC14C	CDC14 cell division cycle 14 homolog C (S. cerevisiae)
CDC42BPA	CDC42 binding protein kinase alpha (DMPK-like)
CDC7	cell division cycle 7 homolog (S. cerevisiae)
CDH12	cadherin 12, type 2 (N-cadherin 2)
CDH15	cadherin 15, type 1, M-cadherin (myotubule)
CDH18	cadherin 18, type 2
CDH19	cadherin 19, type 2
CDH20	cadherin 20, type 2
CDH24	cadherin 24, type 2
CDH26	cadherin 26
CDH8	cadherin 8, type 2
CDK1	cyclin-dependent kinase 1
CDK14	cyclin-dependent kinase 14
CDK18	cyclin-dependent kinase 18
CDKL5	cyclin-dependent kinase-like 5
CDKN2AIPNL	CDKN2A interacting protein N-terminal like
CDO1	cysteine dioxygenase, type I
CDON	Cdon homolog (mouse)
CDRT1	CMT1A duplicated region transcript 1
CDRT15P1	CMT1A duplicated region transcript 15 pseudogene 1
CDRT4	CMT1A duplicated region transcript 4
CDX4	caudal type homeobox 4
CDYL	chromodomain protein, Y-like
CEACAM18	carcinoembryonic antigen-related cell adhesion molecule 18
CEACAM20	carcinoembryonic antigen-related cell adhesion molecule 20
CEACAM21	carcinoembryonic antigen-related cell adhesion molecule 21
CEACAM3	carcinoembryonic antigen-related cell adhesion molecule 3
CEACAM4	carcinoembryonic antigen-related cell adhesion molecule 4
CEACAM5	carcinoembryonic antigen-related cell adhesion molecule 5
CEACAM6	carcinoembryonic antigen-related cell adhesion molecule 6 (non-specific cross reacting antigen)
CEACAM7	carcinoembryonic antigen-related cell adhesion molecule 7
CEACAM8	carcinoembryonic antigen-related cell adhesion molecule 8
CEBPB	CCAAT/enhancer binding protein (C/EBP), beta
CECR1	cat eye syndrome chromosome region, candidate 1
CECR2	cat eye syndrome chromosome region, candidate 2
CECR7	cat eye syndrome chromosome region, candidate 7 (non-protein coding)
CELA2A	chymotrypsin-like elastase family, member 2A
CELA2B	chymotrypsin-like elastase family, member 2B
CELA3A	chymotrypsin-like elastase family, member 3A
CELA3B	chymotrypsin-like elastase family, member 3B
CELF2	CUGBP, Elav-like family member 2
CELSR1	cadherin, EGF LAG seven-pass G-type receptor 1 (flamingo homolog, Drosophila)
CENPBD1	CENPB DNA-binding domains containing 1
CENPE	centromere protein E, 312kDa
CENPI	centromere protein I
CEP72	centrosomal protein 72kDa
CEP78	centrosomal protein 78kDa
CER1	cerberus 1, cysteine knot superfamily, homolog (Xenopus laevis)
CERS4	ceramide synthase 4
CES1P1	carboxylesterase 1 pseudogene 1
CES2	carboxylesterase 2
CES3	carboxylesterase 3
CES5A	carboxylesterase 5A
CETN2	centrin, EF-hand protein, 2
CFC1	cripto, FRL-1, cryptic family 1
CFC1B	cripto, FRL-1, cryptic family 1B
CFDP1	craniofacial development protein 1
CFH	complement factor H
CFHR1	complement factor H-related 1
CFHR2	complement factor H-related 2
CFHR5	complement factor H-related 5
CFI	complement factor I
CFTR	cystic fibrosis transmembrane conductance regulator (ATP-binding cassette sub-family C, member 7)
CHADL	chondroadherin-like
CHD3	chromodomain helicase DNA binding protein 3
CHFR	checkpoint with forkhead and ring finger domains, E3 ubiquitin protein ligase
CHGA	chromogranin A (parathyroid secretory protein 1)
CHIA	chitinase, acidic
CHIC2	cysteine-rich hydrophobic domain 2
CHID1	chitinase domain containing 1
CHODL	chondrolectin
CHORDC1	cysteine and histidine-rich domain (CHORD) containing 1
CHP2	calcineurin-like EF hand protein 2
CHRFAM7A	CHRNA7 (cholinergic receptor, nicotinic, alpha 7, exons 5-10) and FAM7A (family with sequence similarity 7A, exons A-E) fusion
CHRNA1	cholinergic receptor, nicotinic, alpha 1 (muscle)
CHRNA10	cholinergic receptor, nicotinic, alpha 10 (neuronal)
CHRNA2	cholinergic receptor, nicotinic, alpha 2 (neuronal)
CHRNB1	cholinergic receptor, nicotinic, beta 1 (muscle)
CHRNB2	cholinergic receptor, nicotinic, beta 2 (neuronal)
CHRNE	cholinergic receptor, nicotinic, epsilon (muscle)
CHST15	carbohydrate (N-acetylgalactosamine 4-sulfate 6-O) sulfotransferase 15
CHST4	carbohydrate (N-acetylglucosamine 6-O) sulfotransferase 4
CHST8	carbohydrate (N-acetylgalactosamine 4-0) sulfotransferase 8
CIB1	calcium and integrin binding 1 (calmyrin)
CIB3	calcium and integrin binding family member 3
CIB4	calcium and integrin binding family member 4
CIDEA	cell death-inducing DFFA-like effector a
CIDEC	cell death-inducing DFFA-like effector c
CIITA	class II, major histocompatibility complex, transactivator
CIZ1	CDKN1A interacting zinc finger protein 1
CKB	creatine kinase, brain
CKMT2	creatine kinase, mitochondrial 2 (sarcomeric)
CLC	Charcot-Leyden crystal protein
CLCA1	chloride channel accessory 1
CLCN1	chloride channel, voltage-sensitive 1
CLCN4	chloride channel, voltage-sensitive 4
CLCN5	chloride channel, voltage-sensitive 5
CLCNKB	chloride channel, voltage-sensitive Kb
CLDN10	claudin 10
CLDN14	claudin 14
CLDN17	claudin 17
CLDN18	claudin 18
CLDN2	claudin 2
CLDN20	claudin 20
CLDN22	claudin 22
CLDN25	claudin 25
CLDN8	claudin 8
CLDND2	claudin domain containing 2
CLEC10A	C-type lectin domain family 10, member A
CLEC17A	C-type lectin domain family 17, member A
CLEC18A	C-type lectin domain family 18, member A
CLEC18B	C-type lectin domain family 18, member B
CLEC18C	C-type lectin domain family 18, member C
CLEC19A	C-type lectin domain family 19, member A
CLEC1A	C-type lectin domain family 1, member A
CLEC1B	C-type lectin domain family 1, member B
CLEC2A	C-type lectin domain family 2, member A
CLEC3A	C-type lectin domain family 3, member A
CLEC3B	C-type lectin domain family 3, member B
CLEC4D	C-type lectin domain family 4, member D
CLEC4F	C-type lectin domain family 4, member F
CLEC4M	C-type lectin domain family 4, member M
CLEC5A	C-type lectin domain family 5, member A
CLIC2	chloride intracellular channel 2
CLIC5	chloride intracellular channel 5
CLK2P	CDC-like kinase 2, pseudogene
CLK3	CDC-like kinase 3
CLLU1OS	chronic lymphocytic leukemia up-regulated 1 opposite strand
CLNS1A	chloride channel, nucleotide-sensitive, 1A
CLPP	ClpP caseinolytic peptidase, ATP-dependent, proteolytic subunit homolog (E. coli)
CLPS	colipase, pancreatic
CLPSL1	colipase-like 1
CLRN1	clarin 1
CLRN2	clarin 2
CLRN3	clarin 3
CLSTN3	calsyntenin 3
CLTCL1	clathrin, heavy chain-like 1
CLVS1	clavesin 1
CLYBL	citrate lyase beta like
CMA1	chymase 1, mast cell
CMAS	cytidine monophosphate N-acetylneuraminic acid synthetase
CMKLR1	chemokine-like receptor 1
CMTM5	CKLF-like MARVEL transmembrane domain containing 5
CMTM8	CKLF-like MARVEL transmembrane domain containing 8
CN5H6.4	uncharacterized LOC150384
CNBD1	cyclic nucleotide binding domain containing 1
CNDP1	carnosine dipeptidase 1 (metallopeptidase M20 family)
CNGA1	cyclic nucleotide gated channel alpha 1
CNGA2	cyclic nucleotide gated channel alpha 2
CNGA4	cyclic nucleotide gated channel alpha 4
CNGB1	cyclic nucleotide gated channel beta 1
CNIH	cornichon homolog (Drosophila)
CNPY1	canopy 1 homolog (zebrafish)
CNPY2	canopy 2 homolog (zebrafish)
CNR1	cannabinoid receptor 1 (brain)
CNTN1	contactin 1
CNTN2	contactin 2 (axonal)
CNTN4	contactin 4
CNTNAP5	contactin associated protein-like 5
COA3	cytochrome C oxidase assembly factor 3
COCH	coagulation factor C homolog, cochlin (Limulus polyphemus)
COG2	component of oligomeric golgi complex 2
COL20A1	collagen, type XX, alpha 1
COL21A1	collagen, type XXI, alpha 1
COL22A1	collagen, type XXII, alpha 1
COL4A5	collagen, type IV, alpha 5
COL4A6	collagen, type IV, alpha 6
COL6A6	collagen, type VI, alpha 6
COL7A1	collagen, type VII, alpha 1
COL9A1	collagen, type IX, alpha 1
COL9A2	collagen, type IX, alpha 2
COMMD7	COMM domain containing 7
COMP	cartilage oligomeric matrix protein
COMT	catechol-O-methyltransferase
COPG2	coatomer protein complex, subunit gamma 2
COPS3	COP9 constitutive photomorphogenic homolog subunit 3 (Arabidopsis)
CORO1B	coronin, actin binding protein, 1B
CORO1C	coronin, actin binding protein, 1C
CORO2A	coronin, actin binding protein, 2A
CPA2	carboxypeptidase A2 (pancreatic)
CPA3	carboxypeptidase A3 (mast cell)
CPA6	carboxypeptidase A6
CPB2	carboxypeptidase B2 (plasma)
CPD	carboxypeptidase D
CPEB1	cytoplasmic polyadenylation element binding protein 1
CPLX2	complexin 2
CPLX4	complexin 4
CPN1	carboxypeptidase N, polypeptide 1
CPN2	carboxypeptidase N, polypeptide 2
CPNE1	copine I
CPNE4	copine IV
CPNE6	copine VI (neuronal)
CPO	carboxypeptidase O
CPSF1	cleavage and polyadenylation specific factor 1, 160kDa
CPXM1	carboxypeptidase X (M14 family), member 1
CPXM2	carboxypeptidase X (M14 family), member 2
CR1L	complement component (3b/4b) receptor 1-like
CRABP1	cellular retinoic acid binding protein 1
CRB1	crumbs homolog 1 (Drosophila)
CRBN	cereblon
CRCT1	cysteine-rich C-terminal 1
CREB3L3	cAMP responsive element binding protein 3-like 3
CREB5	cAMP responsive element binding protein 5
CRISP1	cysteine-rich secretory protein 1
CRISP2	cysteine-rich secretory protein 2
CRISP3	cysteine-rich secretory protein 3
CRISPLD1	cysteine-rich secretory protein LCCL domain containing 1
CRLF2	cytokine receptor-like factor 2
CRNN	cornulin
CROCC	ciliary rootlet coiled-coil, rootletin
CRP	C-reactive protein, pentraxin-related
CRSP8P	mediator complex subunit 27 pseudogene
CRTAM	cytotoxic and regulatory T cell molecule
CRX	cone-rod homeobox
CRYBB1	crystallin, beta B1
CRYBB3	crystallin, beta B3
CRYGA	crystallin, gamma A
CRYGB	crystallin, gamma B
CRYGC	crystallin, gamma C
CSAG1	chondrosarcoma associated gene 1
CSAG2	CSAG family, member 2
CSAG3	CSAG family, member 3
CSF2RA	colony stimulating factor 2 receptor, alpha, low-affinity (granulocyte-macrophage)
CSF2RB	colony stimulating factor 2 receptor, beta, low-affinity (granulocyte-macrophage)
CSF3R	colony stimulating factor 3 receptor (granulocyte)
CSHL1	chorionic somatomammotropin hormone-like 1
CSK	c-src tyrosine kinase
CSMD1	CUB and Sushi multiple domains 1
CSMD3	CUB and Sushi multiple domains 3
CSN1S2AP	casein alpha s2-like A, pseudogene
CSN3	casein kappa
CSNK2A1	casein kinase 2, alpha 1 polypeptide
CSNK2A1P	casein kinase 2, alpha 1 polypeptide pseudogene
CST1	cystatin SN
CST11	cystatin 11
CST13P	cystatin 13, pseudogene
CST2	cystatin SA
CST3	cystatin C
CST4	cystatin S
CST5	cystatin D
CST7	cystatin F (leukocystatin)
CST8	cystatin 8 (cystatin-related epididymal specific)
CST9L	cystatin 9-like
CSTL1	cystatin-like 1
CT45A1	cancer/testis antigen family 45, member A1
CT45A2	cancer/testis antigen family 45, member A2
CT45A3	cancer/testis antigen family 45, member A3
CT45A4	cancer/testis antigen family 45, member A4
CT45A5	cancer/testis antigen family 45, member A5
CT45A6	cancer/testis antigen family 45, member A6
CT62	cancer/testis antigen 62
CTAG1A	cancer/testis antigen 1A
CTAG1B	cancer/testis antigen 1B
CTAG2	cancer/testis antigen 2
CTAGE11P	CTAGE family, member 11, pseudogene
CTAGE15P	CTAGE family, member 15, pseudogene
CTAGE4	CTAGE family, member 4
CTAGE6P	CTAGE family, member 6, pseudogene
CTAGE9	CTAGE family, member 9
CTDSPL	CTD (carboxy-terminal domain, RNA polymerase II, polypeptide A) small phosphatase-like
CTLA4	cytotoxic T-lymphocyte-associated protein 4
CTPS2	CTP synthase 2
CTRB1	chymotrypsinogen B1
CTRC	chymotrypsin C (caldecrin)
CTSE	cathepsin E
CTSG	cathepsin G
CTSH	cathepsin H
CTSL2	cathepsin L2
CTSL3	cathepsin L family member 3
CTU1	cytosolic thiouridylase subunit 1 homolog (S. pombe)
CTU2	cytosolic thiouridylase subunit 2 homolog (S. pombe)
CTXN3	cortexin 3
CWC22	CWC22 spliceosome-associated protein homolog (S. cerevisiae)
CX3CL1	chemokine (C-X3-C motif) ligand 1
CX3CR1	chemokine (C-X3-C motif) receptor 1
CXADRP3	coxsackie virus and adenovirus receptor pseudogene 3
CXCL13	chemokine (C-X-C motif) ligand 13
CXCL17	chemokine (C-X-C motif) ligand 17
CXCR1	chemokine (C-X-C motif) receptor 1
CXCR2	chemokine (C-X-C motif) receptor 2
CXCR5	chemokine (C-X-C motif) receptor 5
CXorf1	chromosome X open reading frame 1
CXorf22	chromosome X open reading frame 22
CXorf27	chromosome X open reading frame 27
CXorf48	chromosome X open reading frame 48
CXorf49	chromosome X open reading frame 49
CXorf49B	chromosome X open reading frame 49B
CXorf51A	chromosome X open reading frame 51A
CXorf57	chromosome X open reading frame 57
CXorf59	chromosome X open reading frame 59
CXorf61	chromosome X open reading frame 61
CXorf64	chromosome X open reading frame 64
CXorf65	chromosome X open reading frame 65
CYB5A	cytochrome b5 type A (microsomal)
CYBRD1	cytochrome b reductase 1
CYFIP1	cytoplasmic FMR1 interacting protein 1
CYLC1	cylicin, basic protein of sperm head cytoskeleton 1
CYLC2	cylicin, basic protein of sperm head cytoskeleton 2
CYLD	cylindromatosis (turban tumor syndrome)
CYMP	chymosin pseudogene
CYP11B2	cytochrome P450, family 11, subfamily B, polypeptide 2
CYP17A1	cytochrome P450, family 17, subfamily A, polypeptide 1
CYP19A1	cytochrome P450, family 19, subfamily A, polypeptide 1
CYP1A2	cytochrome P450, family 1, subfamily A, polypeptide 2
CYP1B1-AS1	CYP1B1 antisense RNA 1
CYP2A13	cytochrome P450, family 2, subfamily A, polypeptide 13
CYP2A6	cytochrome P450, family 2, subfamily A, polypeptide 6
CYP2A7	cytochrome P450, family 2, subfamily A, polypeptide 7
CYP2B6	cytochrome P450, family 2, subfamily B, polypeptide 6
CYP2B7P1	cytochrome P450, family 2, subfamily B, polypeptide 7 pseudogene 1
CYP2C18	cytochrome P450, family 2, subfamily C, polypeptide 18
CYP2C19	cytochrome P450, family 2, subfamily C, polypeptide 19
CYP2C8	cytochrome P450, family 2, subfamily C, polypeptide 8
CYP2C9	cytochrome P450, family 2, subfamily C, polypeptide 9
CYP2F1	cytochrome P450, family 2, subfamily F, polypeptide 1
CYP2J2	cytochrome P450, family 2, subfamily J, polypeptide 2
CYP3A4	cytochrome P450, family 3, subfamily A, polypeptide 4
CYP3A43	cytochrome P450, family 3, subfamily A, polypeptide 43
CYP3A5	cytochrome P450, family 3, subfamily A, polypeptide 5
CYP3A7	cytochrome P450, family 3, subfamily A, polypeptide 7
CYP4A11	cytochrome P450, family 4, subfamily A, polypeptide 11
CYP4A22	cytochrome P450, family 4, subfamily A, polypeptide 22
CYP4B1	cytochrome P450, family 4, subfamily B, polypeptide 1
CYP4F11	cytochrome P450, family 4, subfamily F, polypeptide 11
CYP4F12	cytochrome P450, family 4, subfamily F, polypeptide 12
CYP4F3	cytochrome P450, family 4, subfamily F, polypeptide 3
CYP4F30P	cytochrome P450, family 4, subfamily F, polypeptide 30, pseudogene
CYP4F35P	cytochrome P450, family 4, subfamily F, polypeptide 35, pseudogene
CYP4F8	cytochrome P450, family 4, subfamily F, polypeptide 8
CYP4X1	cytochrome P450, family 4, subfamily X, polypeptide 1
CYP4Z1	cytochrome P450, family 4, subfamily Z, polypeptide 1
CYP4Z2P	cytochrome P450, family 4, subfamily Z, polypeptide 2 pseudogene
CYP7B1	cytochrome P450, family 7, subfamily B, polypeptide 1
CYP8B1	cytochrome P450, family 8, subfamily B, polypeptide 1
CYSLTR1	cysteinyl leukotriene receptor 1
CYSLTR2	cysteinyl leukotriene receptor 2
CYSTM1	cysteine-rich transmembrane module containing 1
DAAM2	dishevelled associated activator of morphogenesis 2
DAB2IP	DAB2 interacting protein
DACH2	dachshund homolog 2 (Drosophila)
DAO	D-amino-acid oxidase
DAOA	D-amino acid oxidase activator
DAPP1	dual adaptor of phosphotyrosine and 3-phosphoinositides
DARC	Duffy blood group, chemokine receptor
DBC1	deleted in bladder cancer 1
DCAF4L1	DDB1 and CUL4 associated factor 4-like 1
DCAF4L2	DDB1 and CUL4 associated factor 4-like 2
DCAF8L1	DDB1 and CUL4 associated factor 8-like 1
DCAF8L2	DDB1 and CUL4 associated factor 8-like 2
DCC	deleted in colorectal carcinoma
DCD	dermcidin
DCHS2	dachsous 2 (Drosophila)
DCP2	DCP2 decapping enzyme homolog (S. cerevisiae)
DCST1	DC-STAMP domain containing 1
DCSTAMP	dendrocyte expressed seven transmembrane protein
DCTN1	dynactin 1
DCX	doublecortin
DCXR	dicarbonyl/L-xylulose reductase
DDC	dopa decarboxylase (aromatic L-amino acid decarboxylase)
DDO	D-aspartate oxidase
DDR1	discoidin domain receptor tyrosine kinase 1
DDX26B	DEAD/H (Asp-Glu-Ala-Asp/His) box polypeptide 26B
DDX4	DEAD (Asp-Glu-Ala-Asp) box polypeptide 4
DDX47	DEAD (Asp-Glu-Ala-Asp) box polypeptide 47
DDX49	DEAD (Asp-Glu-Ala-Asp) box polypeptide 49
DDX53	DEAD (Asp-Glu-Ala-Asp) box polypeptide 53
DEAF1	deformed epidermal autoregulatory factor 1 (Drosophila)
DEFA1	defensin, alpha 1
DEFA1B	defensin, alpha 1B
DEFA3	defensin, alpha 3, neutrophil-specific
DEFA4	defensin, alpha 4, corticostatin
DEFA5	defensin, alpha 5, Paneth cell-specific
DEFA6	defensin, alpha 6, Paneth cell-specific
DEFB1	defensin, beta 1
DEFB103A	defensin, beta 103A
DEFB103B	defensin, beta 103B
DEFB104A	defensin, beta 104A
DEFB104B	defensin, beta 104B
DEFB105A	defensin, beta 105A
DEFB105B	defensin, beta 105B
DEFB106A	defensin, beta 106A
DEFB106B	defensin, beta 106B
DEFB107A	defensin, beta 107A
DEFB107B	defensin, beta 107B
DEFB108B	defensin, beta 108B
DEFB109P1	defensin, beta 109, pseudogene 1
DEFB109P1B	defensin, beta 109, pseudogene 1B
DEFB113	defensin, beta 113
DEFB115	defensin, beta 115
DEFB116	defensin, beta 116
DEFB118	defensin, beta 118
DEFB119	defensin, beta 119
DEFB121	defensin, beta 121
DEFB122	defensin, beta 122 (pseudogene)
DEFB123	defensin, beta 123
DEFB125	defensin, beta 125
DEFB126	defensin, beta 126
DEFB127	defensin, beta 127
DEFB128	defensin, beta 128
DEFB129	defensin, beta 129
DEFB130	defensin, beta 130
DEFB131	defensin, beta 131
DEFB135	defensin, beta 135
DEFB136	defensin, beta 136
DENND1A	DENN/MADD domain containing 1A
DENND1C	DENN/MADD domain containing 1C
DEPDC1	DEP domain containing 1
DEPDC1B	DEP domain containing 1B
DESI2	desumoylating isopeptidase 2
DGAT2L6	diacylglycerol O-acyltransferase 2-like 6
DGCR6	DiGeorge syndrome critical region gene 6
DGKE	diacylglycerol kinase, epsilon 64kDa
DGKK	diacylglycerol kinase, kappa
DHDH	dihydrodiol dehydrogenase (dimeric)
DHRS13	dehydrogenase/reductase (SDR family) member 13
DHRS2	dehydrogenase/reductase (SDR family) member 2
DHRS4	dehydrogenase/reductase (SDR family) member 4
DHRS4-AS1	DHRS4 antisense RNA 1
DHRS7C	dehydrogenase/reductase (SDR family) member 7C
DHRS9	dehydrogenase/reductase (SDR family) member 9
DHRSX	dehydrogenase/reductase (SDR family) X-linked
DHX38	DEAH (Asp-Glu-Ala-His) box polypeptide 38
DIAPH2	diaphanous homolog 2 (Drosophila)
DIO1	deiodinase, iodothyronine, type I
DIO3OS	DIO3 opposite strand/antisense RNA
DIRAS2	DIRAS family, GTP-binding RAS-like 2
DIRAS3	DIRAS family, GTP-binding RAS-like 3
DIRC2	disrupted in renal carcinoma 2
DISC1	disrupted in schizophrenia 1
DKFZp434J0226	uncharacterized LOC93429
DKFZP434L187	uncharacterized LOC26082
DKFZp434L192	uncharacterized protein DKFZp434L192
DKKL1	dickkopf-like 1
DLEC1	deleted in lung and esophageal cancer 1
DLG2	discs, large homolog 2 (Drosophila)
DLG3	discs, large homolog 3 (Drosophila)
DLGAP1	discs, large (Drosophila) homolog-associated protein 1
DLGAP2	discs, large (Drosophila) homolog-associated protein 2
DLGAP3	discs, large (Drosophila) homolog-associated protein 3
DLX5	distal-less homeobox 5
DLX6	distal-less homeobox 6
DLX6-AS1	DLX6 antisense RNA 1
DMBT1	deleted in malignant brain tumors 1
DMBX1	diencephalon/mesencephalon homeobox 1
DMD	dystrophin
DMKN	dermokine
DMRT2	doublesex and mab-3 related transcription factor 2
DMRTC1	DMRT-like family C1
DMRTC1B	DMRT-like family C1B
DMRTC2	DMRT-like family C2
DNAH12	dynein, axonemal, heavy chain 12
DNAH5	dynein, axonemal, heavy chain 5
DNAH8	dynein, axonemal, heavy chain 8
DNAH9	dynein, axonemal, heavy chain 9
DNAI1	dynein, axonemal, intermediate chain 1
DNAI2	dynein, axonemal, intermediate chain 2
DNAJB13	DnaJ (Hsp40) homolog, subfamily B, member 13
DNAJB3	DnaJ (Hsp40) homolog, subfamily B, member 3
DNAJB8	DnaJ (Hsp40) homolog, subfamily B, member 8
DNAJC16	DnaJ (Hsp40) homolog, subfamily C, member 16
DNAJC5B	DnaJ (Hsp40) homolog, subfamily C, member 5 beta
DNAJC5G	DnaJ (Hsp40) homolog, subfamily C, member 5 gamma
DNAJC6	DnaJ (Hsp40) homolog, subfamily C, member 6
DNAL4	dynein, axonemal, light chain 4
DNALI1	dynein, axonemal, light intermediate chain 1
DNASE1L1	deoxyribonuclease I-like 1
DNASE1L3	deoxyribonuclease I-like 3
DNASE2B	deoxyribonuclease II beta
DND1	dead end homolog 1 (zebrafish)
DNLZ	DNL-type zinc finger
DNPEP	aspartyl aminopeptidase
DNTT	deoxynucleotidyltransferase, terminal
DOCK8	dedicator of cytokinesis 8
DOK5	docking protein 5
DOPEY2	dopey family member 2
DPEP1	dipeptidase 1 (renal)
DPEP2	dipeptidase 2
DPH2	DPH2 homolog (S. cerevisiae)
DPP10	dipeptidyl-peptidase 10 (non-functional)
DPP6	dipeptidyl-peptidase 6
DPPA3	developmental pluripotency associated 3
DPPA4	developmental pluripotency associated 4
DPRX	divergent-paired related homeobox
DPY19L2P1	dpy-19-like 2 pseudogene 1 (C. elegans)
DPYS	dihydropyrimidinase
DRD3	dopamine receptor D3
DRD5	dopamine receptor D5
DRGX	dorsal root ganglia homeobox
DRP2	dystrophin related protein 2
DSC1	desmocollin 1
DSG1	desmoglein 1
DSG2	desmoglein 2
DSG3	desmoglein 3
DSG4	desmoglein 4
DTHD1	death domain containing 1
DTNA	dystrobrevin, alpha
DTNB	dystrobrevin, beta
DTWD2	DTW domain containing 2
DTX2	deltex homolog 2 (Drosophila)
DTX2P1-UPK3BP1-PMS2P11	DTX2P1-UPK3BP1-PMS2P11 readthrough (non-protein coding)
DUSP10	dual specificity phosphatase 10
DUSP13	dual specificity phosphatase 13
DUSP21	dual specificity phosphatase 21
DUSP27	dual specificity phosphatase 27 (putative)
DYDC1	DPY30 domain containing 1
DYDC2	DPY30 domain containing 2
DYNC1I2	dynein, cytoplasmic 1, intermediate chain 2
DYNLRB2	dynein, light chain, roadblock-type 2
DYRK4	dual-specificity tyrosine-(Y)-phosphorylation regulated kinase 4
DYX1C1	dyslexia susceptibility 1 candidate 1
DZANK1	double zinc ribbon and ankyrin repeat domains 1
EBI3	Epstein-Barr virus induced 3
ECHDC3	enoyl CoA hydratase domain containing 3
ECT2L	epithelial cell transforming sequence 2 oncogene-like
EDAR	ectodysplasin A receptor
EDARADD	EDAR-associated death domain
EDDM3A	epididymal protein 3A
EDDM3B	epididymal protein 3B
EDF1	endothelial differentiation-related factor 1
EDN3	endothelin 3
EDNRB	endothelin receptor type B
EEA1	early endosome antigen 1
EEF1A1P9	eukaryotic translation elongation factor 1 alpha 1 pseudogene 9
EFCAB10	EF-hand calcium binding domain 10
EFCAB3	EF-hand calcium binding domain 3
EFCAB8	EF-hand calcium binding domain 8
EFHB	EF-hand domain family, member B
EFS	embryonal Fyn-associated substrate
EFTUD1	elongation factor Tu GTP binding domain containing 1
EGF	epidermal growth factor
EGFLAM	EGF-like, fibronectin type III and laminin G domains
EGOT	eosinophil granule ontogeny transcript (non-protein coding)
EHBP1	EH domain binding protein 1
EHD3	EH-domain containing 3
EHF	ets homologous factor
EID2B	EP300 interacting inhibitor of differentiation 2B
EIF2B3	eukaryotic translation initiation factor 2B, subunit 3 gamma, 58kDa
EIF3F	eukaryotic translation initiation factor 3, subunit F
EIF3IP1	eukaryotic translation initiation factor 3, subunit I pseudogene 1
EIF4E3	eukaryotic translation initiation factor 4E family member 3
EIF4EBP3	eukaryotic translation initiation factor 4E binding protein 3
ELAVL2	ELAV (embryonic lethal, abnormal vision, Drosophila)-like 2 (Hu antigen B)
ELAVL4	ELAV (embryonic lethal, abnormal vision, Drosophila)-like 4
ELK1	ELK1, member of ETS oncogene family
ELMO1	engulfment and cell motility 1
ELMO2	engulfment and cell motility 2
EMP2	epithelial membrane protein 2
EMR1	egf-like module containing, mucin-like, hormone receptor-like 1
EMR3	egf-like module containing, mucin-like, hormone receptor-like 3
EMR4P	egf-like module containing, mucin-like, hormone receptor-like 4 pseudogene
ENDOV	endonuclease V
ENHO	energy homeostasis associated
ENPP3	ectonucleotide pyrophosphatase/phosphodiesterase 3
ENPP5	ectonucleotide pyrophosphatase/phosphodiesterase 5 (putative)
ENPP6	ectonucleotide pyrophosphatase/phosphodiesterase 6
ENPP7	ectonucleotide pyrophosphatase/phosphodiesterase 7
ENTHD1	ENTH domain containing 1
ENTPD1	ectonucleoside triphosphate diphosphohydrolase 1
ENTPD8	ectonucleoside triphosphate diphosphohydrolase 8
EPHA10	EPH receptor A10
EPN2	epsin 2
EPO	erythropoietin
EPPIN	epididymal peptidase inhibitor
EPS8L3	EPS8-like 3
ERC2-IT1	ERC2 intronic transcript 1 (non-protein coding)
EREG	epiregulin
ERICH1	glutamate-rich 1
ERN2	endoplasmic reticulum to nucleus signaling 2
ERP27	endoplasmic reticulum protein 27
ERVFRD-1	endogenous retrovirus group FRD, member 1
ESPNP	espin pseudogene
ESR1	estrogen receptor 1
ESRG	embryonic stem cell related (non-protein coding)
ESRRB	estrogen-related receptor beta
ESRRG	estrogen-related receptor gamma
ESX1	ESX homeobox 1
ETFB	electron-transfer-flavoprotein, beta polypeptide
ETV2	ets variant 2
ETV3L	ets variant 3-like
ETV4	ets variant 4
EXOC6	exocyst complex component 6
EXOSC10	exosome component 10
EXPH5	exophilin 5
EYS	eyes shut homolog (Drosophila)
F11	coagulation factor XI
F12	coagulation factor XII (Hageman factor)
F13A1	coagulation factor XIII, A1 polypeptide
F13B	coagulation factor XIII, B polypeptide
FAAH	fatty acid amide hydrolase
FAAH2	fatty acid amide hydrolase 2
FABP1	fatty acid binding protein 1, liver
FABP12	fatty acid binding protein 12
FABP6	fatty acid binding protein 6, ileal
FABP7	fatty acid binding protein 7, brain
FAIM3	Fas apoptotic inhibitory molecule 3
FAM101A	family with sequence similarity 101, member A
FAM104B	family with sequence similarity 104, member B
FAM106A	family with sequence similarity 106, member A
FAM107A	family with sequence similarity 107, member A
FAM107B	family with sequence similarity 107, member B
FAM109A	family with sequence similarity 109, member A
FAM110A	family with sequence similarity 110, member A
FAM111B	family with sequence similarity 111, member B
FAM115C	family with sequence similarity 115, member C
FAM118A	family with sequence similarity 118, member A
FAM127A	family with sequence similarity 127, member A
FAM129B	family with sequence similarity 129, member B
FAM132A	family with sequence similarity 132, member A
FAM134B	family with sequence similarity 134, member B
FAM135B	family with sequence similarity 135, member B
FAM138A	family with sequence similarity 138, member A
FAM138B	family with sequence similarity 138, member B
FAM138C	family with sequence similarity 138, member C
FAM138D	family with sequence similarity 138, member D
FAM138E	family with sequence similarity 138, member E
FAM138F	family with sequence similarity 138, member F
FAM151A	family with sequence similarity 151, member A
FAM153B	family with sequence similarity 153, member B
FAM154B	family with sequence similarity 154, member B
FAM157A	family with sequence similarity 157, member A
FAM157B	family with sequence similarity 157, member B
FAM159A	family with sequence similarity 159, member A
FAM160B2	family with sequence similarity 160, member B2
FAM165B	family with sequence similarity 165, member B
FAM169B	family with sequence similarity 169, member B
FAM170A	family with sequence similarity 170, member A
FAM171A2	family with sequence similarity 171, member A2
FAM176A	family with sequence similarity 176, member A
FAM176C	family with sequence similarity 176, member C
FAM177B	family with sequence similarity 177, member B
FAM178A	family with sequence similarity 178, member A
FAM181A	family with sequence similarity 181, member A
FAM182A	family with sequence similarity 182, member A
FAM182B	family with sequence similarity 182, member B
FAM183B	acyloxyacyl hydrolase (neutrophil)
FAM188B	family with sequence similarity 188, member B
FAM190A	family with sequence similarity 190, member A
FAM193A	family with sequence similarity 193, member A
FAM195A	family with sequence similarity 195, member A
FAM198A	family with sequence similarity 198, member A
FAM200A	family with sequence similarity 200, member A
FAM205A	family with sequence similarity 205, member A
FAM205B	transmembrane protein C9orf144B pseudogene
FAM209A	family with sequence similarity 209, member A
FAM209B	family with sequence similarity 209, member B
FAM213B	family with sequence similarity 213, member B
FAM219A	family with sequence similarity 219, member A
FAM222A	family with sequence similarity 222, member A
FAM222A-AS1	FAM222A antisense RNA 1
FAM223A	family with sequence similarity 223, member A (non-protein coding)
FAM223B	family with sequence similarity 223, member B (non-protein coding)
FAM226A	family with sequence similarity 226, member A (non-protein coding)
FAM226B	family with sequence similarity 226, member B (non-protein coding)
FAM22A	family with sequence similarity 22, member A
FAM24A	family with sequence similarity 24, member A
FAM25B	family with sequence similarity 25, member B
FAM25C	family with sequence similarity 25, member C
FAM25G	family with sequence similarity 25, member G
FAM27A	family with sequence similarity 27, member A
FAM27B	family with sequence similarity 27, member B
FAM27C	family with sequence similarity 27, member C
FAM27L	family with sequence similarity 27-like
FAM3D	family with sequence similarity 3, member D
FAM41C	family with sequence similarity 41, member C
FAM47A	family with sequence similarity 47, member A
FAM47C	family with sequence similarity 47, member C
FAM48B1	family with sequence similarity 48, member B1
FAM49A	family with sequence similarity 49, member A
FAM5B	family with sequence similarity 5, member B
FAM5C	family with sequence similarity 5, member C
FAM63B	family with sequence similarity 63, member B
FAM64A	family with sequence similarity 64, member A
FAM65B	family with sequence similarity 65, member B
FAM65C	family with sequence similarity 65, member C
FAM70A	family with sequence similarity 70, member A
FAM71A	family with sequence similarity 71, member A
FAM71B	family with sequence similarity 71, member B
FAM71C	family with sequence similarity 71, member C
FAM75B	family with sequence similarity 75, member B
FAM75C1	family with sequence similarity 75, member C1
FAM75D1	family with sequence similarity 75, member D1
FAM75D3	family with sequence similarity 75, member D3
FAM75D4	family with sequence similarity 75, member D4
FAM75D5	FAM75-like protein FLJ46321 pseudogene
FAM89A	family with sequence similarity 89, member A
FAM95B1	family with sequence similarity 95, member B1
FAM99A	family with sequence similarity 99, member A (non-protein coding)
FAM99B	family with sequence similarity 99, member B (non-protein coding)
FANCA	Fanconi anemia, complementation group A
FAR2	fatty acyl CoA reductase 2
FARSA	phenylalanyl-tRNA synthetase, alpha subunit
FASTKD2	FAST kinase domains 2
FAT2	FAT tumor suppressor homolog 2 (Drosophila)
FATE1	fetal and adult testis expressed 1
FBL	fibrillarin
FBLN7	fibulin 7
FBRS	fibrosin
FBXL12	F-box and leucine-rich repeat protein 12
FBXL2	F-box and leucine-rich repeat protein 2
FBXO16	F-box protein 16
FBXO21	F-box protein 21
FBXO25	F-box protein 25
FBXO32	F-box protein 32
FBXO40	F-box protein 40
FBXO41	F-box protein 41
FBXO7	F-box protein 7
FBXW12	F-box and WD repeat domain containing 12
FBXW4	F-box and WD repeat domain containing 4
FCAMR	Fc receptor, IgA, IgM, high affinity
FCER1A	Fc fragment of IgE, high affinity I, receptor for; alpha polypeptide
FCER1G	Fc fragment of IgE, high affinity I, receptor for; gamma polypeptide
FCER2	Fc fragment of IgE, low affinity II, receptor for (CD23)
FCGBP	Fc fragment of IgG binding protein
FCGR1A	Fc fragment of IgG, high affinity Ia, receptor (CD64)
FCGR1B	Fc fragment of IgG, high affinity Ib, receptor (CD64)
FCGR1C	Fc fragment of IgG, high affinity Ic, receptor (CD64), pseudogene
FCGR2A	Fc fragment of IgG, low affinity IIa, receptor (CD32)
FCGR2B	Fc fragment of IgG, low affinity IIb, receptor (CD32)
FCGR2C	Fc fragment of IgG, low affinity IIc, receptor for (CD32) (gene/pseudogene)
FCGR3B	Fc fragment of IgG, low affinity IIIb, receptor (CD16b)
FCN1	ficolin (collagen/fibrinogen domain containing) 1
FCN2	ficolin (collagen/fibrinogen domain containing lectin) 2 (hucolin)
FCRL1	Fc receptor-like 1
FCRL2	Fc receptor-like 2
FCRL3	Fc receptor-like 3
FCRL4	Fc receptor-like 4
FCRL5	Fc receptor-like 5
FCRL6	Fc receptor-like 6
FDCSP	follicular dendritic cell secreted protein
FDPS	farnesyl diphosphate synthase
FDPSL2A	MGC44478
FDXR	ferredoxin reductase
FER1L4	fer-1-like 4 (C. elegans) pseudogene
FER1L5	fer-1-like 5 (C. elegans)
FERD3L	Fer3-like (Drosophila)
FETUB	fetuin B
FFAR2	free fatty acid receptor 2
FFAR3	free fatty acid receptor 3
FGA	fibrinogen alpha chain
FGD3	FYVE, RhoGEF and PH domain containing 3
FGD5	FYVE, RhoGEF and PH domain containing 5
FGF1	fibroblast growth factor 1 (acidic)
FGF12	fibroblast growth factor 12
FGF13	fibroblast growth factor 13
FGF14	fibroblast growth factor 14
FGF21	fibroblast growth factor 21
FGF22	fibroblast growth factor 22
FGF23	fibroblast growth factor 23
FGF6	fibroblast growth factor 6
FGFBP1	fibroblast growth factor binding protein 1
FGFBP2	fibroblast growth factor binding protein 2
FGFR2	fibroblast growth factor receptor 2
FGFRL1	fibroblast growth factor receptor-like 1
FGG	fibrinogen gamma chain
FGGY	FGGY carbohydrate kinase domain containing
FHAD1	forkhead-associated (FHA) phosphopeptide binding domain 1
FHIT	fragile histidine triad
FHL1	four and a half LIM domains 1
FIG4	FIG4 homolog, SAC1 lipid phosphatase domain containing (S. cerevisiae)
FIGF	c-fos induced growth factor (vascular endothelial growth factor D)
FILIP1L	filamin A interacting protein 1-like
FKBP1A	FK506 binding protein 1A, 12kDa
FKBP1AP1	FK506 binding protein 1A, 12kDa pseudogene 1
FKBP1B	FK506 binding protein 1B, 12.6 kDa
FKBP4	FK506 binding protein 4, 59kDa
FKBP8	FK506 binding protein 8, 38kDa
FKBP9L	FK506 binding protein 9-like
FKSG2	tumor protein, translationally-controlled 1 pseudogene
FKSG29	FKSG29
FLG	filaggrin
FLG2	filaggrin family member 2
FLJ25328	uncharacterized LOC148231
FLJ25758	MAP/microtubule affinity-regulating kinase 1 pseudogene
FLJ30679	uncharacterized protein FLJ30679
FLJ33360	FLJ33360 protein
FLJ36000	uncharacterized FLJ36000
FLJ42627	uncharacterized LOC645644
FLJ44635	TPT1-like protein
FLJ45340	uncharacterized LOC402483
FLJ46361	deleted in malignant brain tumors 1 pseudogene
FLRT1	fibronectin leucine rich transmembrane protein 1
FMO2	flavin containing monooxygenase 2 (non-functional)
FMO3	flavin containing monooxygenase 3
FMO4	flavin containing monooxygenase 4
FMO6P	flavin containing monooxygenase 6 pseudogene
FMO9P	flavin containing monooxygenase 9 pseudogene
FMR1NB	fragile X mental retardation 1 neighbor
FNDC4	fibronectin type III domain containing 4
FNDC5	fibronectin type III domain containing 5
FOLH1	folate hydrolase (prostate-specific membrane antigen) 1
FOLH1B	folate hydrolase 1B
FOXA1	forkhead box A1
FOXA3	forkhead box A3
FOXD1	forkhead box D1
FOXD4	forkhead box D4
FOXD4L1	forkhead box D4-like 1
FOXD4L2	forkhead box D4-like 2
FOXD4L3	forkhead box D4-like 3
FOXD4L4	forkhead box D4-like 4
FOXD4L5	forkhead box D4-like 5
FOXD4L6	forkhead box D4-like 6
FOXE1	forkhead box E1 (thyroid transcription factor 2)
FOXJ3	forkhead box J3
FOXN3-AS2	FOXN3 antisense RNA 2
FOXP2	forkhead box P2
FOXP3	forkhead box P3
FOXR2	forkhead box R2
FREM1	FRAS1 related extracellular matrix 1
FREM2	FRAS1 related extracellular matrix protein 2
FRG2	FSHD region gene 2
FRG2B	FSHD region gene 2 family, member B
FRG2C	FSHD region gene 2 family, member C
FRK	fyn-related kinase
FRMD1	FERM domain containing 1
FRMD4A	FERM domain containing 4A
FRMD7	FERM domain containing 7
FRMPD2	FERM and PDZ domain containing 2
FRMPD2P1	FERM and PDZ domain containing 2 pseudogene 1
FRMPD4	FERM and PDZ domain containing 4
FRMPDP2	FERM and PDZ domain containing 2 pseudogene 2
FSCB	fibrous sheath CABYR binding protein
FSCN3	fascin homolog 3, actin-bundling protein, testicular (Strongylocentrotus purpuratus)
FSHB	follicle stimulating hormone, beta polypeptide
FSHR	follicle stimulating hormone receptor
FTL	ferritin, light polypeptide
FTSJ2	FtsJ RNA methyltransferase homolog 2 (E. coli)
FTSJD1	FtsJ methyltransferase domain containing 1
FUNDC2P2	FUN14 domain containing 2 pseudogene 2
FUT1	fucosyltransferase 1 (galactoside 2-alpha-L-fucosyltransferase, H blood group)
FUT3	fucosyltransferase 3 (galactoside 3(4)-L-fucosyltransferase, Lewis blood group)
FXN	frataxin
FXYD2	FXYD domain containing ion transport regulator 2
FXYD6	FXYD domain containing ion transport regulator 6
FXYD7	FXYD domain containing ion transport regulator 7
FZR1	fizzy/cell division cycle 20 related 1 (Drosophila)
G6PC2	glucose-6-phosphatase, catalytic, 2
GAB2	GRB2-associated binding protein 2
GAB4	GRB2-associated binding protein family, member 4
GABRA1	gamma-aminobutyric acid (GABA) A receptor, alpha 1
GABRA3	gamma-aminobutyric acid (GABA) A receptor, alpha 3
GABRA4	gamma-aminobutyric acid (GABA) A receptor, alpha 4
GABRA6	gamma-aminobutyric acid (GABA) A receptor, alpha 6
GABRB1	gamma-aminobutyric acid (GABA) A receptor, beta 1
GABRE	gamma-aminobutyric acid (GABA) A receptor, epsilon
GABRG1	gamma-aminobutyric acid (GABA) A receptor, gamma 1
GABRG2	gamma-aminobutyric acid (GABA) A receptor, gamma 2
GABRP	gamma-aminobutyric acid (GABA) A receptor, pi
GABRR1	gamma-aminobutyric acid (GABA) A receptor, rho 1
GABRR2	gamma-aminobutyric acid (GABA) A receptor, rho 2
GAD1	glutamate decarboxylase 1 (brain, 67kDa)
GAGE10	G antigen 10
GAL3ST2	galactose-3-O-sulfotransferase 2
GALNS	galactosamine (N-acetyl)-6-sulfate sulfatase
GALNT10	UDP-N-acetyl-alpha-D-galactosamine:polypeptide N-acetylgalactosaminyltransferase 10 (GalNAc-T10)
GALNT8	UDP-N-acetyl-alpha-D-galactosamine:polypeptide N-acetylgalactosaminyltransferase 8 (GalNAc-T8)
GALP	galanin-like peptide
GAP43	growth associated protein 43
GAS2L2	growth arrest-specific 2 like 2
GAS6	growth arrest-specific 6
GAS7	growth arrest-specific 7
GATA1	GATA binding protein 1 (globin transcription factor 1)
GATSL1	GATS protein-like 1
GATSL2	GATS protein-like 2
GBA2	glucosidase, beta (bile acid) 2
GBA3	glucosidase, beta, acid 3 (cytosolic)
GBP1P1	guanylate binding protein 1, interferon-inducible pseudogene 1
GBP5	guanylate binding protein 5
GBP6	guanylate binding protein family, member 6
GCG	glucagon
GCK	glucokinase (hexokinase 4)
GCKR	glucokinase (hexokinase 4) regulator
GCM1	glial cells missing homolog 1 (Drosophila)
GCNT1	glucosaminyl (N-acetyl) transferase 1, core 2
GCNT2	glucosaminyl (N-acetyl) transferase 2, I-branching enzyme (I blood group)
GCNT4	glucosaminyl (N-acetyl) transferase 4, core 2
GCNT7	glucosaminyl (N-acetyl) transferase family member 7
GCSAM	germinal center-associated, signaling and motility
GCSAML	germinal center-associated, signaling and motility-like
GCSAML-AS1	GCSAML antisense RNA 1
GCSH	glycine cleavage system protein H (aminomethyl carrier)
GDA	guanine deaminase
GDAP1	ganglioside induced differentiation associated protein 1
GDPD2	glycerophosphodiester phosphodiesterase domain containing 2
GDPGP1	GDP-D-glucose phosphorylase 1
GET4	golgi to ER traffic protein 4 homolog (S. cerevisiae)
GFM1	G elongation factor, mitochondrial 1
GFRAL	GDNF family receptor alpha like
GGCT	gamma-glutamylcyclotransferase
GGT3P	gamma-glutamyltransferase 3 pseudogene
GGT5	gamma-glutamyltransferase 5
GGT6	gamma-glutamyltransferase 6
GGT8P	gamma-glutamyltransferase 8 pseudogene
GGTLC1	gamma-glutamyltransferase light chain 1
GGTLC2	gamma-glutamyltransferase light chain 2
GHRHR	growth hormone releasing hormone receptor
GHSR	growth hormone secretagogue receptor
GIF	gastric intrinsic factor (vitamin B synthesis)
GIMAP1	GTPase, IMAP family member 1
GIMAP2	GTPase, IMAP family member 2
GIMAP4	GTPase, IMAP family member 4
GIMAP5	GTPase, IMAP family member 5
GIMAP6	GTPase, IMAP family member 6
GIMAP7	GTPase, IMAP family member 7
GINS3	GINS complex subunit 3 (Psf3 homolog)
GJA10	gap junction protein, alpha 10, 62kDa
GJA5	gap junction protein, alpha 5, 40kDa
GJA8	gap junction protein, alpha 8, 50kDa
GJB1	gap junction protein, beta 1, 32kDa
GJB3	gap junction protein, beta 3, 31kDa
GJB4	gap junction protein, beta 4, 30.3kDa
GJB5	gap junction protein, beta 5, 31.1kDa
GJC3	gap junction protein, gamma 3, 30.2kDa
GK2	glycerol kinase 2
GK3P	glycerol kinase 3 pseudogene
GKAP1	G kinase anchoring protein 1
GLI2	GLI family zinc finger 2
GLIS3	GLIS family zinc finger 3
GLP2R	glucagon-like peptide 2 receptor
GLRA1	glycine receptor, alpha 1
GLRA2	glycine receptor, alpha 2
GLRX2	glutaredoxin 2
GLRX3	glutaredoxin 3
GLS2	glutaminase 2 (liver, mitochondrial)
GLYAT	glycine-N-acyltransferase
GLYATL2	glycine-N-acyltransferase-like 2
GLYCAM1	glycosylation dependent cell adhesion molecule 1 (pseudogene)
GML	glycosylphosphatidylinositol anchored molecule like protein
GNAI1	guanine nucleotide binding protein (G protein), alpha inhibiting activity polypeptide 1
GNG12	guanine nucleotide binding protein (G protein), gamma 12
GNG5	guanine nucleotide binding protein (G protein), gamma 5
GNG7	guanine nucleotide binding protein (G protein), gamma 7
GNLY	granulysin
GNRH2	gonadotropin-releasing hormone 2
GNRHR	gonadotropin-releasing hormone receptor
GNRHR2	gonadotropin-releasing hormone (type 2) receptor 2
GOLGA2P2Y	golgin A2 pseudogene 2, Y-linked
GOLGA2P3Y	golgin A2 pseudogene 3, Y-linked
GOLGA2P5	golgin A2 pseudogene 5
GOLGA6D	golgin A6 family, member D
GOLGA8A	golgin A8 family, member A
GOLGA8B	golgin A8 family, member B
GOLGA8IP	golgin A8 family, member I, pseudogene
GOLT1A	golgi transport 1A
GP2	glycoprotein 2 (zymogen granule membrane)
GP6	glycoprotein VI (platelet)
GPA33	glycoprotein A33 (transmembrane)
GPAT2	glycerol-3-phosphate acyltransferase 2, mitochondrial
GPC3	glypican 3
GPCPD1	glycerophosphocholine phosphodiesterase GDE1 homolog (S. cerevisiae)
GPHA2	glycoprotein hormone alpha 2
GPHB5	glycoprotein hormone beta 5
GPIHBP1	glycosylphosphatidylinositol anchored high density lipoprotein binding protein 1
GPKOW	G patch domain and KOW motifs
GPLD1	glycosylphosphatidylinositol specific phospholipase D1
GPM6A	glycoprotein M6A
GPM6B	glycoprotein M6B
GPR101	G protein-coupled receptor 101
GPR110	G protein-coupled receptor 110
GPR112	G protein-coupled receptor 112
GPR115	G protein-coupled receptor 115
GPR116	G protein-coupled receptor 116
GPR119	G protein-coupled receptor 119
GPR128	G protein-coupled receptor 128
GPR139	G protein-coupled receptor 139
GPR141	G protein-coupled receptor 141
GPR148	G protein-coupled receptor 148
GPR149	G protein-coupled receptor 149
GPR151	G protein-coupled receptor 151
GPR152	G protein-coupled receptor 152
GPR156	G protein-coupled receptor 156
GPR160	G protein-coupled receptor 160
GPR162	G protein-coupled receptor 162
GPR174	G protein-coupled receptor 174
GPR21	G protein-coupled receptor 21
GPR3	G protein-coupled receptor 3
GPR31	G protein-coupled receptor 31
GPR32	G protein-coupled receptor 32
GPR37L1	G protein-coupled receptor 37 like 1
GPR52	G protein-coupled receptor 52
GPR56	G protein-coupled receptor 56
GPR63	G protein-coupled receptor 63
GPR65	G protein-coupled receptor 65
GPR84	G protein-coupled receptor 84
GPR88	G protein-coupled receptor 88
GPR89A	G protein-coupled receptor 89A
GPR89B	G protein-coupled receptor 89B
GPR89C	G protein-coupled receptor 89C
GPRC5D	G protein-coupled receptor, family C, group 5, member D
GPRIN1	G protein regulated inducer of neurite outgrowth 1
GPT2	glutamic pyruvate transaminase (alanine aminotransferase) 2
GPX1	glutathione peroxidase 1
GPX5	glutathione peroxidase 5 (epididymal androgen-related protein)
GPX6	glutathione peroxidase 6 (olfactory)
GRAP2	GRB2-related adaptor protein 2
GRB10	growth factor receptor-bound protein 10
GREB1	growth regulation by estrogen in breast cancer 1
GRHL3	grainyhead-like 3 (Drosophila)
GRIA1	glutamate receptor, ionotropic, AMPA 1
GRIA4	glutamate receptor, ionotropic, AMPA 4
GRIK1	glutamate receptor, ionotropic, kainate 1
GRIK1-AS1	GRIK1 antisense RNA 1
GRIK4	glutamate receptor, ionotropic, kainate 4
GRIK5	glutamate receptor, ionotropic, kainate 5
GRIN1	glutamate receptor, ionotropic, N-methyl D-aspartate 1
GRIN2B	glutamate receptor, ionotropic, N-methyl D-aspartate 2B
GRIN2D	glutamate receptor, ionotropic, N-methyl D-aspartate 2D
GRIN3A	glutamate receptor, ionotropic, N-methyl-D-aspartate 3A
GRIP1	glutamate receptor interacting protein 1
GRIP2	glutamate receptor interacting protein 2
GRK1	G protein-coupled receptor kinase 1
GRM1	glutamate receptor, metabotropic 1
GRM3	glutamate receptor, metabotropic 3
GRM5	glutamate receptor, metabotropic 5
GRM6	glutamate receptor, metabotropic 6
GRM8	glutamate receptor, metabotropic 8
GRN	granulin
GRPR	gastrin-releasing peptide receptor
GRSF1	G-rich RNA sequence binding factor 1
GRXCR1	glutaredoxin, cysteine rich 1
GRXCR2	glutaredoxin, cysteine rich 2
GSC	goosecoid homeobox
GSDMD	gasdermin D
GSG1L	GSG1-like
GSR	glutathione reductase
GSTA1	glutathione S-transferase alpha 1
GSTA2	glutathione S-transferase alpha 2
GSTA3	glutathione S-transferase alpha 3
GSTA5	glutathione S-transferase alpha 5
GSTM2P1	glutathione S-transferase mu 2 (muscle) pseudogene 1
GSTM5P1	glutathione S-transferase mu 5 pseudogene 1
GTF2H2	general transcription factor IIH, polypeptide 2, 44kDa
GTF2H2B	general transcription factor IIH, polypeptide 2B (pseudogene)
GTF2H2C	general transcription factor IIH, polypeptide 2C
GTF2H2D	general transcription factor IIH, polypeptide 2D
GTF2IP1	general transcription factor IIi, pseudogene 1
GTF2IRD1	GTF2I repeat domain containing 1
GTF3A	general transcription factor IIIA
GTPBP8	GTP-binding protein 8 (putative)
GTSF1L	gametocyte specific factor 1-like
GUCA1B	guanylate cyclase activator 1B (retina)
GUCA1C	guanylate cyclase activator 1C
GUCA2B	guanylate cyclase activator 2B (uroguanylin)
GUCY1B2	guanylate cyclase 1, soluble, beta 2 (pseudogene)
GUCY2C	guanylate cyclase 2C (heat stable enterotoxin receptor)
GUCY2EP	guanylate cyclase 2E, pseudogene
GVINP1	GTPase, very large interferon inducible pseudogene 1
GYPA	glycophorin A (MNS blood group)
GZMB	granzyme B (granzyme 2, cytotoxic T-lymphocyte-associated serine esterase 1)
GZMH	granzyme H (cathepsin G-like 2, protein h-CCPX)
GZMK	granzyme K (granzyme 3; tryptase II)
H19	H19, imprinted maternally expressed transcript (non-protein coding)
H2AFY	H2A histone family, member Y
H2BFWT	H2B histone family, member W, testis-specific
H2BFXP	H2B histone family, member X, pseudogene
H3F3C	H3 histone, family 3C
HABP2	hyaluronan binding protein 2
HAGHL	hydroxyacylglutathione hydrolase-like
HAL	histidine ammonia-lyase
HAO1	hydroxyacid oxidase (glycolate oxidase) 1
HAPLN2	hyaluronan and proteoglycan link protein 2
HAPLN4	hyaluronan and proteoglycan link protein 4
HAR1A	highly accelerated region 1A (non-protein coding)
HAVCR1	hepatitis A virus cellular receptor 1
HAVCR1P1	hepatitis A virus cellular receptor 1 pseudogene 1
HAVCR2	hepatitis A virus cellular receptor 2
HBB	hemoglobin, beta
HBBP1	hemoglobin, beta pseudogene 1
HBD	hemoglobin, delta
HBE1	hemoglobin, epsilon 1
HBG1	hemoglobin, gamma A
HBG2	hemoglobin, gamma G
HCAR2	hydroxycarboxylic acid receptor 2
HCAR3	hydroxycarboxylic acid receptor 3
HCG26	HLA complex group 26 (non-protein coding)
HCG4	HLA complex group 4 (non-protein coding)
HCG9	HLA complex group 9 (non-protein coding)
HCLS1	hematopoietic cell-specific Lyn substrate 1
HCRTR2	hypocretin (orexin) receptor 2
HDAC8	histone deacetylase 8
HDC	histidine decarboxylase
HDHD3	haloacid dehalogenase-like hydrolase domain containing 3
HEATR2	HEAT repeat containing 2
HEATR7A	HEAT repeat containing 7A
HEATR7B2	HEAT repeat family member 7B2
HEATR8	HEAT repeat containing 8
HECA	headcase homolog (Drosophila)
HEMGN	hemogen
HEPACAM	hepatic and glial cell adhesion molecule
HEPACAM2	HEPACAM family member 2
HEPH	hephaestin
HEPHL1	hephaestin-like 1
HEPN1	hepatocellular carcinoma, down-regulated 1
HERC2P4	hect domain and RLD 2 pseudogene 4
HERPUD1	homocysteine-inducible, endoplasmic reticulum stress-inducible, ubiquitin-like domain member 1
HERPUD2	HERPUD family member 2
HES6	hairy and enhancer of split 6 (Drosophila)
HESX1	HESX homeobox 1
HGD	homogentisate 1,2-dioxygenase
HGF	hepatocyte growth factor (hepapoietin A; scatter factor)
HHIPL2	HHIP-like 2
HHLA1	HERV-H LTR-associating 1
HHLA2	HERV-H LTR-associating 2
HIGD1A	HIG1 hypoxia inducible domain family, member 1A
HIPK4	homeodomain interacting protein kinase 4
HIST1H2AA	histone cluster 1, H2aa
HIST1H2BA	histone cluster 1, H2ba
HK1	hexokinase 1
HLA-DMA	major histocompatibility complex, class II, DM alpha
HLA-DOA	major histocompatibility complex, class II, DO alpha
HLA-DPA1	major histocompatibility complex, class II, DP alpha 1
HLA-DPB1	major histocompatibility complex, class II, DP beta 1
HLA-DPB2	major histocompatibility complex, class II, DP beta 2 (pseudogene)
HLA-DQA1	major histocompatibility complex, class II, DQ alpha 1
HLA-DQA2	major histocompatibility complex, class II, DQ alpha 2
HLA-DQB1	major histocompatibility complex, class II, DQ beta 1
HLA-DQB2	major histocompatibility complex, class II, DQ beta 2
HLA-DRA	major histocompatibility complex, class II, DR alpha
HLA-DRB5	major histocompatibility complex, class II, DR beta 5
HLA-DRB6	major histocompatibility complex, class II, DR beta 6 (pseudogene)
HLA-F-AS1	HLA-F antisense RNA 1
HLA-J	major histocompatibility complex, class I, J (pseudogene)
HLF	hepatic leukemia factor
HMBS	hydroxymethylbilane synthase
HMGB3	high mobility group box 3
HMGCLL1	3-hydroxymethyl-3-methylglutaryl-CoA lyase-like 1
HMGCR	3-hydroxy-3-methylglutaryl-CoA reductase
HMGCS1	3-hydroxy-3-methylglutaryl-CoA synthase 1 (soluble)
HMGCS2	3-hydroxy-3-methylglutaryl-CoA synthase 2 (mitochondrial)
HMGN5	high mobility group nucleosome binding domain 5
HMHB1	histocompatibility (minor) HB-1
HMP19	HMP19 protein
HNF4A	hepatocyte nuclear factor 4, alpha
HNRNPCL1	heterogeneous nuclear ribonucleoprotein C-like 1
HOTAIR	HOX transcript antisense RNA
HP	haptoglobin
HPR	haptoglobin-related protein
HPS4	Hermansky-Pudlak syndrome 4
HPVC1	human papillomavirus (type 18) E5 central sequence-like 1
HPX	hemopexin
HPYR1	Helicobacter pylori responsive 1 (non-protein coding)
HRASLS2	HRAS-like suppressor 2
HRC	histidine rich calcium binding protein
HRG	histidine-rich glycoprotein
HRH2	histamine receptor H2
HRK	harakiri, BCL2 interacting protein (contains only BH3 domain)
HS1BP3	HCLS1 binding protein 3
HS3ST4	heparan sulfate (glucosamine) 3-O-sulfotransferase 4
HS3ST5	heparan sulfate (glucosamine) 3-O-sulfotransferase 5
HS6ST2	heparan sulfate 6-O-sulfotransferase 2
HSD17B2	hydroxysteroid (17-beta) dehydrogenase 2
HSD17B3	hydroxysteroid (17-beta) dehydrogenase 3
HSD17B4	hydroxysteroid (17-beta) dehydrogenase 4
HSD17B7P2	hydroxysteroid (17-beta) dehydrogenase 7 pseudogene 2
HSD3B1	hydroxy-delta-5-steroid dehydrogenase, 3 beta- and steroid delta-isomerase 1
HSD3B7	hydroxy-delta-5-steroid dehydrogenase, 3 beta- and steroid delta-isomerase 7
HSH2D	hematopoietic SH2 domain containing
HSP90AB2P	heat shock protein 90kDa alpha (cytosolic), class B member 2, pseudogene
HSPA6	heat shock 70kDa protein 6 (HSP70B')
HSPB1P1	heat shock 27kDa protein 1 pseudogene 1
HSPB3	heat shock 27kDa protein 3
HTA	uncharacterized LOC283902
HTN1	histatin 1
HTN3	histatin 3
HTR1D	5-hydroxytryptamine (serotonin) receptor 1D, G protein-coupled
HTR1F	5-hydroxytryptamine (serotonin) receptor 1F, G protein-coupled
HTR2A	5-hydroxytryptamine (serotonin) receptor 2A, G protein-coupled
HTR3A	5-hydroxytryptamine (serotonin) receptor 3A, ionotropic
HTR3B	5-hydroxytryptamine (serotonin) receptor 3B, ionotropic
HTR3D	5-hydroxytryptamine (serotonin) receptor 3D, ionotropic
HTR3E	5-hydroxytryptamine (serotonin) receptor 3E, ionotropic
HTR4	5-hydroxytryptamine (serotonin) receptor 4, G protein-coupled
HTR5A	5-hydroxytryptamine (serotonin) receptor 5A, G protein-coupled
HULC	highly up-regulated in liver cancer (non-protein coding)
HYAL4	hyaluronoglucosaminidase 4
HYDIN	HYDIN, axonemal central pair apparatus protein
IAPP	islet amyloid polypeptide
ICAM1	intercellular adhesion molecule 1
ICAM2	intercellular adhesion molecule 2
ICOS	inducible T-cell co-stimulator
IDH1	isocitrate dehydrogenase 1 (NADP+), soluble
IDO2	indoleamine 2,3-dioxygenase 2
IDS	iduronate 2-sulfatase
IER3IP1	immediate early response 3 interacting protein 1
IFFO2	intermediate filament family orphan 2
IFIT1B	interferon-induced protein with tetratricopeptide repeats 1B
IFIT5	interferon-induced protein with tetratricopeptide repeats 5
IFITM4P	interferon induced transmembrane protein 4 pseudogene
IFNA10	interferon, alpha 10
IFNA13	interferon, alpha 13
IFNA17	interferon, alpha 17
IFNA4	interferon, alpha 4
IFNA7	interferon, alpha 7
IFNK	interferon, kappa
IFNW1	interferon, omega 1
IGBP1P1	immunoglobulin (CD79A) binding protein 1 pseudogene 1
IGFALS	insulin-like growth factor binding protein, acid labile subunit
IGFBP4	insulin-like growth factor binding protein 4
IGFL1	IGF-like family member 1
IGFL2	IGF-like family member 2
IGFL3	IGF-like family member 3
IGFL4	IGF-like family member 4
IGLL3P	immunoglobulin lambda-like polypeptide 3, pseudogene
IGSF1	immunoglobulin superfamily, member 1
IGSF22	immunoglobulin superfamily, member 22
IGSF3	immunoglobulin superfamily, member 3
IGSF5	immunoglobulin superfamily, member 5
IGSF6	immunoglobulin superfamily, member 6
IL10RA	interleukin 10 receptor, alpha
IL12B	interleukin 12B (natural killer cell stimulatory factor 2, cytotoxic lymphocyte maturation factor 2, p40)
IL16	interleukin 16
IL17A	interleukin 17A
IL17F	interleukin 17F
IL17RE	interleukin 17 receptor E
IL18RAP	interleukin 18 receptor accessory protein
IL19	interleukin 19
IL1B	interleukin 1, beta
IL1F10	interleukin 1 family, member 10 (theta)
IL1R1	interleukin 1 receptor, type I
IL1R2	interleukin 1 receptor, type II
IL1RAPL1	interleukin 1 receptor accessory protein-like 1
IL1RAPL2	interleukin 1 receptor accessory protein-like 2
IL1RN	interleukin 1 receptor antagonist
IL20	interleukin 20
IL22RA2	interleukin 22 receptor, alpha 2
IL23R	interleukin 23 receptor
IL27	interleukin 27
IL28A	interleukin 28A (interferon, lambda 2)
IL29	interleukin 29 (interferon, lambda 1)
IL2RA	interleukin 2 receptor, alpha
IL2RG	interleukin 2 receptor, gamma
IL3	interleukin 3 (colony-stimulating factor, multiple)
IL34	interleukin 34
IL36A	interleukin 36, alpha
IL36G	interleukin 36, gamma
IL36RN	interleukin 36 receptor antagonist
IL37	interleukin 37
IL3RA	interleukin 3 receptor, alpha (low affinity)
IL5RA	interleukin 5 receptor, alpha
IL7	interleukin 7
IL9R	interleukin 9 receptor
IMPDH1	IMP (inosine 5'-monophosphate) dehydrogenase 1
IMPDH2	IMP (inosine 5'-monophosphate) dehydrogenase 2
IMPG1	interphotoreceptor matrix proteoglycan 1
INE2	inactivation escape 2 (non-protein coding)
INPP5F	inositol polyphosphate-5-phosphatase F
INSC	inscuteable homolog (Drosophila)
INSL4	insulin-like 4 (placenta)
INSL5	insulin-like 5
INTS4L1	integrator complex subunit 4-like 1
INTS4L2	integrator complex subunit 4-like 2
IP6K2	inositol hexakisphosphate kinase 2
IPCEF1	interaction protein for cytohesin exchange factors 1
IPW	imprinted in Prader-Willi syndrome (non-protein coding)
IQCF1	IQ motif containing F1
IQCF3	IQ motif containing F3
IQCF5	IQ motif containing F5
IQCF6	IQ motif containing F6
IQCJ	IQ motif containing J
IQCK	IQ motif containing K
IQGAP2	IQ motif containing GTPase activating protein 2
IQSEC1	IQ motif and Sec7 domain 1
IQSEC2	IQ motif and Sec7 domain 2
IQSEC3	IQ motif and Sec7 domain 3
ISCA1P1	iron-sulfur cluster assembly 1 homolog (S. cerevisiae) pseudogene 1
ISM1	isthmin 1 homolog (zebrafish)
ISX	intestine-specific homeobox
ISYNA1	inositol-3-phosphate synthase 1
ITGA10	integrin, alpha 10
ITGA2B	integrin, alpha 2b (platelet glycoprotein IIb of IIb/IIIa complex, antigen CD41)
ITGAD	integrin, alpha D
ITGAX	integrin, alpha X (complement component 3 receptor 4 subunit)
ITGB1BP2	integrin beta 1 binding protein (melusin) 2
ITIH1	inter-alpha-trypsin inhibitor heavy chain 1
ITIH2	inter-alpha-trypsin inhibitor heavy chain 2
ITIH3	inter-alpha-trypsin inhibitor heavy chain 3
ITIH5	inter-alpha-trypsin inhibitor heavy chain family, member 5
ITIH6	inter-alpha-trypsin inhibitor heavy chain family, member 6
ITLN1	intelectin 1 (galactofuranose binding)
ITM2A	integral membrane protein 2A
IVL	involucrin
IZUMO2	IZUMO family member 2
JAKMIP2	janus kinase and microtubule interacting protein 2
JPH4	junctophilin 4
KAAG1	kidney associated antigen 1
KALRN	kalirin, RhoGEF kinase
KAZN	kazrin, periplakin interacting protein
KBTBD10	kelch repeat and BTB (POZ) domain containing 10
KBTBD5	kelch repeat and BTB (POZ) domain containing 5
KC6	keratoconus gene 6
KCNA10	potassium voltage-gated channel, shaker-related subfamily, member 10
KCNAB1	potassium voltage-gated channel, shaker-related subfamily, beta member 1
KCNAB2	potassium voltage-gated channel, shaker-related subfamily, beta member 2
KCNB2	potassium voltage-gated channel, Shab-related subfamily, member 2
KCNE1	potassium voltage-gated channel, Isk-related family, member 1
KCNG4	potassium voltage-gated channel, subfamily G, member 4
KCNH2	potassium voltage-gated channel, subfamily H (eag-related), member 2
KCNH5	potassium voltage-gated channel, subfamily H (eag-related), member 5
KCNH7	potassium voltage-gated channel, subfamily H (eag-related), member 7
KCNIP1	Kv channel interacting protein 1
KCNIP2	Kv channel interacting protein 2
KCNIP4	Kv channel interacting protein 4
KCNJ11	potassium inwardly-rectifying channel, subfamily J, member 11
KCNJ16	potassium inwardly-rectifying channel, subfamily J, member 16
KCNJ4	potassium inwardly-rectifying channel, subfamily J, member 4
KCNK1	potassium channel, subfamily K, member 1
KCNK10	potassium channel, subfamily K, member 10
KCNK16	potassium channel, subfamily K, member 16
KCNK17	potassium channel, subfamily K, member 17
KCNK18	potassium channel, subfamily K, member 18
KCNMB1	potassium large conductance calcium-activated channel, subfamily M, beta member 1
KCNMB2	potassium large conductance calcium-activated channel, subfamily M, beta member 2
KCNMB3	potassium large conductance calcium-activated channel, subfamily M beta member 3
KCNN2	potassium intermediate/small conductance calcium-activated channel, subfamily N, member 2
KCNN3	potassium intermediate/small conductance calcium-activated channel, subfamily N, member 3
KCNN4	potassium intermediate/small conductance calcium-activated channel, subfamily N, member 4
KCNQ3	potassium voltage-gated channel, KQT-like subfamily, member 3
KCNS3	potassium voltage-gated channel, delayed-rectifier, subfamily S, member 3
KCNT1	potassium channel, subfamily T, member 1
KCNT2	potassium channel, subfamily T, member 2
KCNU1	potassium channel, subfamily U, member 1
KCTD1	potassium channel tetramerisation domain containing 1
KDELR1	KDEL (Lys-Asp-Glu-Leu) endoplasmic reticulum protein retention receptor 1
KEL	Kell blood group, metallo-endopeptidase
KGFLP1	fibroblast growth factor 7 pseudogene
KHDC1L	KH homology domain containing 1-like
KIAA0087	KIAA0087
KIAA0125	KIAA0125
KIAA0930	KIAA0930
KIAA1024	KIAA1024
KIAA1210	KIAA1210
KIAA1211	KIAA1211
KIAA1217	KIAA1217
KIAA1257	KIAA1257
KIAA1462	KIAA1462
KIAA1549	KIAA1549
KIAA1551	KIAA1551
KIAA1671	KIAA1671
KIAA1755	KIAA1755
KIAA1984	KIAA1984
KIF18B	kinesin family member 18B
KIF25	kinesin family member 25
KIF2B	kinesin family member 2B
KIF4A	kinesin family member 4A
KIF4B	kinesin family member 4B
KIR2DL1	killer cell immunoglobulin-like receptor, two domains, long cytoplasmic tail, 1
KIR2DL2	killer cell immunoglobulin-like receptor, two domains, long cytoplasmic tail, 2
KIR2DL3	killer cell immunoglobulin-like receptor, two domains, long cytoplasmic tail, 3
KIR2DL4	killer cell immunoglobulin-like receptor, two domains, long cytoplasmic tail, 4
KIR2DL5A	killer cell immunoglobulin-like receptor, two domains, long cytoplasmic tail, 5A
KIR2DL5B	killer cell immunoglobulin-like receptor, two domains, long cytoplasmic tail, 5B
KIR2DS1	killer cell immunoglobulin-like receptor, two domains, short cytoplasmic tail, 1
KIR2DS2	killer cell immunoglobulin-like receptor, two domains, short cytoplasmic tail, 2
KIR2DS3	killer cell immunoglobulin-like receptor, two domains, short cytoplasmic tail, 3
[truncated: 2,818 more rows]

## Sheet: LMNA, upstream-distal
Table S1 (cont.). Genes enriched in LMNA in the upstream-distal promoter region
symbol	description	redundant with at least one other region
A2ML1	alpha-2-macroglobulin-like 1	*
AACSP1	acetoacetyl-CoA synthetase pseudogene 1	*
AADAC	arylacetamide deacetylase	*
AADACL3	arylacetamide deacetylase-like 3	*
AADACL4	arylacetamide deacetylase-like 4
AADAT	aminoadipate aminotransferase
AAED1	AhpC/TSA antioxidant enzyme domain containing 1
AASDH	aminoadipate-semialdehyde dehydrogenase
ABCA1	ATP-binding cassette, sub-family A (ABC1), member 1
ABCA12	ATP-binding cassette, sub-family A (ABC1), member 12
ABCA2	ATP-binding cassette, sub-family A (ABC1), member 2
ABCA5	ATP-binding cassette, sub-family A (ABC1), member 5
ABCB1	ATP-binding cassette, sub-family B (MDR/TAP), member 1
ABCB11	ATP-binding cassette, sub-family B (MDR/TAP), member 11	*
ABCC11	ATP-binding cassette, sub-family C (CFTR/MRP), member 11	*
ABCG1	ATP-binding cassette, sub-family G (WHITE), member 1
ABHD3	abhydrolase domain containing 3
ABLIM1	actin binding LIM protein 1	*
ABP1	amiloride binding protein 1 (amine oxidase (copper-containing))	*
ACCSL	1-aminocyclopropane-1-carboxylate synthase homolog (Arabidopsis)(non-functional)-like
ACOT9	acyl-CoA thioesterase 9
ACOX2	acyl-CoA oxidase 2, branched chain
ACOXL	acyl-CoA oxidase-like
ACPP	acid phosphatase, prostate
ACSBG1	acyl-CoA synthetase bubblegum family member 1
ACSBG2	acyl-CoA synthetase bubblegum family member 2
ACSM1	acyl-CoA synthetase medium-chain family member 1	*
ACSM3	acyl-CoA synthetase medium-chain family member 3
ACSM5	acyl-CoA synthetase medium-chain family member 5
ACTA1	actin, alpha 1, skeletal muscle
ACTL8	actin-like 8
ACTL9	actin-like 9
ACTRT1	actin-related protein T1	*
ADAM20	ADAM metallopeptidase domain 20
ADAM7	ADAM metallopeptidase domain 7
ADAMDEC1	ADAM-like, decysin 1
ADARB2	adenosine deaminase, RNA-specific, B2
ADARB2-AS1	ADARB2 antisense RNA 1	*
ADH1B	alcohol dehydrogenase 1B (class I), beta polypeptide
ADH1C	alcohol dehydrogenase 1C (class I), gamma polypeptide
ADH7	alcohol dehydrogenase 7 (class IV), mu or sigma polypeptide
ADIG	adipogenin
ADM2	adrenomedullin 2	*
ADSS	adenylosuccinate synthase
ADTRP	androgen-dependent TFPI-regulating protein
AGA	aspartylglucosaminidase
AGMAT	agmatine ureohydrolase (agmatinase)
AGPAT4-IT1	AGPAT4 intronic transcript 1 (non-protein coding)	*
AGT	angiotensinogen (serpin peptidase inhibitor, clade A, member 8)
AHCYL2	adenosylhomocysteinase-like 2
AHRR	aryl-hydrocarbon receptor repressor	*
AHSA2	AHA1, activator of heat shock 90kDa protein ATPase homolog 2 (yeast)
AICDA	activation-induced cytidine deaminase
AIFM1	apoptosis-inducing factor, mitochondrion-associated, 1
AIRE	autoimmune regulator
AJUBA	ajuba LIM protein
AKAP1	A kinase (PRKA) anchor protein 1
AKAP7	A kinase (PRKA) anchor protein 7
AKR1CL1	aldo-keto reductase family 1, member C-like 1	*
ALDH1A1	aldehyde dehydrogenase 1 family, member A1	*
ALDH3A1	aldehyde dehydrogenase 3 family, member A1	*
ALDOB	aldolase B, fructose-bisphosphate
ALG1L2	asparagine-linked glycosylation 1-like 2	*
ALKBH3	alkB, alkylation repair homolog 3 (E. coli)
ALKBH6	alkB, alkylation repair homolog 6 (E. coli)
ALPK3	alpha-kinase 3
ALPP	alkaline phosphatase, placental
ANAPC7	anaphase promoting complex subunit 7
ANGPT4	angiopoietin 4
ANGPTL2	angiopoietin-like 2
ANK2	ankyrin 2, neuronal
ANKRD18DP	ankyrin repeat domain 18D, pseudogene
ANKRD20A4	ankyrin repeat domain 20 family, member A4
ANKRD26P1	ankyrin repeat domain 26 pseudogene 1
ANKRD26P3	ankyrin repeat domain 26 pseudogene 3
ANKRD36B	ankyrin repeat domain 36B
ANKRD7	ankyrin repeat domain 7	*
ANO5	anoctamin 5
AOC2	amine oxidase, copper containing 2 (retina-specific)
APCDD1	adenomatosis polyposis coli down-regulated 1
APEX2	APEX nuclease (apurinic/apyrimidinic endonuclease) 2
API5	apoptosis inhibitor 5
APLNR	apelin receptor
APOB	apolipoprotein B (including Ag(x) antigen)
APOBEC2	apolipoprotein B mRNA editing enzyme, catalytic polypeptide-like 2
APOBEC3C	apolipoprotein B mRNA editing enzyme, catalytic polypeptide-like 3C
APOD	apolipoprotein D	*
APP	amyloid beta (A4) precursor protein
AQP7	aquaporin 7
AQP9	aquaporin 9
ARFIP2	ADP-ribosylation factor interacting protein 2
ARHGDIB	Rho GDP dissociation inhibitor (GDI) beta	*
ARMC10	armadillo repeat containing 10
ARMC8	armadillo repeat containing 8
ARMCX6	armadillo repeat containing, X-linked 6
ASAH2	N-acylsphingosine amidohydrolase (non-lysosomal ceramidase) 2
ASB10	ankyrin repeat and SOCS box containing 10
ASB9	ankyrin repeat and SOCS box containing 9
ASGR2	asialoglycoprotein receptor 2
ASIC2	acid-sensing (proton-gated) ion channel 2
ASTN2	astrotactin 2
ASXL2	additional sex combs like 2 (Drosophila)
ATAT1	alpha tubulin acetyltransferase 1
ATF7IP2	activating transcription factor 7 interacting protein 2
ATG9B	autophagy related 9B
ATP13A4	ATPase type 13A4	*
ATP1B4	ATPase, Na+/K+ transporting, beta 4 polypeptide	*
ATP2A3	ATPase, Ca++ transporting, ubiquitous
ATP4A	ATPase, H+/K+ exchanging, alpha polypeptide
ATP5EP2	ATP synthase, H+ transporting, mitochondrial F1 complex, epsilon subunit pseudogene 2	*
ATP5G3	ATP synthase, H+ transporting, mitochondrial Fo complex, subunit C3 (subunit 9)
ATP6V0A4	ATPase, H+ transporting, lysosomal V0 subunit a4	*
ATP6V1B2	ATPase, H+ transporting, lysosomal 56/58kDa, V1 subunit B2
ATP7A	ATPase, Cu++ transporting, alpha polypeptide
ATPAF1	ATP synthase mitochondrial F1 complex assembly factor 1
AUNIP	aurora kinase A and ninein interacting protein
AURKAPS1	aurora kinase A pseudogene 1	*
AURKC	aurora kinase C	*
AXL	AXL receptor tyrosine kinase
B3GALT5	UDP-Gal:betaGlcNAc beta 1,3-galactosyltransferase, polypeptide 5	*
B3GAT1	beta-1,3-glucuronyltransferase 1 (glucuronosyltransferase P)
BAAT	bile acid CoA: amino acid N-acyltransferase (glycine N-choloyltransferase)	*
BACE2	beta-site APP-cleaving enzyme 2
BANF2	barrier to autointegration factor 2	*
BCHE	butyrylcholinesterase
BCL2L14	BCL2-like 14 (apoptosis facilitator)	*
BCRP3	breakpoint cluster region pseudogene 3	*
BCYRN1	brain cytoplasmic RNA 1
BDH1	3-hydroxybutyrate dehydrogenase, type 1
BIN3	bridging integrator 3
BLCAP	bladder cancer associated protein
BLK	B lymphoid tyrosine kinase
BLMH	bleomycin hydrolase
BLNK	B-cell linker	*
BMP15	bone morphogenetic protein 15	*
BMP3	bone morphogenetic protein 3	*
BMS1	BMS1 homolog, ribosome assembly protein (yeast)
BMX	BMX non-receptor tyrosine kinase
BNIPL	BCL2/adenovirus E1B 19kD interacting protein like	*
BPIFA2	BPI fold containing family A, member 2
BPIFA3	BPI fold containing family A, member 3	*
BPIFB1	BPI fold containing family B, member 1	*
BPIFC	BPI fold containing family C	*
BRCA1	breast cancer 1, early onset
BRDT	bromodomain, testis-specific	*
BST2	bone marrow stromal cell antigen 2
BTBD11	BTB (POZ) domain containing 11
BTBD16	BTB (POZ) domain containing 16
BTBD17	BTB (POZ) domain containing 17
BTK	Bruton agammaglobulinemia tyrosine kinase	*
BTN2A2	butyrophilin, subfamily 2, member A2
BTNL2	butyrophilin-like 2 (MHC class II associated)
BTNL3	butyrophilin-like 3	*
BUD13	BUD13 homolog (S. cerevisiae)
C10orf40	chromosome 10 open reading frame 40
C10orf88	chromosome 10 open reading frame 88
C11orf31	chromosome 11 open reading frame 31
C11orf40	chromosome 11 open reading frame 40	*
C11orf42	chromosome 11 open reading frame 42
C11orf53	chromosome 11 open reading frame 53	*
C11orf75	chromosome 11 open reading frame 75
C12orf45	chromosome 12 open reading frame 45
C12orf5	chromosome 12 open reading frame 5
C13orf35	chromosome 13 open reading frame 35
C14orf101	chromosome 14 open reading frame 101
C17orf101	chromosome 17 open reading frame 101
C17orf47	chromosome 17 open reading frame 47	*
C17orf77	chromosome 17 open reading frame 77	*
C17orf97	chromosome 17 open reading frame 97
C18orf56	chromosome 18 open reading frame 56
C18orf8	chromosome 18 open reading frame 8
C19orf48	chromosome 19 open reading frame 48
C1QB	complement component 1, q subcomponent, B chain
C1QTNF7	C1q and tumor necrosis factor related protein 7
C1S	complement component 1, s subcomponent
C1orf100	chromosome 1 open reading frame 100
C1orf123	chromosome 1 open reading frame 123
C1orf146	chromosome 1 open reading frame 146	*
C1orf162	chromosome 1 open reading frame 162
C1orf226	chromosome 1 open reading frame 226	*
C1orf74	chromosome 1 open reading frame 74
C1orf95	chromosome 1 open reading frame 95
C2	complement component 2
C20orf141	chromosome 20 open reading frame 141
C20orf152	chromosome 20 open reading frame 152	*
C20orf197	chromosome 20 open reading frame 197	*
C20orf85	chromosome 20 open reading frame 85
C21orf59	chromosome 21 open reading frame 59
C21orf62	chromosome 21 open reading frame 62
C22orf28	chromosome 22 open reading frame 28
C2orf27A	chromosome 2 open reading frame 27A	*
C2orf40	chromosome 2 open reading frame 40
C2orf44	chromosome 2 open reading frame 44
C2orf57	chromosome 2 open reading frame 57
C2orf62	chromosome 2 open reading frame 62
C2orf80	chromosome 2 open reading frame 80	*
C2orf83	chromosome 2 open reading frame 83
C2orf88	chromosome 2 open reading frame 88	*
C3orf15	chromosome 3 open reading frame 15
C3orf32	chromosome 3 open reading frame 32	*
C3orf52	chromosome 3 open reading frame 52
C4orf19	chromosome 4 open reading frame 19
C4orf27	chromosome 4 open reading frame 27
C5AR1	complement component 5a receptor 1
C5orf25	chromosome 5 open reading frame 25
C5orf30	chromosome 5 open reading frame 30
C5orf34	chromosome 5 open reading frame 34
C5orf46	chromosome 5 open reading frame 46
C6	complement component 6
C7	complement component 7
C8B	complement component 8, beta polypeptide
C8orf4	chromosome 8 open reading frame 4
C8orf74	chromosome 8 open reading frame 74
CABIN1	calcineurin binding protein 1
CACNA1B	calcium channel, voltage-dependent, N type, alpha 1B subunit
CACNB2	calcium channel, voltage-dependent, beta 2 subunit	*
CACNB4	calcium channel, voltage-dependent, beta 4 subunit
CACNG5	calcium channel, voltage-dependent, gamma subunit 5	*
CADM3	cell adhesion molecule 3	*
CALR	calreticulin
CAPN11	calpain 11
CAPN12	calpain 12
CAPN14	calpain 14	*
CAPN8	calpain 8
CAPN9	calpain 9
CAPSL	calcyphosine-like	*
CARD11	caspase recruitment domain family, member 11
CASP14	caspase 14, apoptosis-related cysteine peptidase	*
CASQ1	calsequestrin 1 (fast-twitch, skeletal muscle)
CASR	calcium-sensing receptor
CATSPER3	cation channel, sperm associated 3
CAV3	caveolin 3
CBX6	chromobox homolog 6
CCDC102B	coiled-coil domain containing 102B
CCDC124	coiled-coil domain containing 124
CCDC144C	coiled-coil domain containing 144C
CCDC151	coiled-coil domain containing 151
CCDC163P	coiled-coil domain containing 163, pseudogene
CCDC53	coiled-coil domain containing 53
CCDC60	coiled-coil domain containing 60
CCDC78	coiled-coil domain containing 78
CCDC87	coiled-coil domain containing 87
CCL16	chemokine (C-C motif) ligand 16	*
CCL23	chemokine (C-C motif) ligand 23	*
CCL24	chemokine (C-C motif) ligand 24	*
CCL3	chemokine (C-C motif) ligand 3	*
CCL3L1	chemokine (C-C motif) ligand 3-like 1	*
CCL3L3	chemokine (C-C motif) ligand 3-like 3	*
CCNL1	cyclin L1
CCR4	chemokine (C-C motif) receptor 4
CCR5	chemokine (C-C motif) receptor 5 (gene/pseudogene)	*
CCR6	chemokine (C-C motif) receptor 6	*
CCR8	chemokine (C-C motif) receptor 8
CCR9	chemokine (C-C motif) receptor 9	*
CCRL2	chemokine (C-C motif) receptor-like 2
CCSAP	centriole, cilia and spindle-associated protein
CD109	CD109 molecule
CD1A	CD1a molecule	*
CD1C	CD1c molecule	*
CD200R1L	CD200 receptor 1-like
CD226	CD226 molecule	*
CD247	CD247 molecule
CD300LD	CD300 molecule-like family member d	*
CD40	CD40 molecule, TNF receptor superfamily member 5
CD40LG	CD40 ligand
CD48	CD48 molecule	*
CD84	CD84 molecule
CD8B	CD8b molecule
CDC14C	CDC14 cell division cycle 14 homolog C (S. cerevisiae)
CDC42BPA	CDC42 binding protein kinase alpha (DMPK-like)
CDH12	cadherin 12, type 2 (N-cadherin 2)	*
CDH19	cadherin 19, type 2
CDH20	cadherin 20, type 2
CDH24	cadherin 24, type 2
CDH26	cadherin 26	*
CDK1	cyclin-dependent kinase 1
CDK14	cyclin-dependent kinase 14
CDK18	cyclin-dependent kinase 18
CDKN2AIPNL	CDKN2A interacting protein N-terminal like
CDO1	cysteine dioxygenase, type I
CDON	Cdon homolog (mouse)
CDRT1	CMT1A duplicated region transcript 1
CDYL	chromodomain protein, Y-like	*
CEACAM18	carcinoembryonic antigen-related cell adhesion molecule 18
CEACAM3	carcinoembryonic antigen-related cell adhesion molecule 3	*
CEACAM5	carcinoembryonic antigen-related cell adhesion molecule 5	*
CECR2	cat eye syndrome chromosome region, candidate 2	*
CECR7	cat eye syndrome chromosome region, candidate 7 (non-protein coding)
CENPE	centromere protein E, 312kDa
CEP72	centrosomal protein 72kDa
CEP78	centrosomal protein 78kDa
CES1P1	carboxylesterase 1 pseudogene 1
CES2	carboxylesterase 2
CFC1	cripto, FRL-1, cryptic family 1	*
CFC1B	cripto, FRL-1, cryptic family 1B	*
CFDP1	craniofacial development protein 1
CFH	complement factor H
CHD3	chromodomain helicase DNA binding protein 3
CHFR	checkpoint with forkhead and ring finger domains, E3 ubiquitin protein ligase
CHGA	chromogranin A (parathyroid secretory protein 1)	*
CHIA	chitinase, acidic
CHODL	chondrolectin
CHP2	calcineurin-like EF hand protein 2
CHRFAM7A	CHRNA7 (cholinergic receptor, nicotinic, alpha 7, exons 5-10) and FAM7A (family with sequence similarity 7A, exons A-E) fusion
CHRNA2	cholinergic receptor, nicotinic, alpha 2 (neuronal)
CHRNB1	cholinergic receptor, nicotinic, beta 1 (muscle)
CHRNB2	cholinergic receptor, nicotinic, beta 2 (neuronal)
CHRNE	cholinergic receptor, nicotinic, epsilon (muscle)
CIB4	calcium and integrin binding family member 4	*
CIDEA	cell death-inducing DFFA-like effector a
CKB	creatine kinase, brain
CKMT2	creatine kinase, mitochondrial 2 (sarcomeric)
CLCA1	chloride channel accessory 1
CLCN4	chloride channel, voltage-sensitive 4
CLDN10	claudin 10	*
CLDN14	claudin 14	*
CLDN17	claudin 17	*
CLDN2	claudin 2
CLDN20	claudin 20
CLDN25	claudin 25	*
CLEC18A	C-type lectin domain family 18, member A
CLEC18B	C-type lectin domain family 18, member B
CLEC18C	C-type lectin domain family 18, member C
CLEC1A	C-type lectin domain family 1, member A
CLEC4F	C-type lectin domain family 4, member F	*
CLK3	CDC-like kinase 3	*
CLRN1	clarin 1	*
CLRN3	clarin 3
CLSTN3	calsyntenin 3
CLVS1	clavesin 1	*
CLYBL	citrate lyase beta like
CMA1	chymase 1, mast cell	*
CMKLR1	chemokine-like receptor 1	*
CMTM8	CKLF-like MARVEL transmembrane domain containing 8
CN5H6.4	uncharacterized LOC150384
CNIH	cornichon homolog (Drosophila)
CNPY1	canopy 1 homolog (zebrafish)
CNPY2	canopy 2 homolog (zebrafish)
CNR1	cannabinoid receptor 1 (brain)	*
CNTN2	contactin 2 (axonal)
COA3	cytochrome C oxidase assembly factor 3
COG2	component of oligomeric golgi complex 2
COL20A1	collagen, type XX, alpha 1
COL22A1	collagen, type XXII, alpha 1	*
COL4A5	collagen, type IV, alpha 5	*
COL4A6	collagen, type IV, alpha 6	*
COL6A6	collagen, type VI, alpha 6	*
COL7A1	collagen, type VII, alpha 1
COL9A2	collagen, type IX, alpha 2
COMT	catechol-O-methyltransferase
COPG2	coatomer protein complex, subunit gamma 2
COPS3	COP9 constitutive photomorphogenic homolog subunit 3 (Arabidopsis)
CORO1B	coronin, actin binding protein, 1B
CPA2	carboxypeptidase A2 (pancreatic)
CPD	carboxypeptidase D
CPEB1	cytoplasmic polyadenylation element binding protein 1
CPLX2	complexin 2
CPLX4	complexin 4
CPN2	carboxypeptidase N, polypeptide 2
CPNE4	copine IV
CPO	carboxypeptidase O
CPSF1	cleavage and polyadenylation specific factor 1, 160kDa
CPXM2	carboxypeptidase X (M14 family), member 2
CRABP1	cellular retinoic acid binding protein 1
CRB1	crumbs homolog 1 (Drosophila)
CRBN	cereblon
CREB5	cAMP responsive element binding protein 5
CRISP1	cysteine-rich secretory protein 1	*
CRISP2	cysteine-rich secretory protein 2	*
CRISP3	cysteine-rich secretory protein 3	*
CRISPLD1	cysteine-rich secretory protein LCCL domain containing 1
CRLF2	cytokine receptor-like factor 2
CRNN	cornulin	*
CROCC	ciliary rootlet coiled-coil, rootletin
CRYBB3	crystallin, beta B3	*
CSAG2	CSAG family, member 2	*
CSAG3	CSAG family, member 3	*
CSMD1	CUB and Sushi multiple domains 1
CSMD3	CUB and Sushi multiple domains 3	*
CSN3	casein kappa
CSNK2A1	casein kinase 2, alpha 1 polypeptide
CST1	cystatin SN	*
CST13P	cystatin 13, pseudogene	*
CST4	cystatin S
CST5	cystatin D
CST8	cystatin 8 (cystatin-related epididymal specific)	*
CT45A1	cancer/testis antigen family 45, member A1	*
CT45A2	cancer/testis antigen family 45, member A2	*
CT45A3	cancer/testis antigen family 45, member A3	*
CT45A4	cancer/testis antigen family 45, member A4	*
CT45A5	cancer/testis antigen family 45, member A5	*
CT62	cancer/testis antigen 62
CTAGE15P	CTAGE family, member 15, pseudogene	*
CTAGE4	CTAGE family, member 4	*
CTAGE6P	CTAGE family, member 6, pseudogene	*
CTPS2	CTP synthase 2
CTRB1	chymotrypsinogen B1
CTRC	chymotrypsin C (caldecrin)
CTSL2	cathepsin L2
CTSL3	cathepsin L family member 3
CTU1	cytosolic thiouridylase subunit 1 homolog (S. pombe)
CTXN3	cortexin 3	*
CWC22	CWC22 spliceosome-associated protein homolog (S. cerevisiae)
CX3CL1	chemokine (C-X3-C motif) ligand 1
CX3CR1	chemokine (C-X3-C motif) receptor 1
CXADRP3	coxsackie virus and adenovirus receptor pseudogene 3
CXCL13	chemokine (C-X-C motif) ligand 13
CXorf1	chromosome X open reading frame 1
CXorf49	chromosome X open reading frame 49
CXorf49B	chromosome X open reading frame 49B
CXorf59	chromosome X open reading frame 59
CXorf64	chromosome X open reading frame 64	*
CXorf65	chromosome X open reading frame 65	*
CYB5A	cytochrome b5 type A (microsomal)
CYBRD1	cytochrome b reductase 1
CYLC1	cylicin, basic protein of sperm head cytoskeleton 1
CYLC2	cylicin, basic protein of sperm head cytoskeleton 2
CYLD	cylindromatosis (turban tumor syndrome)
CYP11B2	cytochrome P450, family 11, subfamily B, polypeptide 2	*
CYP1B1-AS1	CYP1B1 antisense RNA 1
CYP2C19	cytochrome P450, family 2, subfamily C, polypeptide 19	*
CYP2C9	cytochrome P450, family 2, subfamily C, polypeptide 9	*
CYP4A22	cytochrome P450, family 4, subfamily A, polypeptide 22
CYP4F30P	cytochrome P450, family 4, subfamily F, polypeptide 30, pseudogene	*
CYP4F35P	cytochrome P450, family 4, subfamily F, polypeptide 35, pseudogene	*
CYP7B1	cytochrome P450, family 7, subfamily B, polypeptide 1
CYSLTR1	cysteinyl leukotriene receptor 1	*
CYSTM1	cysteine-rich transmembrane module containing 1
DAAM2	dishevelled associated activator of morphogenesis 2
DAB2IP	DAB2 interacting protein
DAPP1	dual adaptor of phosphotyrosine and 3-phosphoinositides	*
DCAF4L1	DDB1 and CUL4 associated factor 4-like 1
DCAF8L2	DDB1 and CUL4 associated factor 8-like 2
DCD	dermcidin	*
DCHS2	dachsous 2 (Drosophila)	*
DCP2	DCP2 decapping enzyme homolog (S. cerevisiae)
DCST1	DC-STAMP domain containing 1
DCTN1	dynactin 1
DDC	dopa decarboxylase (aromatic L-amino acid decarboxylase)	*
DDO	D-aspartate oxidase	*
DDR1	discoidin domain receptor tyrosine kinase 1
DDX26B	DEAD/H (Asp-Glu-Ala-Asp/His) box polypeptide 26B
DDX47	DEAD (Asp-Glu-Ala-Asp) box polypeptide 47
DDX49	DEAD (Asp-Glu-Ala-Asp) box polypeptide 49
DEFB103A	defensin, beta 103A	*
DEFB103B	defensin, beta 103B	*
DEFB104A	defensin, beta 104A	*
DEFB104B	defensin, beta 104B	*
DEFB109P1B	defensin, beta 109, pseudogene 1B	*
DEFB113	defensin, beta 113
DEFB115	defensin, beta 115	*
DEFB122	defensin, beta 122 (pseudogene)
DEFB130	defensin, beta 130	*
DEFB131	defensin, beta 131	*
DEFB135	defensin, beta 135
DEFB136	defensin, beta 136
DENND1A	DENN/MADD domain containing 1A
DENND1C	DENN/MADD domain containing 1C
DEPDC1	DEP domain containing 1
DEPDC1B	DEP domain containing 1B
DESI2	desumoylating isopeptidase 2
DGAT2L6	diacylglycerol O-acyltransferase 2-like 6
DGKE	diacylglycerol kinase, epsilon 64kDa
DHRS4	dehydrogenase/reductase (SDR family) member 4
DHRS4-AS1	DHRS4 antisense RNA 1
DHRS9	dehydrogenase/reductase (SDR family) member 9	*
DHX38	DEAH (Asp-Glu-Ala-His) box polypeptide 38
DIAPH2	diaphanous homolog 2 (Drosophila)
DIRAS2	DIRAS family, GTP-binding RAS-like 2
DIRAS3	DIRAS family, GTP-binding RAS-like 3	*
DIRC2	disrupted in renal carcinoma 2
DISC1	disrupted in schizophrenia 1
DKFZP434L187	uncharacterized LOC26082
DKKL1	dickkopf-like 1
DLG2	discs, large homolog 2 (Drosophila)	*
DLG3	discs, large homolog 3 (Drosophila)
DLGAP1	discs, large (Drosophila) homolog-associated protein 1
DLGAP2	discs, large (Drosophila) homolog-associated protein 2	*
DMBT1	deleted in malignant brain tumors 1	*
DMD	dystrophin	*
DMKN	dermokine
DMRT2	doublesex and mab-3 related transcription factor 2
DNAH5	dynein, axonemal, heavy chain 5	*
DNAI2	dynein, axonemal, intermediate chain 2
DNAJB3	DnaJ (Hsp40) homolog, subfamily B, member 3	*
DNAJC16	DnaJ (Hsp40) homolog, subfamily C, member 16
DNAJC6	DnaJ (Hsp40) homolog, subfamily C, member 6
DNAL4	dynein, axonemal, light chain 4
DND1	dead end homolog 1 (zebrafish)
DNLZ	DNL-type zinc finger
DOK5	docking protein 5
DOPEY2	dopey family member 2
DPH2	DPH2 homolog (S. cerevisiae)
DPP6	dipeptidyl-peptidase 6
DPYS	dihydropyrimidinase
DRD3	dopamine receptor D3
DRD5	dopamine receptor D5
DRP2	dystrophin related protein 2	*
DSG2	desmoglein 2
DTNA	dystrobrevin, alpha	*
DTNB	dystrobrevin, beta
DTWD2	DTW domain containing 2
DUSP10	dual specificity phosphatase 10
DUSP13	dual specificity phosphatase 13
DYNC1I2	dynein, cytoplasmic 1, intermediate chain 2
DYNLRB2	dynein, light chain, roadblock-type 2
DYRK4	dual-specificity tyrosine-(Y)-phosphorylation regulated kinase 4	*
DZANK1	double zinc ribbon and ankyrin repeat domains 1
ECHDC3	enoyl CoA hydratase domain containing 3
ECT2L	epithelial cell transforming sequence 2 oncogene-like
EDARADD	EDAR-associated death domain
EDN3	endothelin 3
EFCAB10	EF-hand calcium binding domain 10
EFCAB3	EF-hand calcium binding domain 3
EFS	embryonal Fyn-associated substrate	*
EGF	epidermal growth factor
EGOT	eosinophil granule ontogeny transcript (non-protein coding)
EHBP1	EH domain binding protein 1
EHD3	EH-domain containing 3
EID2B	EP300 interacting inhibitor of differentiation 2B
EIF2B3	eukaryotic translation initiation factor 2B, subunit 3 gamma, 58kDa
EIF3F	eukaryotic translation initiation factor 3, subunit F
EIF3IP1	eukaryotic translation initiation factor 3, subunit I pseudogene 1	*
EIF4E3	eukaryotic translation initiation factor 4E family member 3
ELAVL4	ELAV (embryonic lethal, abnormal vision, Drosophila)-like 4	*
ELK1	ELK1, member of ETS oncogene family
ELMO1	engulfment and cell motility 1	*
ELMO2	engulfment and cell motility 2
EMP2	epithelial membrane protein 2
EMR3	egf-like module containing, mucin-like, hormone receptor-like 3	*
ENDOV	endonuclease V
ENPP3	ectonucleotide pyrophosphatase/phosphodiesterase 3
ENTHD1	ENTH domain containing 1
EPHA10	EPH receptor A10
EPN2	epsin 2
EPO	erythropoietin
ERICH1	glutamate-rich 1
ESR1	estrogen receptor 1	*
ESRG	embryonic stem cell related (non-protein coding)	*
ESRRG	estrogen-related receptor gamma	*
ESX1	ESX homeobox 1
ETFB	electron-transfer-flavoprotein, beta polypeptide
ETV2	ets variant 2
ETV3L	ets variant 3-like
ETV4	ets variant 4
EXOSC10	exosome component 10
EXPH5	exophilin 5	*
EYS	eyes shut homolog (Drosophila)
FAAH2	fatty acid amide hydrolase 2	*
FABP12	fatty acid binding protein 12
FAIM3	Fas apoptotic inhibitory molecule 3	*
FAM104B	family with sequence similarity 104, member B
FAM106A	family with sequence similarity 106, member A
FAM107A	family with sequence similarity 107, member A
FAM109A	family with sequence similarity 109, member A
FAM111B	family with sequence similarity 111, member B
FAM115C	family with sequence similarity 115, member C
FAM118A	family with sequence similarity 118, member A
FAM132A	family with sequence similarity 132, member A	*
FAM134B	family with sequence similarity 134, member B
FAM135B	family with sequence similarity 135, member B
FAM160B2	family with sequence similarity 160, member B2	*
FAM165B	family with sequence similarity 165, member B
FAM176C	family with sequence similarity 176, member C
FAM178A	family with sequence similarity 178, member A
FAM182A	family with sequence similarity 182, member A	*
FAM182B	family with sequence similarity 182, member B	*
FAM188B	family with sequence similarity 188, member B
FAM193A	family with sequence similarity 193, member A
FAM198A	family with sequence similarity 198, member A
FAM200A	family with sequence similarity 200, member A
FAM209B	family with sequence similarity 209, member B	*
FAM219A	family with sequence similarity 219, member A
FAM222A-AS1	FAM222A antisense RNA 1
FAM226A	family with sequence similarity 226, member A (non-protein coding)
FAM226B	family with sequence similarity 226, member B (non-protein coding)
FAM24A	family with sequence similarity 24, member A
FAM25B	family with sequence similarity 25, member B
FAM25C	family with sequence similarity 25, member C
FAM25G	family with sequence similarity 25, member G
FAM27B	family with sequence similarity 27, member B	*
FAM3D	family with sequence similarity 3, member D
FAM48B1	family with sequence similarity 48, member B1
FAM49A	family with sequence similarity 49, member A
FAM5B	family with sequence similarity 5, member B	*
FAM63B	family with sequence similarity 63, member B
FAM64A	family with sequence similarity 64, member A
FAM65B	family with sequence similarity 65, member B	*
FAM71A	family with sequence similarity 71, member A	*
FAM75C1	family with sequence similarity 75, member C1	*
FAM99A	family with sequence similarity 99, member A (non-protein coding)
FAM99B	family with sequence similarity 99, member B (non-protein coding)
FANCA	Fanconi anemia, complementation group A
FAR2	fatty acyl CoA reductase 2
FARSA	phenylalanyl-tRNA synthetase, alpha subunit
FASTKD2	FAST kinase domains 2
FAT2	FAT tumor suppressor homolog 2 (Drosophila)	*
FBL	fibrillarin
FBXL2	F-box and leucine-rich repeat protein 2
FBXO21	F-box protein 21
FBXO25	F-box protein 25
FBXO41	F-box protein 41
FBXO7	F-box protein 7
FCAMR	Fc receptor, IgA, IgM, high affinity
FCER2	Fc fragment of IgE, low affinity II, receptor for (CD23)	*
FCGBP	Fc fragment of IgG binding protein	*
FCGR3B	Fc fragment of IgG, low affinity IIIb, receptor (CD16b)
FCRL2	Fc receptor-like 2	*
FDPS	farnesyl diphosphate synthase
FDPSL2A	MGC44478
FFAR2	free fatty acid receptor 2
FFAR3	free fatty acid receptor 3	*
FGA	fibrinogen alpha chain	*
FGF12	fibroblast growth factor 12
FGF13	fibroblast growth factor 13	*
FGF21	fibroblast growth factor 21
FGFR2	fibroblast growth factor receptor 2	*
FGFRL1	fibroblast growth factor receptor-like 1
FGGY	FGGY carbohydrate kinase domain containing
FHAD1	forkhead-associated (FHA) phosphopeptide binding domain 1
FHIT	fragile histidine triad
FHL1	four and a half LIM domains 1
FIG4	FIG4 homolog, SAC1 lipid phosphatase domain containing (S. cerevisiae)
FIGF	c-fos induced growth factor (vascular endothelial growth factor D)
FKBP1A	FK506 binding protein 1A, 12kDa
FKBP1AP1	FK506 binding protein 1A, 12kDa pseudogene 1
FKBP4	FK506 binding protein 4, 59kDa
FKBP9L	FK506 binding protein 9-like
FLJ25328	uncharacterized LOC148231
FLJ30679	uncharacterized protein FLJ30679
FLJ33360	FLJ33360 protein	*
FLJ36000	uncharacterized FLJ36000	*
FLJ42627	uncharacterized LOC645644
FLJ45340	uncharacterized LOC402483
FMO4	flavin containing monooxygenase 4
FMO9P	flavin containing monooxygenase 9 pseudogene	*
FNDC4	fibronectin type III domain containing 4
FNDC5	fibronectin type III domain containing 5
FOLH1	folate hydrolase (prostate-specific membrane antigen) 1
FOXD4L1	forkhead box D4-like 1	*
FOXD4L5	forkhead box D4-like 5	*
FOXJ3	forkhead box J3
FOXP3	forkhead box P3	*
FRG2	FSHD region gene 2	*
FRMD1	FERM domain containing 1	*
FRMD4A	FERM domain containing 4A	*
FRMD7	FERM domain containing 7
FRMPD2	FERM and PDZ domain containing 2	*
FRMPD2P1	FERM and PDZ domain containing 2 pseudogene 1	*
FRMPD4	FERM and PDZ domain containing 4
FRMPDP2	FERM and PDZ domain containing 2 pseudogene 2	*
FTL	ferritin, light polypeptide
FTSJ2	FtsJ RNA methyltransferase homolog 2 (E. coli)
FTSJD1	FtsJ methyltransferase domain containing 1
FUT3	fucosyltransferase 3 (galactoside 3(4)-L-fucosyltransferase, Lewis blood group)	*
FXN	frataxin
FXYD2	FXYD domain containing ion transport regulator 2	*
FXYD6	FXYD domain containing ion transport regulator 6	*
FXYD7	FXYD domain containing ion transport regulator 7
G6PC2	glucose-6-phosphatase, catalytic, 2
GABRA1	gamma-aminobutyric acid (GABA) A receptor, alpha 1	*
GABRE	gamma-aminobutyric acid (GABA) A receptor, epsilon
GABRR1	gamma-aminobutyric acid (GABA) A receptor, rho 1	*
GAL3ST2	galactose-3-O-sulfotransferase 2
GALNS	galactosamine (N-acetyl)-6-sulfate sulfatase
GALNT10	UDP-N-acetyl-alpha-D-galactosamine:polypeptide N-acetylgalactosaminyltransferase 10 (GalNAc-T10)
GAP43	growth associated protein 43
GAS2L2	growth arrest-specific 2 like 2
GAS6	growth arrest-specific 6	*
GAS7	growth arrest-specific 7	*
GBA2	glucosidase, beta (bile acid) 2
GBP6	guanylate binding protein family, member 6
GCG	glucagon
GCK	glucokinase (hexokinase 4)
GCM1	glial cells missing homolog 1 (Drosophila)
GCNT1	glucosaminyl (N-acetyl) transferase 1, core 2	*
GCNT2	glucosaminyl (N-acetyl) transferase 2, I-branching enzyme (I blood group)	*
GCSAM	germinal center-associated, signaling and motility	*
GCSAML-AS1	GCSAML antisense RNA 1
GCSH	glycine cleavage system protein H (aminomethyl carrier)
GDAP1	ganglioside induced differentiation associated protein 1
GDPD2	glycerophosphodiester phosphodiesterase domain containing 2	*
GFM1	G elongation factor, mitochondrial 1
GGCT	gamma-glutamylcyclotransferase
GGT6	gamma-glutamyltransferase 6
GGTLC1	gamma-glutamyltransferase light chain 1	*
GIMAP1	GTPase, IMAP family member 1	*
GJA10	gap junction protein, alpha 10, 62kDa	*
GJB3	gap junction protein, beta 3, 31kDa
GJB4	gap junction protein, beta 4, 30.3kDa
GJB5	gap junction protein, beta 5, 31.1kDa
GKAP1	G kinase anchoring protein 1
GLIS3	GLIS family zinc finger 3
GLP2R	glucagon-like peptide 2 receptor	*
GLRA1	glycine receptor, alpha 1
GLRA2	glycine receptor, alpha 2
GLRX2	glutaredoxin 2
GLYATL2	glycine-N-acyltransferase-like 2
GNLY	granulysin
GNRH2	gonadotropin-releasing hormone 2
GOLGA8A	golgin A8 family, member A
GOLGA8B	golgin A8 family, member B
GPA33	glycoprotein A33 (transmembrane)	*
GPAT2	glycerol-3-phosphate acyltransferase 2, mitochondrial
GPC3	glypican 3
GPHB5	glycoprotein hormone beta 5	*
GPM6B	glycoprotein M6B	*
GPR139	G protein-coupled receptor 139
GPR152	G protein-coupled receptor 152
GPR160	G protein-coupled receptor 160
GPR162	G protein-coupled receptor 162	*
GPR3	G protein-coupled receptor 3
GPR56	G protein-coupled receptor 56
GPR63	G protein-coupled receptor 63
GPR65	G protein-coupled receptor 65
GPR88	G protein-coupled receptor 88
GPR89A	G protein-coupled receptor 89A
GPR89B	G protein-coupled receptor 89B
GPRIN1	G protein regulated inducer of neurite outgrowth 1
GPT2	glutamic pyruvate transaminase (alanine aminotransferase) 2
GPX1	glutathione peroxidase 1
GRAP2	GRB2-related adaptor protein 2
GRHL3	grainyhead-like 3 (Drosophila)
GRIA1	glutamate receptor, ionotropic, AMPA 1	*
GRIK1	glutamate receptor, ionotropic, kainate 1
GRIK1-AS1	GRIK1 antisense RNA 1	*
GRIK4	glutamate receptor, ionotropic, kainate 4
GRIN3A	glutamate receptor, ionotropic, N-methyl-D-aspartate 3A
GRIP1	glutamate receptor interacting protein 1
GRM3	glutamate receptor, metabotropic 3
GRM5	glutamate receptor, metabotropic 5	*
GRM6	glutamate receptor, metabotropic 6
GRPR	gastrin-releasing peptide receptor
GRSF1	G-rich RNA sequence binding factor 1
GSC	goosecoid homeobox
GSDMD	gasdermin D
GSR	glutathione reductase
GSTA1	glutathione S-transferase alpha 1
GSTA2	glutathione S-transferase alpha 2
GSTA5	glutathione S-transferase alpha 5
GTF2H2B	general transcription factor IIH, polypeptide 2B (pseudogene)	*
GTF2H2D	general transcription factor IIH, polypeptide 2D	*
GTF3A	general transcription factor IIIA
GTPBP8	GTP-binding protein 8 (putative)
GTSF1L	gametocyte specific factor 1-like	*
GUCY2C	guanylate cyclase 2C (heat stable enterotoxin receptor)
GYPA	glycophorin A (MNS blood group)
GZMH	granzyme H (cathepsin G-like 2, protein h-CCPX)	*
GZMK	granzyme K (granzyme 3; tryptase II)
H2AFY	H2A histone family, member Y	*
H2BFXP	H2B histone family, member X, pseudogene	*
HAGHL	hydroxyacylglutathione hydrolase-like
HAO1	hydroxyacid oxidase (glycolate oxidase) 1
HAR1A	highly accelerated region 1A (non-protein coding)
HAVCR1	hepatitis A virus cellular receptor 1
HAVCR2	hepatitis A virus cellular receptor 2	*
HBD	hemoglobin, delta	*
HBG1	hemoglobin, gamma A
HCG9	HLA complex group 9 (non-protein coding)	*
HDAC8	histone deacetylase 8
HDHD3	haloacid dehalogenase-like hydrolase domain containing 3
HEATR7A	HEAT repeat containing 7A
HEATR8	HEAT repeat containing 8
HECA	headcase homolog (Drosophila)
HEPACAM	hepatic and glial cell adhesion molecule	*
HEPH	hephaestin
HEPN1	hepatocellular carcinoma, down-regulated 1
HESX1	HESX homeobox 1	*
HGF	hepatocyte growth factor (hepapoietin A; scatter factor)
HHLA2	HERV-H LTR-associating 2
HIST1H2AA	histone cluster 1, H2aa	*
HK1	hexokinase 1
HLA-DPB1	major histocompatibility complex, class II, DP beta 1
HLA-DPB2	major histocompatibility complex, class II, DP beta 2 (pseudogene)
HLA-DQB1	major histocompatibility complex, class II, DQ beta 1
HLA-DQB2	major histocompatibility complex, class II, DQ beta 2	*
HLA-F-AS1	HLA-F antisense RNA 1	*
HLA-J	major histocompatibility complex, class I, J (pseudogene)
HLF	hepatic leukemia factor
HMBS	hydroxymethylbilane synthase
HMGB3	high mobility group box 3
HMGCR	3-hydroxy-3-methylglutaryl-CoA reductase
HMGCS1	3-hydroxy-3-methylglutaryl-CoA synthase 1 (soluble)
HMGN5	high mobility group nucleosome binding domain 5	*
HRASLS2	HRAS-like suppressor 2
HRK	harakiri, BCL2 interacting protein (contains only BH3 domain)
HS1BP3	HCLS1 binding protein 3
HS3ST4	heparan sulfate (glucosamine) 3-O-sulfotransferase 4
HS3ST5	heparan sulfate (glucosamine) 3-O-sulfotransferase 5
HS6ST2	heparan sulfate 6-O-sulfotransferase 2	*
HSD17B3	hydroxysteroid (17-beta) dehydrogenase 3
HSD17B4	hydroxysteroid (17-beta) dehydrogenase 4
HSP90AB2P	heat shock protein 90kDa alpha (cytosolic), class B member 2, pseudogene
HSPA6	heat shock 70kDa protein 6 (HSP70B')
HTN1	histatin 1	*
HTN3	histatin 3
HTR2A	5-hydroxytryptamine (serotonin) receptor 2A, G protein-coupled
HTR3B	5-hydroxytryptamine (serotonin) receptor 3B, ionotropic
HTR4	5-hydroxytryptamine (serotonin) receptor 4, G protein-coupled
HTR5A	5-hydroxytryptamine (serotonin) receptor 5A, G protein-coupled
HULC	highly up-regulated in liver cancer (non-protein coding)	*
ICAM1	intercellular adhesion molecule 1
ICOS	inducible T-cell co-stimulator
IDH1	isocitrate dehydrogenase 1 (NADP+), soluble
IDS	iduronate 2-sulfatase
IER3IP1	immediate early response 3 interacting protein 1
IFIT5	interferon-induced protein with tetratricopeptide repeats 5
IFNA10	interferon, alpha 10
IFNA13	interferon, alpha 13
IFNK	interferon, kappa
IGFALS	insulin-like growth factor binding protein, acid labile subunit	*
IGSF1	immunoglobulin superfamily, member 1	*
IGSF3	immunoglobulin superfamily, member 3
IGSF5	immunoglobulin superfamily, member 5	*
IL10RA	interleukin 10 receptor, alpha
IL17F	interleukin 17F	*
IL1B	interleukin 1, beta
IL1F10	interleukin 1 family, member 10 (theta)	*
IL1RAPL1	interleukin 1 receptor accessory protein-like 1
IL1RAPL2	interleukin 1 receptor accessory protein-like 2
IL1RN	interleukin 1 receptor antagonist
IL20	interleukin 20
IL22RA2	interleukin 22 receptor, alpha 2
IL23R	interleukin 23 receptor
IL29	interleukin 29 (interferon, lambda 1)	*
IL36G	interleukin 36, gamma	*
IL36RN	interleukin 36 receptor antagonist	*
IL37	interleukin 37	*
IL9R	interleukin 9 receptor
IMPDH2	IMP (inosine 5'-monophosphate) dehydrogenase 2
INPP5F	inositol polyphosphate-5-phosphatase F
INSC	inscuteable homolog (Drosophila)
INSL5	insulin-like 5
IPCEF1	interaction protein for cytohesin exchange factors 1
IQCF1	IQ motif containing F1	*
IQCJ	IQ motif containing J
IQCK	IQ motif containing K
IQGAP2	IQ motif containing GTPase activating protein 2
ISM1	isthmin 1 homolog (zebrafish)	*
ISX	intestine-specific homeobox	*
ITGA10	integrin, alpha 10
ITGAD	integrin, alpha D	*
ITGAX	integrin, alpha X (complement component 3 receptor 4 subunit)
ITGB1BP2	integrin beta 1 binding protein (melusin) 2	*
ITIH1	inter-alpha-trypsin inhibitor heavy chain 1
ITM2A	integral membrane protein 2A
IZUMO2	IZUMO family member 2
JPH4	junctophilin 4
KALRN	kalirin, RhoGEF kinase	*
KAZN	kazrin, periplakin interacting protein
KBTBD5	kelch repeat and BTB (POZ) domain containing 5
KC6	keratoconus gene 6
KCNA10	potassium voltage-gated channel, shaker-related subfamily, member 10	*
KCNAB1	potassium voltage-gated channel, shaker-related subfamily, beta member 1	*
KCNB2	potassium voltage-gated channel, Shab-related subfamily, member 2
KCNE1	potassium voltage-gated channel, Isk-related family, member 1
KCNG4	potassium voltage-gated channel, subfamily G, member 4
KCNIP4	Kv channel interacting protein 4	*
KCNK1	potassium channel, subfamily K, member 1
KCNK16	potassium channel, subfamily K, member 16	*
KCNK17	potassium channel, subfamily K, member 17
KCNMB1	potassium large conductance calcium-activated channel, subfamily M, beta member 1	*
KCNMB2	potassium large conductance calcium-activated channel, subfamily M, beta member 2	*
KCNN4	potassium intermediate/small conductance calcium-activated channel, subfamily N, member 4	*
KCNQ3	potassium voltage-gated channel, KQT-like subfamily, member 3
KCNS3	potassium voltage-gated channel, delayed-rectifier, subfamily S, member 3
KCNU1	potassium channel, subfamily U, member 1
KDELR1	KDEL (Lys-Asp-Glu-Leu) endoplasmic reticulum protein retention receptor 1	*
KIAA1024	KIAA1024
KIAA1217	KIAA1217
KIAA1551	KIAA1551
KIAA1671	KIAA1671	*
KIAA1755	KIAA1755
KIF18B	kinesin family member 18B
KIF25	kinesin family member 25
KIF4A	kinesin family member 4A
KIF4B	kinesin family member 4B	*
KIR2DL1	killer cell immunoglobulin-like receptor, two domains, long cytoplasmic tail, 1	*
KIR2DL2	killer cell immunoglobulin-like receptor, two domains, long cytoplasmic tail, 2	*
KIR2DL3	killer cell immunoglobulin-like receptor, two domains, long cytoplasmic tail, 3	*
KIR2DL4	killer cell immunoglobulin-like receptor, two domains, long cytoplasmic tail, 4	*
KIR2DL5A	killer cell immunoglobulin-like receptor, two domains, long cytoplasmic tail, 5A
KIR2DL5B	killer cell immunoglobulin-like receptor, two domains, long cytoplasmic tail, 5B
KIR2DS2	killer cell immunoglobulin-like receptor, two domains, short cytoplasmic tail, 2
KIR2DS3	killer cell immunoglobulin-like receptor, two domains, short cytoplasmic tail, 3
KIR2DS5	killer cell immunoglobulin-like receptor, two domains, short cytoplasmic tail, 5
KIR3DL1	killer cell immunoglobulin-like receptor, three domains, long cytoplasmic tail, 1	*
KIR3DL2	killer cell immunoglobulin-like receptor, three domains, long cytoplasmic tail, 2	*
KIR3DS1	killer cell immunoglobulin-like receptor, three domains, short cytoplasmic tail, 1
KLF8	Kruppel-like factor 8	*
KLK1	kallikrein 1
KLK10	kallikrein-related peptidase 10
KLK11	kallikrein-related peptidase 11	*
KLK12	kallikrein-related peptidase 12	*
KLK13	kallikrein-related peptidase 13
KLK14	kallikrein-related peptidase 14	*
KLK3	kallikrein-related peptidase 3	*
KLK4	kallikrein-related peptidase 4	*
KLK6	kallikrein-related peptidase 6	*
KLK7	kallikrein-related peptidase 7	*
KLK9	kallikrein-related peptidase 9	*
KLKB1	kallikrein B, plasma (Fletcher factor) 1
KLRD1	killer cell lectin-like receptor subfamily D, member 1	*
KNG1	kininogen 1	*
KPNA5	karyopherin alpha 5 (importin alpha 6)
KPNA7	karyopherin alpha 7 (importin alpha 8)
KRT17	keratin 17	*
KRT31	keratin 31
KRT40	keratin 40
KRT74	keratin 74
KRT8	keratin 8
KRT84	keratin 84	*
KRTAP10-11	keratin associated protein 10-11	*
KRTAP10-2	keratin associated protein 10-2
KRTAP10-6	keratin associated protein 10-6	*
KRTAP12-4	keratin associated protein 12-4	*
KRTAP13-2	keratin associated protein 13-2	*
KRTAP20-1	keratin associated protein 20-1
KRTAP22-1	keratin associated protein 22-1
KRTAP24-1	keratin associated protein 24-1	*
KRTAP3-2	keratin associated protein 3-2
KRTAP5-11	keratin associated protein 5-11	*
KRTAP5-4	keratin associated protein 5-4	*
KRTAP5-5	keratin associated protein 5-5	*
KRTAP5-7	keratin associated protein 5-7	*
KRTAP5-8	keratin associated protein 5-8	*
KY	kyphoscoliosis peptidase
KYNU	kynureninase	*
LAMB3	laminin, beta 3
LANCL3	LanC lantibiotic synthetase component C-like 3 (bacterial)
LAPTM4B	lysosomal protein transmembrane 4 beta
LAT	linker for activation of T cells
LBP	lipopolysaccharide binding protein
LCE2A	late cornified envelope 2A	*
LCE2B	late cornified envelope 2B	*
LCE2C	late cornified envelope 2C	*
LCE2D	late cornified envelope 2D	*
LCE3C	late cornified envelope 3C	*
LCN1	lipocalin 1	*
LCN15	lipocalin 15
LCN9	lipocalin 9
LCORL	ligand dependent nuclear receptor corepressor-like
LCP2	lymphocyte cytosolic protein 2 (SH2 domain containing leukocyte protein of 76kDa)	*
LEP	leptin
LGALS12	lectin, galactoside-binding, soluble, 12
LGALS17A	Charcot-Leyden crystal protein pseudogene	*
LGALS8	lectin, galactoside-binding, soluble, 8	*
LGMN	legumain
LHFPL3	lipoma HMGIC fusion partner-like 3
LHPP	phospholysine phosphohistidine inorganic pyrophosphate phosphatase
LIFR	leukemia inhibitory factor receptor alpha	*
LILRA2	leukocyte immunoglobulin-like receptor, subfamily A (with TM domain), member 2	*
LILRA4	leukocyte immunoglobulin-like receptor, subfamily A (with TM domain), member 4	*
LILRA6	leukocyte immunoglobulin-like receptor, subfamily A (with TM domain), member 6
LILRB3	leukocyte immunoglobulin-like receptor, subfamily B (with TM and ITIM domains), member 3	*
LILRB4	leukocyte immunoglobulin-like receptor, subfamily B (with TM and ITIM domains), member 4	*
LILRB5	leukocyte immunoglobulin-like receptor, subfamily B (with TM and ITIM domains), member 5	*
LILRP2	leukocyte immunoglobulin-like receptor pseudogene 2	*
LIM2	lens intrinsic membrane protein 2, 19kDa	*
LINC00114	long intergenic non-protein coding RNA 114	*
LINC00115	long intergenic non-protein coding RNA 115
LINC00200	long intergenic non-protein coding RNA 200
LINC00202	long intergenic non-protein coding RNA 202	*
LINC00207	long intergenic non-protein coding RNA 207
LINC00238	long intergenic non-protein coding RNA 238	*
LINC00239	long intergenic non-protein coding RNA 239	*
LINC00242	long intergenic non-protein coding RNA 242
LINC00244	long intergenic non-protein coding RNA 244
LINC00265	long intergenic non-protein coding RNA 265
LINC00301	long intergenic non-protein coding RNA 301
LINC00305	long intergenic non-protein coding RNA 305	*
LINC00314	long intergenic non-protein coding RNA 314
LINC00336	long intergenic non-protein coding RNA 336
LINC00494	long intergenic non-protein coding RNA 494
LINC00521	long intergenic non-protein coding RNA 521
LINC00574	long intergenic non-protein coding RNA 574
LINC00589	long intergenic non-protein coding RNA 589
LINC00606	long intergenic non-protein coding RNA 606
LINC00634	long intergenic non-protein coding RNA 634
LINGO4	leucine rich repeat and Ig domain containing 4
LMBR1L	limb region 1 homolog (mouse)-like
LMBRD1	LMBR1 domain containing 1
LMBRD2	LMBR1 domain containing 2
LMO3	LIM domain only 3 (rhombotin-like 2)
LOC100128239	uncharacterized LOC100128239
LOC100129055	cyclin Y-like pseudogene	*
LOC100129550	uncharacterized LOC100129550	*
LOC100130776	uncharacterized LOC100130776
LOC100131434	uncharacterized LOC100131434
LOC100190940	uncharacterized LOC100190940
LOC100192426	uncharacterized LOC100192426
LOC100240735	uncharacterized LOC100240735
LOC100272228	uncharacterized LOC100272228
LOC144742	uncharacterized LOC144742	*
LOC145837	uncharacterized LOC145837	*
LOC154449	uncharacterized LOC154449	*
LOC154761	family with sequence similarity 115, member C pseudogene
LOC200726	hCG1657980
LOC202181	chromosome 5 open reading frame 25 pseudogene
LOC220729	succinate dehydrogenase complex, subunit A, flavoprotein (Fp) pseudogene
LOC221122	uncharacterized LOC221122	*
LOC255025	uncharacterized LOC255025
LOC283174	uncharacterized LOC283174	*
LOC284100	tyrosine 3-monooxygenase/tryptophan 5-monooxygenase activation protein, epsilon polypeptide pseudogene
LOC284379	solute carrier family 7 (cationic amino acid transporter, y+ system), member 3 pseudogene	*
LOC285548	uncharacterized LOC285548
LOC285629	uncharacterized LOC285629	*
LOC339240	keratin 17 pseudogene	*
LOC340017	uncharacterized LOC340017
LOC340508	growth arrest-specific 2 like 1 pseudogene
LOC389458	uncharacterized LOC389458
LOC391322	D-dopachrome tautomerase-like
LOC392145	exosome component 6 pseudogene
LOC400752	uncharacterized LOC400752
LOC400794	uncharacterized LOC400794	*
LOC400891	chromosome 14 open reading frame 166B pseudogene
LOC400940	uncharacterized LOC400940	*
LOC407835	mitogen-activated protein kinase kinase 2 pseudogene
LOC440895	two pore channel 3 pseudogene
LOC441455	makorin ring finger protein 1 pseudogene	*
LOC644936	actin, beta pseudogene
LOC645166	lymphocyte-specific protein 1 pseudogene	*
LOC647859	occludin pseudogene	*
LOC648691	uncharacterized LOC648691
LOC650293	seven transmembrane helix receptor	*
LOC727677	uncharacterized LOC727677	*
LOC728024	chromosome X open reading frame 56 pseudogene	*
LOC728323	uncharacterized LOC728323
LOC728989	phosphodiesterase 4D interacting protein pseudogene	*
LOC730811	uncharacterized LOC730811	*
LOC731789	uncharacterized LOC731789	*
LOC90246	uncharacterized LOC90246
LOR	loricrin
LOXHD1	lipoxygenase homology domains 1	*
LPAR4	lysophosphatidic acid receptor 4
LPO	lactoperoxidase
LRIT1	leucine-rich repeat, immunoglobulin-like and transmembrane domains 1	*
LRIT2	leucine-rich repeat, immunoglobulin-like and transmembrane domains 2
LRP5	low density lipoprotein receptor-related protein 5
LRPAP1	low density lipoprotein receptor-related protein associated protein 1
LRRC30	leucine rich repeat containing 30
LRRC34	leucine rich repeat containing 34
LRRC52	leucine rich repeat containing 52	*
LRRC55	leucine rich repeat containing 55	*
LRRC59	leucine rich repeat containing 59
LRRTM4	leucine rich repeat transmembrane neuronal 4
LSAMP-AS3	LSAMP antisense RNA 3
LY6G6D	lymphocyte antigen 6 complex, locus G6D
LY75	lymphocyte antigen 75
LY9	lymphocyte antigen 9	*
LYG2	lysozyme G-like 2
LYN	v-yes-1 Yamaguchi sarcoma viral related oncogene homolog
LYPD4	LY6/PLAUR domain containing 4	*
LYPD8	LY6/PLAUR domain containing 8	*
LZTS1	leucine zipper, putative tumor suppressor 1
MACC1	metastasis associated in colon cancer 1
MAEL	maelstrom homolog (Drosophila)
MAGEA1	melanoma antigen family A, 1 (directs expression of antigen MZ2-E)
MAGEA2B	melanoma antigen family A, 2B	*
MAGEB1	melanoma antigen family B, 1	*
MAGEB2	melanoma antigen family B, 2
MAGEC1	melanoma antigen family C, 1
MAGED2	melanoma antigen family D, 2
MAP2	microtubule-associated protein 2
MAP7	microtubule-associated protein 7
MAP9	microtubule-associated protein 9
MAPK15	mitogen-activated protein kinase 15
MAPK8	mitogen-activated protein kinase 8
MARC2	mitochondrial amidoxime reducing component 2
MARCO	macrophage receptor with collagenous structure	*
MARVELD3	MARVEL domain containing 3	*
MAS1	MAS1 oncogene	*
MAX	MYC associated factor X
MBD5	methyl-CpG binding domain protein 5
MBL2	mannose-binding lectin (protein C) 2, soluble	*
MBOAT4	membrane bound O-acyltransferase domain containing 4
MC5R	melanocortin 5 receptor
MCEE	methylmalonyl CoA epimerase
MCTP2	multiple C2 domains, transmembrane 2	*
MED27	mediator complex subunit 27
MED28	mediator complex subunit 28
MEIS3	Meis homeobox 3
MEN1	multiple endocrine neoplasia I
MEP1A	meprin A, alpha (PABA peptide hydrolase)
METTL20	methyltransferase like 20	*
METTL21C	methyltransferase like 21C
METTL7B	methyltransferase like 7B
MFSD9	major facilitator superfamily domain containing 9
MGC70870	C-terminal binding protein 2 pseudogene	*
MGMT	O-6-methylguanine-DNA methyltransferase
MIDN	midnolin
MIOS	missing oocyte, meiosis regulator, homolog (Drosophila)
MIR205HG	MIR205 host gene (non-protein coding)
MIR7-3HG	MIR7-3 host gene (non-protein coding)
MKL2	MKL/myocardin-like 2
MLF1IP	MLF1 interacting protein
MLIP	muscular LMNA-interacting protein
MMP23A	matrix metallopeptidase 23A (pseudogene)
MMP23B	matrix metallopeptidase 23B
MNDA	myeloid cell nuclear differentiation antigen	*
MOCS1	molybdenum cofactor synthesis 1
MORC1	MORC family CW-type zinc finger 1
MORC3	MORC family CW-type zinc finger 3
MORF4	mortality factor 4	*
MPO	myeloperoxidase
MPZL1	myelin protein zero-like 1
MRAP2	melanocortin 2 receptor accessory protein 2
MRAS	muscle RAS oncogene homolog
MRC1	mannose receptor, C type 1
MRO	maestro
MRPL10	mitochondrial ribosomal protein L10
MRPL27	mitochondrial ribosomal protein L27
MRPL42P5	mitochondrial ribosomal protein L42 pseudogene 5
MRPS2	mitochondrial ribosomal protein S2
MRS2	MRS2 magnesium homeostasis factor homolog (S. cerevisiae)
MS4A13	membrane-spanning 4-domains, subfamily A, member 13
MS4A14	membrane-spanning 4-domains, subfamily A, member 14	*
MS4A15	membrane-spanning 4-domains, subfamily A, member 15	*
MS4A2	membrane-spanning 4-domains, subfamily A, member 2
MS4A4A	membrane-spanning 4-domains, subfamily A, member 4A	*
MS4A5	membrane-spanning 4-domains, subfamily A, member 5	*
MSL2	male-specific lethal 2 homolog (Drosophila)	*
MTNR1B	melatonin receptor 1B
MUC20	mucin 20, cell surface associated	*
MUC4	mucin 4, cell surface associated
MUC7	mucin 7, secreted
MUM1L1	melanoma associated antigen (mutated) 1-like 1
MUTYH	mutY homolog (E. coli)
MVK	mevalonate kinase
MX1	myxovirus (influenza virus) resistance 1, interferon-inducible protein p78 (mouse)
MXI1	MAX interactor 1
MXRA5	matrix-remodelling associated 5
MYCN	v-myc myelocytomatosis viral related oncogene, neuroblastoma derived (avian)
MYH6	myosin, heavy chain 6, cardiac muscle, alpha	*
MYH7	myosin, heavy chain 7, cardiac muscle, beta
MYH7B	myosin, heavy chain 7B, cardiac muscle, beta
MYLK2	myosin light chain kinase 2
MYO16	myosin XVI
MYO18B	myosin XVIIIB	*
MYO7A	myosin VIIA
MYOCD	myocardin
MYOD1	myogenic differentiation 1
MYOG	myogenin (myogenic factor 4)
NAA11	N(alpha)-acetyltransferase 11, NatA catalytic subunit	*
NAA60	N(alpha)-acetyltransferase 60, NatF catalytic subunit	*
NAALADL1	N-acetylated alpha-linked acidic dipeptidase-like 1
NAGPA	N-acetylglucosamine-1-phosphodiester alpha-N-acetylglucosaminidase
NANOG	Nanog homeobox	*
NANOS2	nanos homolog 2 (Drosophila)
NAP1L6	nucleosome assembly protein 1-like 6	*
NAPB	N-ethylmaleimide-sensitive factor attachment protein, beta
NAPRT1	nicotinate phosphoribosyltransferase domain containing 1
NAPSB	napsin B aspartic peptidase, pseudogene
NBPF16	neuroblastoma breakpoint family, member 16
NBPF22P	neuroblastoma breakpoint family, member 22, pseudogene	*
NBPF4	neuroblastoma breakpoint family, member 4	*
NBPF6	neuroblastoma breakpoint family, member 6	*
NBPF7	neuroblastoma breakpoint family, member 7	*
NCAM1	neural cell adhesion molecule 1
NCBP2	nuclear cap binding protein subunit 2, 20kDa
NCCRP1	non-specific cytotoxic cell receptor protein 1 homolog (zebrafish)
NCF2	neutrophil cytosolic factor 2	*
NCF4	neutrophil cytosolic factor 4, 40kDa
NCK2	NCK adaptor protein 2
NCLN	nicalin	*
NCOA4	nuclear receptor coactivator 4
NDP	Norrie disease (pseudoglioma)
NDUFA10	NADH dehydrogenase (ubiquinone) 1 alpha subcomplex, 10, 42kDa
NEB	nebulin
NEBL	nebulette	*
NEDD4L	neural precursor cell expressed, developmentally down-regulated 4-like, E3 ubiquitin protein ligase
NEDD9	neural precursor cell expressed, developmentally down-regulated 9
NEFL	neurofilament, light polypeptide
NEK2	NIMA (never in mitosis gene a)-related kinase 2
NELL1	NEL-like 1 (chicken)
NENF	neudesin neurotrophic factor
NEUROD2	neuronal differentiation 2
NEUROD4	neuronal differentiation 4
NFASC	neurofascin
NFKBIL1	nuclear factor of kappa light polypeptide gene enhancer in B-cells inhibitor-like 1	*
NFU1	NFU1 iron-sulfur cluster scaffold homolog (S. cerevisiae)
NHLH1	nescient helix loop helix 1	*
NHLH2	nescient helix loop helix 2
NKAIN4	Na+/K+ transporting ATPase interacting 4
NLGN4X	neuroligin 4, X-linked	*
NOB1	NIN1/RPN12 binding protein 1 homolog (S. cerevisiae)
NOD1	nucleotide-binding oligomerization domain containing 1
NOS1	nitric oxide synthase 1 (neuronal)
NOS2	nitric oxide synthase 2, inducible
NOSTRIN	nitric oxide synthase trafficker
NOXRED1	NADP-dependent oxidoreductase domain containing 1
NPHS2	nephrosis 2, idiopathic, steroid-resistant (podocin)
NPPA	natriuretic peptide A
NPY	neuropeptide Y
NR1I3	nuclear receptor subfamily 1, group I, member 3
NR3C1	nuclear receptor subfamily 3, group C, member 1 (glucocorticoid receptor)
NRBF2	nuclear receptor binding factor 2
NRG1	neuregulin 1
NRK	Nik related kinase
NRL	neural retina leucine zipper	*
NRXN3	neurexin 3	*
NSMCE2	non-SMC element 2, MMS21 homolog (S. cerevisiae)
NSMCE4A	non-SMC element 4 homolog A (S. cerevisiae)
NSUN5P1	NOP2/Sun domain family, member 5 pseudogene 1
NSUN5P2	NOP2/Sun domain family, member 5 pseudogene 2
NT5C1A	5'-nucleotidase, cytosolic IA
NTF3	neurotrophin 3
NTM	neurotrimin	*
NUB1	negative regulator of ubiquitin-like proteins 1
NUDT9	nudix (nucleoside diphosphate linked moiety X)-type motif 9
NUGGC	nuclear GTPase, germinal center associated
NUP205	nucleoporin 205kDa
NUP210L	nucleoporin 210kDa-like
NUP214	nucleoporin 214kDa
NXF2	nuclear RNA export factor 2	*
NXF2B	nuclear RNA export factor 2B	*
NXF4	nuclear RNA export factor 4 pseudogene
NXF5	nuclear RNA export factor 5
NYAP2	neuronal tyrosine-phosphorylated phosphoinositide-3-kinase adaptor 2	*
NYX	nyctalopin
OAS2	2'-5'-oligoadenylate synthetase 2, 69/71kDa
OBFC1	oligonucleotide/oligosaccharide-binding fold containing 1
OBP2A	odorant binding protein 2A
ODF3	outer dense fiber of sperm tails 3
ODF3B	outer dense fiber of sperm tails 3B
OFCC1	orofacial cleft 1 candidate 1
OGFR	opioid growth factor receptor
OGFRL1	opioid growth factor receptor-like 1
OLFM1	olfactomedin 1
OLFM4	olfactomedin 4	*
OLFML1	olfactomedin-like 1
OLFML2B	olfactomedin-like 2B
OLR1	oxidized low density lipoprotein (lectin-like) receptor 1
OMA1	OMA1 zinc metallopeptidase homolog (S. cerevisiae)
OPCML	opioid binding protein/cell adhesion molecule-like	*
OPRM1	opioid receptor, mu 1	*
OR10A4	olfactory receptor, family 10, subfamily A, member 4	*
OR10A6	olfactory receptor, family 10, subfamily A, member 6	*
OR10AG1	olfactory receptor, family 10, subfamily AG, member 1
OR10H3	olfactory receptor, family 10, subfamily H, member 3	*
OR10J1	olfactory receptor, family 10, subfamily J, member 1	*
OR11A1	olfactory receptor, family 11, subfamily A, member 1	*
OR11H1	olfactory receptor, family 11, subfamily H, member 1	*
OR13C4	olfactory receptor, family 13, subfamily C, member 4	*
OR13D1	olfactory receptor, family 13, subfamily D, member 1	*
OR1A1	olfactory receptor, family 1, subfamily A, member 1	*
OR1D4	olfactory receptor, family 1, subfamily D, member 4 (gene/pseudogene)	*
OR1D5	olfactory receptor, family 1, subfamily D, member 5	*
OR1E2	olfactory receptor, family 1, subfamily E, member 2	*
OR1J4	olfactory receptor, family 1, subfamily J, member 4	*
OR1K1	olfactory receptor, family 1, subfamily K, member 1	*
OR1L1	olfactory receptor, family 1, subfamily L, member 1	*
OR1L3	olfactory receptor, family 1, subfamily L, member 3	*
OR1N1	olfactory receptor, family 1, subfamily N, member 1	*
OR2AK2	olfactory receptor, family 2, subfamily AK, member 2	*
OR2G2	olfactory receptor, family 2, subfamily G, member 2	*
OR2J3	olfactory receptor, family 2, subfamily J, member 3	*
OR2L13	olfactory receptor, family 2, subfamily L, member 13	*
OR2M3	olfactory receptor, family 2, subfamily M, member 3	*
OR2M7	olfactory receptor, family 2, subfamily M, member 7	*
OR2T10	olfactory receptor, family 2, subfamily T, member 10	*
OR2T11	olfactory receptor, family 2, subfamily T, member 11	*
OR2T2	olfactory receptor, family 2, subfamily T, member 2	*
OR2T27	olfactory receptor, family 2, subfamily T, member 27	*
OR2T35	olfactory receptor, family 2, subfamily T, member 35	*
OR2T4	olfactory receptor, family 2, subfamily T, member 4	*
OR2T6	olfactory receptor, family 2, subfamily T, member 6	*
OR2Y1	olfactory receptor, family 2, subfamily Y, member 1	*
OR2Z1	olfactory receptor, family 2, subfamily Z, member 1	*
OR3A2	olfactory receptor, family 3, subfamily A, member 2	*
OR3A3	olfactory receptor, family 3, subfamily A, member 3	*
OR4A47	olfactory receptor, family 4, subfamily A, member 47	*
OR4B1	olfactory receptor, family 4, subfamily B, member 1	*
OR4C12	olfactory receptor, family 4, subfamily C, member 12	*
OR4C45	olfactory receptor, family 4, subfamily C, member 45	*
OR4C6	olfactory receptor, family 4, subfamily C, member 6	*
OR4D1	olfactory receptor, family 4, subfamily D, member 1	*
OR4D10	olfactory receptor, family 4, subfamily D, member 10	*
OR4D11	olfactory receptor, family 4, subfamily D, member 11	*
OR4D2	olfactory receptor, family 4, subfamily D, member 2	*
OR4F15	olfactory receptor, family 4, subfamily F, member 15	*
OR4K2	olfactory receptor, family 4, subfamily K, member 2	*
OR4K5	olfactory receptor, family 4, subfamily K, member 5	*
OR4N4	olfactory receptor, family 4, subfamily N, member 4	*
OR51A2	olfactory receptor, family 51, subfamily A, member 2	*
OR51B6	olfactory receptor, family 51, subfamily B, member 6	*
OR51E1	olfactory receptor, family 51, subfamily E, member 1	*
OR51F1	olfactory receptor, family 51, subfamily F, member 1	*
OR51M1	olfactory receptor, family 51, subfamily M, member 1	*
OR52A1	olfactory receptor, family 52, subfamily A, member 1	*
OR52D1	olfactory receptor, family 52, subfamily D, member 1	*
OR52E4	olfactory receptor, family 52, subfamily E, member 4	*
OR52K1	olfactory receptor, family 52, subfamily K, member 1	*
OR52L1	olfactory receptor, family 52, subfamily L, member 1	*
OR52R1	olfactory receptor, family 52, subfamily R, member 1	*
OR56A1	olfactory receptor, family 56, subfamily A, member 1	*
OR5A1	olfactory receptor, family 5, subfamily A, member 1	*
OR5A2	olfactory receptor, family 5, subfamily A, member 2	*
OR5AR1	olfactory receptor, family 5, subfamily AR, member 1	*
OR5D18	olfactory receptor, family 5, subfamily D, member 18	*
OR5H1	olfactory receptor, family 5, subfamily H, member 1
OR5H15	olfactory receptor, family 5, subfamily H, member 15
OR5K1	olfactory receptor, family 5, subfamily K, member 1	*
OR5K3	olfactory receptor, family 5, subfamily K, member 3
OR5M10	olfactory receptor, family 5, subfamily M, member 10	*
OR5M9	olfactory receptor, family 5, subfamily M, member 9	*
OR5P2	olfactory receptor, family 5, subfamily P, member 2	*
OR5P3	olfactory receptor, family 5, subfamily P, member 3	*
OR5V1	olfactory receptor, family 5, subfamily V, member 1	*
OR6C6	olfactory receptor, family 6, subfamily C, member 6
OR6S1	olfactory receptor, family 6, subfamily S, member 1	*
OR6T1	olfactory receptor, family 6, subfamily T, member 1	*
OR6X1	olfactory receptor, family 6, subfamily X, member 1	*
OR7A10	olfactory receptor, family 7, subfamily A, member 10	*
OR7D2	olfactory receptor, family 7, subfamily D, member 2	*
OR7D4	olfactory receptor, family 7, subfamily D, member 4	*
OR7E24	olfactory receptor, family 7, subfamily E, member 24	*
OR8D1	olfactory receptor, family 8, subfamily D, member 1	*
OR8J1	olfactory receptor, family 8, subfamily J, member 1	*
OR9A2	olfactory receptor, family 9, subfamily A, member 2	*
OR9G1	olfactory receptor, family 9, subfamily G, member 1	*
OR9G9	olfactory receptor, family 9, subfamily G, member 9	*
OR9I1	olfactory receptor, family 9, subfamily I, member 1	*
OSBPL7	oxysterol binding protein-like 7
OTOP1	otopetrin 1
OTOR	otoraplin
OVGP1	oviductal glycoprotein 1, 120kDa
P2RY4	pyrimidinergic receptor P2Y, G-protein coupled, 4
PABPC1L	poly(A) binding protein, cytoplasmic 1-like
PABPC3	poly(A) binding protein, cytoplasmic 3
PADI1	peptidyl arginine deiminase, type I
PADI4	peptidyl arginine deiminase, type IV	*
PAGE3	P antigen family, member 3 (prostate associated)	*
PAGE4	P antigen family, member 4 (prostate associated)
PAH	phenylalanine hydroxylase
PAIP2B	poly(A) binding protein interacting protein 2B
PAK3	p21 protein (Cdc42/Rac)-activated kinase 3	*
PAQR5	progestin and adipoQ receptor family member V	*
PARD6G	par-6 partitioning defective 6 homolog gamma (C. elegans)
PARL	presenilin associated, rhomboid-like
PARS2	prolyl-tRNA synthetase 2, mitochondrial (putative)
PASD1	PAS domain containing 1
PATE3	prostate and testis expressed 3	*
PAX7	paired box 7
PCBP3	poly(rC) binding protein 3
PCDH11X	protocadherin 11 X-linked
PCDH17	protocadherin 17
PCDH8	protocadherin 8
PCDHA1	protocadherin alpha 1	*
PCDHB1	protocadherin beta 1	*
PCDHB16	protocadherin beta 16
PCGEM1	prostate-specific transcript 1 (non-protein coding)
PCOLCE	procollagen C-endopeptidase enhancer
PCP4	Purkinje cell protein 4	*
PCYOX1L	prenylcysteine oxidase 1 like
PCYT1B	phosphate cytidylyltransferase 1, choline, beta
PDCD4	programmed cell death 4 (neoplastic transformation inhibitor)
PDE11A	phosphodiesterase 11A	*
PDE2A	phosphodiesterase 2A, cGMP-stimulated
PDE6B	phosphodiesterase 6B, cGMP-specific, rod, beta	*
PDHX	pyruvate dehydrogenase complex, component X
PDIA6	protein disulfide isomerase family A, member 6
PDRG1	p53 and DNA-damage regulated 1	*
PEG3	paternally expressed 3	*
PEX7	peroxisomal biogenesis factor 7
PFDN4	prefoldin subunit 4
PFDN5	prefoldin subunit 5
PGM5	phosphoglucomutase 5
PGM5P2	phosphoglucomutase 5 pseudogene 2
PHACTR3	phosphatase and actin regulator 3	*
PHEX	phosphate regulating endopeptidase homolog, X-linked
PHF6	PHD finger protein 6
PHGDH	phosphoglycerate dehydrogenase
PI4KA	phosphatidylinositol 4-kinase, catalytic, alpha
PIGC	phosphatidylinositol glycan anchor biosynthesis, class C
PIGK	phosphatidylinositol glycan anchor biosynthesis, class K
PIGM	phosphatidylinositol glycan anchor biosynthesis, class M
PIGR	polymeric immunoglobulin receptor
PIGS	phosphatidylinositol glycan anchor biosynthesis, class S
PIK3R6	phosphoinositide-3-kinase, regulatory subunit 6
PIP4K2C	phosphatidylinositol-5-phosphate 4-kinase, type II, gamma
PISRT1	polled intersex syndrome regulated transcript 1 (non-protein coding RNA)	*
PITPNM3	PITPNM family member 3
PIWIL3	piwi-like 3 (Drosophila)
PKD1L1	polycystic kidney disease 1 like 1
PKD2L1	polycystic kidney disease 2-like 1	*
PKHD1	polycystic kidney and hepatic disease 1 (autosomal recessive)
PKIB	protein kinase (cAMP-dependent, catalytic) inhibitor beta
PKP2	plakophilin 2
PLA2G2D	phospholipase A2, group IID	*
PLA2G2E	phospholipase A2, group IIE	*
PLA2G4E	phospholipase A2, group IVE
PLA2G7	phospholipase A2, group VII (platelet-activating factor acetylhydrolase, plasma)
PLAC4	placenta-specific 4	*
PLAGL2	pleiomorphic adenoma gene-like 2
PLCD4	phospholipase C, delta 4
PLEKHG7	pleckstrin homology domain containing, family G (with RhoGef domain) member 7
PLSCR5	phospholipid scramblase family, member 5
PMCHL1	pro-melanin-concentrating hormone-like 1, pseudogene	*
PMCHL2	pro-melanin-concentrating hormone-like 2, pseudogene	*
PMF1	polyamine-modulated factor 1
PMFBP1	polyamine modulated factor 1 binding protein 1
PMP22	peripheral myelin protein 22
PNLIPRP3	pancreatic lipase-related protein 3
PNOC	prepronociceptin
PNPLA8	patatin-like phospholipase domain containing 8
POGZ	pogo transposable element with ZNF domain
POLR2A	polymerase (RNA) II (DNA directed) polypeptide A, 220kDa
POLR2J	polymerase (RNA) II (DNA directed) polypeptide J, 13.3kDa
POLR2M	polymerase (RNA) II (DNA directed) polypeptide M
POM121L1P	POM121 transmembrane nucleoporin-like 1, pseudogene
POM121L4P	POM121 transmembrane nucleoporin-like 4 pseudogene
POM121L8P	POM121 transmembrane nucleoporin-like 8 pseudogene
POMGNT1	protein O-linked mannose beta1,2-N-acetylglucosaminyltransferase	*
POTEA	POTE ankyrin domain family, member A	*
POTEG	POTE ankyrin domain family, member G
POTEM	POTE ankyrin domain family, member M
POU3F4	POU class 3 homeobox 4
POU5F1	POU class 5 homeobox 1
PPAPDC1A	phosphatidic acid phosphatase type 2 domain containing 1A
PPCS	phosphopantothenoylcysteine synthetase
PPIE	peptidylprolyl isomerase E (cyclophilin E)
PPIEL	peptidylprolyl isomerase E-like pseudogene
PPIL3	peptidylprolyl isomerase (cyclophilin)-like 3
PPP1R14C	protein phosphatase 1, regulatory (inhibitor) subunit 14C
PPP1R1A	protein phosphatase 1, regulatory (inhibitor) subunit 1A
PPP1R1B	protein phosphatase 1, regulatory (inhibitor) subunit 1B	*
PPP1R3F	protein phosphatase 1, regulatory subunit 3F
PPP2R2B	protein phosphatase 2, regulatory subunit B, beta	*
PPP2R2C	protein phosphatase 2, regulatory subunit B, gamma
PPP2R2D	protein phosphatase 2, regulatory subunit B, delta
PPP5C	protein phosphatase 5, catalytic subunit
PQBP1	polyglutamine binding protein 1
PRAME	preferentially expressed antigen in melanoma
PRAMEF12	PRAME family member 12
PRAMEF15	PRAME family member 15	*
PRAMEF21	PRAME family member 21	*
PRAMEF4	PRAME family member 4
PRAMEF5	PRAME family member 5
PRAMEF6	PRAME family member 6
PRAMEF7	PRAME family member 7	*
PRAMEF9	PRAME family member 9	*
PRG3	proteoglycan 3
PRH2	proline-rich protein HaeIII subfamily 2	*
PRKAB1	protein kinase, AMP-activated, beta 1 non-catalytic subunit
PRKACG	protein kinase, cAMP-dependent, catalytic, gamma
PRKAG2	protein kinase, AMP-activated, gamma 2 non-catalytic subunit	*
PRKCB	protein kinase C, beta
PRKCQ	protein kinase C, theta
PROK1	prokineticin 1
PROM1	prominin 1	*
PROX2	prospero homeobox 2
PRR20A	proline rich 20A	*
PRR20B	proline rich 20B	*
PRR20C	proline rich 20C	*
PRR20D	proline rich 20D	*
PRR20E	proline rich 20E	*
PRR23B	proline rich 23B
PRRC1	proline-rich coiled-coil 1
PRSS3	protease, serine, 3	*
PRSS55	protease, serine, 55
PSG1	pregnancy specific beta-1-glycoprotein 1	*
PSG10P	pregnancy specific beta-1-glycoprotein 10, pseudogene	*
PSG2	pregnancy specific beta-1-glycoprotein 2	*
PSG4	pregnancy specific beta-1-glycoprotein 4
PSG5	pregnancy specific beta-1-glycoprotein 5	*
PSG6	pregnancy specific beta-1-glycoprotein 6	*
PSG7	pregnancy specific beta-1-glycoprotein 7 (gene/pseudogene)	*
PSMB8	proteasome (prosome, macropain) subunit, beta type, 8 (large multifunctional peptidase 7)
PSMC4	proteasome (prosome, macropain) 26S subunit, ATPase, 4
PSMF1	proteasome (prosome, macropain) inhibitor subunit 1 (PI31)	*
PSMG3	proteasome (prosome, macropain) assembly chaperone 3
PTCHD3	patched domain containing 3
PTH	parathyroid hormone
PTH2R	parathyroid hormone 2 receptor
PTN	pleiotrophin	*
PTPN3	protein tyrosine phosphatase, non-receptor type 3	*
PTPN5	protein tyrosine phosphatase, non-receptor type 5 (striatum-enriched)
PTPRE	protein tyrosine phosphatase, receptor type, E	*
PTPRVP	protein tyrosine phosphatase, receptor type, V, pseudogene	*
PTTG3P	pituitary tumor-transforming 3, pseudogene
PVALB	parvalbumin
PYCARD	PYD and CARD domain containing
PYCR1	pyrroline-5-carboxylate reductase 1
PYCRL	pyrroline-5-carboxylate reductase-like
PYROXD1	pyridine nucleotide-disulphide oxidoreductase domain 1
R3HDML	R3H domain containing-like
RAB20	RAB20, member RAS oncogene family
RAB25	RAB25, member RAS oncogene family	*
RAB41	RAB41, member RAS oncogene family
RAB5C	RAB5C, member RAS oncogene family
RAB6C	RAB6C, member RAS oncogene family
RABL2A	RAB, member of RAS oncogene family-like 2A
RABL5	RAB, member RAS oncogene family-like 5
RACGAP1	Rac GTPase activating protein 1
RADIL	Ras association and DIL domains
RANBP17	RAN binding protein 17
RARRES1	retinoic acid receptor responder (tazarotene induced) 1
RASGEF1B	RasGEF domain family, member 1B
RASSF10	Ras association (RalGDS/AF-6) domain family (N-terminal) member 10
RBFOX1	RNA binding protein, fox-1 homolog (C. elegans) 1	*
RBM10	RNA binding motif protein 10
RBM19	RNA binding motif protein 19
RBMX2	RNA binding motif protein, X-linked 2
RBPJ	recombination signal binding protein for immunoglobulin kappa J region
RCVRN	recoverin
RFC5	replication factor C (activator 1) 5, 36.5kDa
RFPL2	ret finger protein-like 2	*
RFPL3	ret finger protein-like 3	*
RFX4	regulatory factor X, 4 (influences HLA class II expression)	*
RGPD5	RANBP2-like and GRIP domain containing 5	*
RGPD6	RANBP2-like and GRIP domain containing 6	*
RGS16	regulator of G-protein signaling 16
RGS18	regulator of G-protein signaling 18
RGS22	regulator of G-protein signaling 22
RGS8	regulator of G-protein signaling 8	*
RHAG	Rh-associated glycoprotein
RHBDL3	rhomboid, veinlet-like 3 (Drosophila)
RHCE	Rh blood group, CcEe antigens	*
RHOXF1	Rhox homeobox family, member 1
RIPPLY1	ripply1 homolog (zebrafish)
RIPPLY2	ripply2 homolog (zebrafish)
RIT2	Ras-like without CAAX 2	*
RMST	rhabdomyosarcoma 2 associated transcript (non-protein coding)	*
RNASE1	ribonuclease, RNase A family, 1 (pancreatic)	*
RNF175	ring finger protein 175
RNF183	ring finger protein 183
RNF7	ring finger protein 7
ROPN1	rhophilin associated tail protein 1	*
ROPN1B	rhophilin associated tail protein 1B	*
RPE65	retinal pigment epithelium-specific protein 65kDa
RPGR	retinitis pigmentosa GTPase regulator
RPL10L	ribosomal protein L10-like	*
RPL12	ribosomal protein L12
RPL23AP7	ribosomal protein L23a pseudogene 7
RPL23AP82	ribosomal protein L23a pseudogene 82
RPL23P8	ribosomal protein L23 pseudogene 8	*
RPL32P3	ribosomal protein L32 pseudogene 3
RPL36A	ribosomal protein L36a
RPS6KA2	ribosomal protein S6 kinase, 90kDa, polypeptide 2
RRN3	RRN3 RNA polymerase I transcription factor homolog (S. cerevisiae)
RRP7A	ribosomal RNA processing 7 homolog A (S. cerevisiae)
RSAD2	radical S-adenosyl methionine domain containing 2
RSPH10B	radial spoke head 10 homolog B (Chlamydomonas)	*
RSPH10B2	radial spoke head 10 homolog B2 (Chlamydomonas)	*
RSU1	Ras suppressor protein 1
RTP4	receptor (chemosensory) transporter protein 4
S100A16	S100 calcium binding protein A16
SAG	S-antigen; retina and pineal gland (arrestin)	*
SALL2	sal-like 2 (Drosophila)
SAMD7	sterile alpha motif domain containing 7
SAMD9	sterile alpha motif domain containing 9
SAMD9L	sterile alpha motif domain containing 9-like
SBK1	SH3-binding domain kinase 1
SCARA5	scavenger receptor class A, member 5 (putative)
SCARB2	scavenger receptor class B, member 2
SCARNA10	small Cajal body-specific RNA 10
SCARNA27	small Cajal body-specific RNA 27
SCARNA6	small Cajal body-specific RNA 6
SCGB1A1	secretoglobin, family 1A, member 1 (uteroglobin)
SCGB1D2	secretoglobin, family 1D, member 2	*
SCGB2A1	secretoglobin, family 2A, member 1
SCGB2A2	secretoglobin, family 2A, member 2	*
SCN5A	sodium channel, voltage-gated, type V, alpha subunit
SCNN1G	sodium channel, non-voltage-gated 1, gamma subunit
SCOC	short coiled-coil protein
SCP2	sterol carrier protein 2
SCYL1	SCY1-like 1 (S. cerevisiae)
SCYL3	SCY1-like 3 (S. cerevisiae)
SDHA	succinate dehydrogenase complex, subunit A, flavoprotein (Fp)
SDHAP2	succinate dehydrogenase complex, subunit A, flavoprotein pseudogene 2
SDK1	sidekick cell adhesion molecule 1	*
SDR9C7	short chain dehydrogenase/reductase family 9C, member 7
SDSL	serine dehydratase-like
SEC13	SEC13 homolog (S. cerevisiae)
SEC14L3	SEC14-like 3 (S. cerevisiae)
SEC23IP	SEC23 interacting protein
SEL1L2	sel-1 suppressor of lin-12-like 2 (C. elegans)
SEMG1	semenogelin I	*
SEPP1	selenoprotein P, plasma, 1
2005-08-31	septin 9	*
SERHL	serine hydrolase-like
SERHL2	serine hydrolase-like 2
SERPINA1	serpin peptidase inhibitor, clade A (alpha-1 antiproteinase, antitrypsin), member 1	*
SERPINA12	serpin peptidase inhibitor, clade A (alpha-1 antiproteinase, antitrypsin), member 12	*
SERPINA13	serpin peptidase inhibitor, clade A (alpha-1 antiproteinase, antitrypsin), member 13 (pseudogene)
SERPINA4	serpin peptidase inhibitor, clade A (alpha-1 antiproteinase, antitrypsin), member 4
SERPINA9	serpin peptidase inhibitor, clade A (alpha-1 antiproteinase, antitrypsin), member 9	*
SERPINB11	serpin peptidase inhibitor, clade B (ovalbumin), member 11 (gene/pseudogene)
SERPINB8	serpin peptidase inhibitor, clade B (ovalbumin), member 8
SERPIND1	serpin peptidase inhibitor, clade D (heparin cofactor), member 1
SERPING1	serpin peptidase inhibitor, clade G (C1 inhibitor), member 1
SERPINI2	serpin peptidase inhibitor, clade I (pancpin), member 2
SFSWAP	splicing factor, suppressor of white-apricot homolog (Drosophila)
SFTPA1	surfactant protein A1	*
SFTPD	surfactant protein D	*
SFXN1	sideroflexin 1
SGCG	sarcoglycan, gamma (35kDa dystrophin-associated glycoprotein)
SGK2	serum/glucocorticoid regulated kinase 2	*
SH3KBP1	SH3-domain kinase binding protein 1	*
SHC4	SHC (Src homology 2 domain containing) family, member 4
SHISA5	shisa homolog 5 (Xenopus laevis)
SHISA6	shisa homolog 6 (Xenopus laevis)
SHISA9	shisa homolog 9 (Xenopus laevis)
SIPA1L2	signal-induced proliferation-associated 1 like 2	*
SIRPB1	signal-regulatory protein beta 1	*
SIVA1	SIVA1, apoptosis-inducing factor
SKI	v-ski sarcoma viral oncogene homolog (avian)
SLA	Src-like-adaptor
SLAMF1	signaling lymphocytic activation molecule family member 1
SLC12A1	solute carrier family 12 (sodium/potassium/chloride transporters), member 1
SLC13A1	solute carrier family 13 (sodium/sulfate symporters), member 1	*
SLC16A14	solute carrier family 16, member 14 (monocarboxylic acid transporter 14)
SLC19A3	solute carrier family 19, member 3
SLC22A12	solute carrier family 22 (organic anion/urate transporter), member 12	*
SLC22A13	solute carrier family 22 (organic anion transporter), member 13	*
SLC22A16	solute carrier family 22 (organic cation/carnitine transporter), member 16
SLC22A3	solute carrier family 22 (extraneuronal monoamine transporter), member 3
SLC22A6	solute carrier family 22 (organic anion transporter), member 6
SLC22A8	solute carrier family 22 (organic anion transporter), member 8
SLC23A2	solute carrier family 23 (nucleobase transporters), member 2
SLC25A13	solute carrier family 25 (aspartate/glutamate carrier), member 13
SLC25A3	solute carrier family 25 (mitochondrial carrier; phosphate carrier), member 3
SLC25A52	solute carrier family 25, member 52
SLC25A53	solute carrier family 25, member 53
SLC25A6	solute carrier family 25 (mitochondrial carrier; adenine nucleotide translocator), member 6	*
SLC26A9	solute carrier family 26, member 9
SLC27A6	solute carrier family 27 (fatty acid transporter), member 6	*
SLC2A1	solute carrier family 2 (facilitated glucose transporter), member 1
SLC2A9	solute carrier family 2 (facilitated glucose transporter), member 9	*
SLC30A5	solute carrier family 30 (zinc transporter), member 5
SLC31A2	solute carrier family 31 (copper transporters), member 2
SLC35A2	solute carrier family 35 (UDP-galactose transporter), member A2
SLC38A5	solute carrier family 38, member 5	*
SLC39A11	solute carrier family 39 (metal ion transporter), member 11
SLC39A12	solute carrier family 39 (zinc transporter), member 12
SLC39A8	solute carrier family 39 (zinc transporter), member 8
SLC46A1	solute carrier family 46 (folate transporter), member 1
SLC4A10	solute carrier family 4, sodium bicarbonate transporter, member 10	*
SLC4A1AP	solute carrier family 4 (anion exchanger), member 1, adaptor protein
SLC50A1	solute carrier family 50 (sugar transporter), member 1
SLC5A1	solute carrier family 5 (sodium/glucose cotransporter), member 1
SLC5A11	solute carrier family 5 (sodium/glucose cotransporter), member 11
SLC6A10P	solute carrier family 6 (neurotransmitter transporter, creatine), member 10, pseudogene
SLC6A2	solute carrier family 6 (neurotransmitter transporter, noradrenalin), member 2
SLC7A5P1	solute carrier family 7 (amino acid transporter light chain, L system), member 5 pseudogene 1
SLC8A3	solute carrier family 8 (sodium/calcium exchanger), member 3	*
SLC9A4	solute carrier family 9, subfamily A (NHE4, cation proton antiporter 4), member 4
SLC9A8	solute carrier family 9, subfamily A (NHE8, cation proton antiporter 8), member 8
SLCO1B7	solute carrier organic anion transporter family, member 1B7 (non-functional)
SLCO1C1	solute carrier organic anion transporter family, member 1C1
SLCO4C1	solute carrier organic anion transporter family, member 4C1
SLCO5A1	solute carrier organic anion transporter family, member 5A1
SLMO2	slowmo homolog 2 (Drosophila)
SLURP1	secreted LY6/PLAUR domain containing 1
SMPX	small muscle protein, X-linked
SMTNL2	smoothelin-like 2
SMYD3	SET and MYND domain containing 3
SNHG9	small nucleolar RNA host gene 9 (non-protein coding)
SNORA11C	small nucleolar RNA, H/ACA box 11C
SNORA54	small nucleolar RNA, H/ACA box 54	*
SNORA59A	small nucleolar RNA, H/ACA box 59A
SNORA59B	small nucleolar RNA, H/ACA box 59B
SNORA78	small nucleolar RNA, H/ACA box 78
SNORD108	small nucleolar RNA, C/D box 108
SNORD112	small nucleolar RNA, C/D box 112
SNORD115-13	small nucleolar RNA, C/D box 115-13
SNORD115-3	small nucleolar RNA, C/D box 115-3	*
SNORD115-37	small nucleolar RNA, C/D box 115-37
SNORD115-4	small nucleolar RNA, C/D box 115-4
SNORD116-10	small nucleolar RNA, C/D box 116-10
SNORD116-14	small nucleolar RNA, C/D box 116-14	*
SNORD116-2	small nucleolar RNA, C/D box 116-2	*
SNORD116-20	small nucleolar RNA, C/D box 116-20	*
SNORD116-24	small nucleolar RNA, C/D box 116-24
SNORD116-27	small nucleolar RNA, C/D box 116-27
SNORD14E	small nucleolar RNA, C/D box 14E
SNORD62A	small nucleolar RNA, C/D box 62A
SNORD62B	small nucleolar RNA, C/D box 62B
SNORD9	small nucleolar RNA, C/D box 9
SNORD96B	small nucleolar RNA, C/D box 96B
SNRPN	small nuclear ribonucleoprotein polypeptide N	*
SOCS7	suppressor of cytokine signaling 7
SOHLH2	spermatogenesis and oogenesis specific basic helix-loop-helix 2
SORBS2	sorbin and SH3 domain containing 2	*
SOX5	SRY (sex determining region Y)-box 5
SOX6	SRY (sex determining region Y)-box 6	*
SP110	SP110 nuclear body protein
SP140	SP140 nuclear body protein	*
SP140L	SP140 nuclear body protein-like
SPACA5	sperm acrosome associated 5	*
SPACA7	sperm acrosome associated 7
SPAG17	sperm associated antigen 17
SPAM1	sperm adhesion molecule 1 (PH-20 hyaluronidase, zona pellucida binding)	*
SPATA3	spermatogenesis associated 3	*
SPATA4	spermatogenesis associated 4
SPATC1	spermatogenesis and centriole associated 1	*
SPC25	SPC25, NDC80 kinetochore complex component, homolog (S. cerevisiae)
SPDEF	SAM pointed domain containing ets transcription factor
SPDYE6	speedy homolog E6 (Xenopus laevis)
SPDYE8P	speedy homolog E8 (Xenopus laevis), pseudogene
SPG20	spastic paraplegia 20 (Troyer syndrome)
SPIC	Spi-C transcription factor (Spi-1/PU.1 related)
SPINK8	serine peptidase inhibitor, Kazal type 8 (putative)
SPINK9	serine peptidase inhibitor, Kazal type 9	*
SPINT3	serine peptidase inhibitor, Kunitz type, 3	*
SPN	sialophorin	*
SPO11	SPO11 meiotic protein covalently bound to DSB homolog (S. cerevisiae)
SPOCK1	sparc/osteonectin, cwcv and kazal-like domains proteoglycan (testican) 1
SPOCK3	sparc/osteonectin, cwcv and kazal-like domains proteoglycan (testican) 3
SPP2	secreted phosphoprotein 2, 24kDa
SPPL2C	signal peptide peptidase like 2C
SPRY3	sprouty homolog 3 (Drosophila)	*
SPTB	spectrin, beta, erythrocytic
SPTLC2	serine palmitoyltransferase, long chain base subunit 2
SRC	v-src sarcoma (Schmidt-Ruppin A-2) viral oncogene homolog (avian)
SRD5A2	steroid-5-alpha-reductase, alpha polypeptide 2 (3-oxo-5 alpha-steroid delta 4-dehydrogenase alpha 2)
SRL	sarcalumenin
SRPX	sushi-repeat containing protein, X-linked
SRPX2	sushi-repeat containing protein, X-linked 2
SRRM4	serine/arginine repetitive matrix 4
SSTR5	somatostatin receptor 5
SSX2	synovial sarcoma, X breakpoint 2	*
SSX3	synovial sarcoma, X breakpoint 3	*
SSX4	synovial sarcoma, X breakpoint 4	*
SSX4B	synovial sarcoma, X breakpoint 4B	*
SSX6	synovial sarcoma, X breakpoint 6 (pseudogene)	*
SSX9	synovial sarcoma, X breakpoint 9	*
ST6GAL1	ST6 beta-galactosamide alpha-2,6-sialyltranferase 1
ST8SIA2	ST8 alpha-N-acetyl-neuraminide alpha-2,8-sialyltransferase 2
STAG3L4	stromal antigen 3-like 4
STAM2	signal transducing adaptor molecule (SH3 domain and ITAM motif) 2
STARD3NL	STARD3 N-terminal like
STATH	statherin
STMN4	stathmin-like 4	*
STON1-GTF2A1L	STON1-GTF2A1L readthrough
STRA8	stimulated by retinoic acid gene 8 homolog (mouse)	*
SULT1C4	sulfotransferase family, cytosolic, 1C, member 4
SULT2B1	sulfotransferase family, cytosolic, 2B, member 1	*
SUN5	Sad1 and UNC84 domain containing 5
SV2B	synaptic vesicle glycoprotein 2B	*
SYBU	syntabulin (syntaxin-interacting)	*
SYCP2L	synaptonemal complex protein 2-like	*
SYDE1	synapse defective 1, Rho GTPase, homolog 1 (C. elegans)
SYN1	synapsin I
SYN2	synapsin II
SYNC	syncoilin, intermediate filament protein
SYNE1	spectrin repeat containing, nuclear envelope 1
SYNE2	spectrin repeat containing, nuclear envelope 2	*
SYNJ2BP	synaptojanin 2 binding protein
SYNPR	synaptoporin	*
SYT10	synaptotagmin X
SYT2	synaptotagmin II
SYT6	synaptotagmin VI
SYTL1	synaptotagmin-like 1
SZT2	seizure threshold 2 homolog (mouse)	*
TAAR2	trace amine associated receptor 2	*
TAAR5	trace amine associated receptor 5	*
TAAR9	trace amine associated receptor 9 (gene/pseudogene)	*
TACC2	transforming, acidic coiled-coil containing protein 2	*
TAF10	TAF10 RNA polymerase II, TATA box binding protein (TBP)-associated factor, 30kDa
TAF1D	TATA box binding protein (TBP)-associated factor, RNA polymerase I, D, 41kDa
TAMM41	TAM41, mitochondrial translocator assembly and maintenance protein, homolog (S. cerevisiae)
TAS2R16	taste receptor, type 2, member 16	*
TAS2R38	taste receptor, type 2, member 38	*
TAS2R4	taste receptor, type 2, member 4	*
TAS2R5	taste receptor, type 2, member 5	*
TAS2R8	taste receptor, type 2, member 8
TAZ	tafazzin
TBC1D22B	TBC1 domain family, member 22B
TBX10	T-box 10
TBX5	T-box 5
TBXAS1	thromboxane A synthase 1 (platelet)	*
TCEAL7	transcription elongation factor A (SII)-like 7
TCEAL8	transcription elongation factor A (SII)-like 8
TCEB3C	transcription elongation factor B polypeptide 3C (elongin A3)
TCEB3CL	transcription elongation factor B polypeptide 3C-like
TCL1A	T-cell leukemia/lymphoma 1A
TCL1B	T-cell leukemia/lymphoma 1B
TCN1	transcobalamin I (vitamin B12 binding protein, R binder family)	*
TCP10L	t-complex 10 (mouse)-like	*
TCP10L2	t-complex 10-like 2 (mouse)	*
TDGF1	teratocarcinoma-derived growth factor 1	*
TDGF1P3	teratocarcinoma-derived growth factor 1 pseudogene 3	*
TEPP	testis, prostate and placenta expressed
TESPA1	thymocyte expressed, positive selection associated 1	*
TET3	tet methylcytosine dioxygenase 3
TEX10	testis expressed 10
TEX101	testis expressed 101	*
TEX13A	testis expressed 13A
TEX13B	testis expressed 13B
TEX28	testis expressed 28
TEX33	testis expressed 33
TEX37	testis expressed 37
TF	transferrin
TFAP2A	transcription factor AP-2 alpha (activating enhancer binding protein 2 alpha)
TFDP2	transcription factor Dp-2 (E2F dimerization partner 2)
TFEC	transcription factor EC
TFF1	trefoil factor 1
TGM4	transglutaminase 4 (prostate)	*
THOC5	THO complex 5
TIE1	tyrosine kinase with immunoglobulin-like and EGF-like domains 1
TIMD4	T-cell immunoglobulin and mucin domain containing 4	*
TIMELESS	timeless homolog (Drosophila)
TIPARP	TCDD-inducible poly(ADP-ribose) polymerase
TIRAP	toll-interleukin 1 receptor (TIR) domain containing adaptor protein
TISP43	uncharacterized LOC150527
TJAP1	tight junction associated protein 1 (peripheral)
TLE2	transducin-like enhancer of split 2 (E(sp1) homolog, Drosophila)	*
TLN2	talin 2
TLR4	toll-like receptor 4	*
TLR5	toll-like receptor 5
TMBIM6	transmembrane BAX inhibitor motif containing 6
TMEM116	transmembrane protein 116
TMEM120B	transmembrane protein 120B
TMEM123	transmembrane protein 123
TMEM139	transmembrane protein 139
TMEM143	transmembrane protein 143
TMEM14C	transmembrane protein 14C
TMEM163	transmembrane protein 163
TMEM176B	transmembrane protein 176B	*
TMEM182	transmembrane protein 182
TMEM215	transmembrane protein 215
TMEM236	transmembrane protein 236
TMEM33	transmembrane protein 33
TMEM35	transmembrane protein 35	*
TMEM37	transmembrane protein 37
TMEM8C	transmembrane protein 8C	*
TMEM9	transmembrane protein 9
TMEM9B	TMEM9 domain family, member B
TMPRSS11A	transmembrane protease, serine 11A
TMPRSS11F	transmembrane protease, serine 11F
TMPRSS12	transmembrane (C-terminal) protease, serine 12
TMPRSS3	transmembrane protease, serine 3	*
TMPRSS4	transmembrane protease, serine 4	*
TMPRSS5	transmembrane protease, serine 5	*
TMSB15A	thymosin beta 15a
TNFAIP8	tumor necrosis factor, alpha-induced protein 8
TNFSF8	tumor necrosis factor (ligand) superfamily, member 8	*
TNNI1	troponin I type 1 (skeletal, slow)
TNPO3	transportin 3
TNS1	tensin 1
TNXA	tenascin XA (pseudogene)
TOMM34	translocase of outer mitochondrial membrane 34
TOMM40	translocase of outer mitochondrial membrane 40 homolog (yeast)
TOP1P2	topoisomerase (DNA) I pseudogene 2
TP53	tumor protein p53
TP53TG3	TP53 target 3	*
TP53TG5	TP53 target 5
TP73-AS1	TP73 antisense RNA 1
TPD52	tumor protein D52
TPRG1	tumor protein p63 regulated 1	*
TPSAB1	tryptase alpha/beta 1
TPSB2	tryptase beta 2 (gene/pseudogene)	*
TPSD1	tryptase delta 1
TPST2	tyrosylprotein sulfotransferase 2
TRAF3IP2	TRAF3 interacting protein 2
TRAK1	trafficking protein, kinesin binding 1	*
TRIL	TLR4 interactor with leucine-rich repeats
TRIM29	tripartite motif containing 29
TRIM34	tripartite motif containing 34
TRIM35	tripartite motif containing 35
TRIM45	tripartite motif containing 45
TRIM48	tripartite motif containing 48
TRIM50	tripartite motif containing 50
TRIM51	tripartite motif-containing 51	*
TRIM58	tripartite motif containing 58
TRIM61	tripartite motif containing 61
TRIM64	tripartite motif containing 64	*
TRIM73	tripartite motif containing 73	*
TRIM78P	tripartite motif containing 78, pseudogene	*
TRIML2	tripartite motif family-like 2	*
TRNP1	TMF1-regulated nuclear protein 1
TRPC2	transient receptor potential cation channel, subfamily C, member 2, pseudogene	*
TRPM3	transient receptor potential cation channel, subfamily M, member 3	*
TRPM6	transient receptor potential cation channel, subfamily M, member 6
TRPV2	transient receptor potential cation channel, subfamily V, member 2
TRPV6	transient receptor potential cation channel, subfamily V, member 6	*
TSFM	Ts translation elongation factor, mitochondrial
TSIX	TSIX transcript, XIST antisense RNA
TSPAN11	tetraspanin 11
TSPAN18	tetraspanin 18
TSPAN7	tetraspanin 7
TSPAN8	tetraspanin 8
TTC27	tetratricopeptide repeat domain 27
TTC4	tetratricopeptide repeat domain 4
TUB	tubby homolog (mouse)	*
TUBA3C	tubulin, alpha 3c	*
TUBA3D	tubulin, alpha 3d	*
TUBA3E	tubulin, alpha 3e	*
TUBA3FP	tubulin, alpha 3f, pseudogene
TUBA4B	tubulin, alpha 4b (pseudogene)
TXK	TXK tyrosine kinase
TXNL4B	thioredoxin-like 4B
TXNRD3NB	thioredoxin reductase 3 neighbor
UBAC1	UBA domain containing 1
UBE2I	ubiquitin-conjugating enzyme E2I	*
UBE2MP1	ubiquitin-conjugating enzyme E2M pseudogene 1
UBE2Q2P1	ubiquitin-conjugating enzyme E2Q family member 2 pseudogene 1	*
UBE2QL1	ubiquitin-conjugating enzyme E2Q family-like 1
UBE2S	ubiquitin-conjugating enzyme E2S
UBTFL1	upstream binding transcription factor, RNA polymerase I-like 1	*
UBXN10	UBX domain protein 10
UCMA	upper zone of growth plate and cartilage matrix associated	*
UCN3	urocortin 3 (stresscopin)	*
UGT1A1	UDP glucuronosyltransferase 1 family, polypeptide A1	*
UGT1A5	UDP glucuronosyltransferase 1 family, polypeptide A5	*
UGT2A3	UDP glucuronosyltransferase 2 family, polypeptide A3
UGT2B4	UDP glucuronosyltransferase 2 family, polypeptide B4
UGT2B7	UDP glucuronosyltransferase 2 family, polypeptide B7
ULK4	unc-51-like kinase 4 (C. elegans)	*
ULK4P1	unc-51-like kinase 4 (C. elegans) pseudogene 1	*
ULK4P2	unc-51-like kinase 4 (C. elegans) pseudogene 2	*
ULK4P3	unc-51-like kinase 4 (C. elegans) pseudogene 3
UNC13C	unc-13 homolog C (C. elegans)	*
UNC5B	unc-5 homolog B (C. elegans)
UNC80	unc-80 homolog (C. elegans)
UNC93A	unc-93 homolog A (C. elegans)	*
UNQ6494	uncharacterized LOC100129066
UPF3B	UPF3 regulator of nonsense transcripts homolog B (yeast)
UPP2	uridine phosphorylase 2	*
URI1	URI1, prefoldin-like chaperone
USF1	upstream transcription factor 1
USH1G	Usher syndrome 1G (autosomal recessive)
USH2A	Usher syndrome 2A (autosomal recessive, mild)	*
USP11	ubiquitin specific peptidase 11
USP29	ubiquitin specific peptidase 29
USP31	ubiquitin specific peptidase 31
USP51	ubiquitin specific peptidase 51
UTP14A	UTP14, U3 small nucleolar ribonucleoprotein, homolog A (yeast)	*
UTP14C	UTP14, U3 small nucleolar ribonucleoprotein, homolog C (yeast)
VAMP7	vesicle-associated membrane protein 7	*
VANGL1	vang-like 1 (van gogh, Drosophila)
VANGL2	vang-like 2 (van gogh, Drosophila)
VAV3	vav 3 guanine nucleotide exchange factor
VAX2	ventral anterior homeobox 2
VCX	variable charge, X-linked
VIPR2	vasoactive intestinal peptide receptor 2	*
VN1R5	vomeronasal 1 receptor 5 (gene/pseudogene)	*
VPREB3	pre-B lymphocyte 3
VRK1	vaccinia related kinase 1
VSIG8	V-set and immunoglobulin domain containing 8
VSTM1	V-set and transmembrane domain containing 1	*
VWA2	von Willebrand factor A domain containing 2
VWA3A	von Willebrand factor A domain containing 3A
WASH1	WAS protein family homolog 1
WASH2P	WAS protein family homolog 2 pseudogene
WASH3P	WAS protein family homolog 3 pseudogene
WASH7P	WAS protein family homolog 7 pseudogene
WDFY2	WD repeat and FYVE domain containing 2
WDFY4	WDFY family member 4	*
WDR1	WD repeat domain 1
WDR45	WD repeat domain 45
WDR55	WD repeat domain 55
WDR64	WD repeat domain 64	*
WDR72	WD repeat domain 72
WNK3	WNK lysine deficient protein kinase 3
WNT16	wingless-type MMTV integration site family, member 16	*
WNT7A	wingless-type MMTV integration site family, member 7A
WSCD2	WSC domain containing 2
XAGE1A	X antigen family, member 1A	*
XAGE1B	X antigen family, member 1B	*
XAGE1C	X antigen family, member 1C	*
XAGE1D	X antigen family, member 1D	*
XAGE1E	X antigen family, member 1E	*
XAGE3	X antigen family, member 3	*
XKRX	XK, Kell blood group complex subunit-related, X-linked	*
YES1	v-yes-1 Yamaguchi sarcoma viral oncogene homolog 1
ZBTB24	zinc finger and BTB domain containing 24
ZC3H12D	zinc finger CCCH-type containing 12D
ZC4H2	zinc finger, C4H2 domain containing	*
ZCCHC12	zinc finger, CCHC domain containing 12
ZCCHC16	zinc finger, CCHC domain containing 16	*
ZCWPW2	zinc finger, CW type with PWWP domain 2	*
ZDHHC11	zinc finger, DHHC-type containing 11
ZDHHC15	zinc finger, DHHC-type containing 15	*
ZFAND4	zinc finger, AN1-type domain 4
ZFAT	zinc finger and AT hook domain containing
ZFP1	zinc finger protein 1 homolog (mouse)
ZFP161	zinc finger protein 161 homolog (mouse)
ZFP92	zinc finger protein 92 homolog (mouse)
ZIM2	zinc finger, imprinted 2
ZNF124	zinc finger protein 124
ZNF132	zinc finger protein 132
ZNF165	zinc finger protein 165
ZNF18	zinc finger protein 18
ZNF181	zinc finger protein 181
ZNF2	zinc finger protein 2
ZNF211	zinc finger protein 211
ZNF221	zinc finger protein 221
ZNF239	zinc finger protein 239	*
ZNF273	zinc finger protein 273
ZNF286B	zinc finger protein 286B
ZNF295	zinc finger protein 295
ZNF321P	zinc finger protein 321, pseudogene
ZNF331	zinc finger protein 331	*
ZNF33A	zinc finger protein 33A
ZNF33B	zinc finger protein 33B
[truncated: 32 more rows]

## Sheet: LMNA, upstream-proximal
Table S1 (cont.). Genes enriched in LMNA in the upstream-proximal promoter region
symbol	description	redundant with at least one other region
A2M	alpha-2-macroglobulin
A4GNT	alpha-1,4-N-acetylglucosaminyltransferase
AACSP1	acetoacetyl-CoA synthetase pseudogene 1	*
AADAC	arylacetamide deacetylase	*
ABAT	4-aminobutyrate aminotransferase
ABCB11	ATP-binding cassette, sub-family B (MDR/TAP), member 11	*
ABCB8	ATP-binding cassette, sub-family B (MDR/TAP), member 8
ABCC11	ATP-binding cassette, sub-family C (CFTR/MRP), member 11	*
ABCC12	ATP-binding cassette, sub-family C (CFTR/MRP), member 12
ABCC13	ATP-binding cassette, sub-family C (CFTR/MRP), member 13, pseudogene
ABCG4	ATP-binding cassette, sub-family G (WHITE), member 4	*
ABCG5	ATP-binding cassette, sub-family G (WHITE), member 5
ABLIM1	actin binding LIM protein 1	*
ABP1	amiloride binding protein 1 (amine oxidase (copper-containing))	*
ABRA	actin-binding Rho activating protein
ACACB	acetyl-CoA carboxylase beta
ACE2	angiotensin I converting enzyme (peptidyl-dipeptidase A) 2
ACRV1	acrosomal vesicle protein 1
ACSM1	acyl-CoA synthetase medium-chain family member 1	*
ACSM2A	acyl-CoA synthetase medium-chain family member 2A
ACSM2B	acyl-CoA synthetase medium-chain family member 2B
ACSM4	acyl-CoA synthetase medium-chain family member 4
ACSS3	acyl-CoA synthetase short-chain family member 3
ACTL7A	actin-like 7A
ACTL7B	actin-like 7B
ADAM2	ADAM metallopeptidase domain 2
ADAM21	ADAM metallopeptidase domain 21
ADAM29	ADAM metallopeptidase domain 29
ADAM5	ADAM metallopeptidase domain 5, pseudogene
ADAM6	ADAM metallopeptidase domain 6, pseudogene
ADAMTS20	ADAM metallopeptidase with thrombospondin type 1 motif, 20
ADARB2-AS1	ADARB2 antisense RNA 1	*
ADH1A	alcohol dehydrogenase 1A (class I), alpha polypeptide
ADORA3	adenosine A3 receptor
ADSSL1	adenylosuccinate synthase like 1
AFF3	AF4/FMR2 family, member 3
AGBL1	ATP/GTP binding protein-like 1
AGGF1	angiogenic factor with G patch and FHA domains 1
AGXT	alanine-glyoxylate aminotransferase
AHNAK2	AHNAK nucleoprotein 2
AHRR	aryl-hydrocarbon receptor repressor	*
AHSG	alpha-2-HS-glycoprotein
AIM1L	absent in melanoma 1-like
AIM2	absent in melanoma 2
AKAP6	A kinase (PRKA) anchor protein 6
AKNA	AT-hook transcription factor
AKR1B15	aldo-keto reductase family 1, member B15
AKR1D1	aldo-keto reductase family 1, member D1 (delta 4-3-ketosteroid-5-beta-reductase)
ALAS2	aminolevulinate, delta-, synthase 2
ALDH1L1	aldehyde dehydrogenase 1 family, member L1
ALDH3A1	aldehyde dehydrogenase 3 family, member A1	*
ALDH3B2	aldehyde dehydrogenase 3 family, member B2
ALG1L2	asparagine-linked glycosylation 1-like 2	*
ALMS1P	Alstrom syndrome 1 pseudogene
ALOX12P2	arachidonate 12-lipoxygenase pseudogene 2
ALPI	alkaline phosphatase, intestinal
AMICA1	adhesion molecule, interacts with CXADR antigen 1	*
AMY1A	amylase, alpha 1A (salivary)
AMY1B	amylase, alpha 1B (salivary)
AMY1C	amylase, alpha 1C (salivary)
AMY2A	amylase, alpha 2A (pancreatic)
ANKRD30BL	ankyrin repeat domain 30B-like
ANKRD30BP2	ankyrin repeat domain 30B pseudogene 2
ANKRD44	ankyrin repeat domain 44
ANKRD45	ankyrin repeat domain 45
ANKRD7	ankyrin repeat domain 7	*
ANKS1B	ankyrin repeat and sterile alpha motif domain containing 1B
ANO3	anoctamin 3
ANP32AP1	acidic (leucine-rich) nuclear phosphoprotein 32 family, member A pseudogene 1
ANP32C	acidic (leucine-rich) nuclear phosphoprotein 32 family, member C
ANP32D	acidic (leucine-rich) nuclear phosphoprotein 32 family, member D
AOAH	acyloxyacyl hydrolase (neutrophil)
AOC4	amine oxidase, copper containing 3 (vascular adhesion protein 1) pseudogene
APBA2	amyloid beta (A4) precursor protein-binding, family A, member 2
APCS	amyloid P component, serum
APOBEC3F	apolipoprotein B mRNA editing enzyme, catalytic polypeptide-like 3F
APOBEC3G	apolipoprotein B mRNA editing enzyme, catalytic polypeptide-like 3G
APOBEC4	apolipoprotein B mRNA editing enzyme, catalytic polypeptide-like 4 (putative)
APOC1	apolipoprotein C-I
APOC2	apolipoprotein C-II
APOD	apolipoprotein D	*
APOL1	apolipoprotein L, 1
APOL3	apolipoprotein L, 3
APOL4	apolipoprotein L, 4
AQP1	aquaporin 1 (Colton blood group)
AQP12B	aquaporin 12B
AQP4	aquaporin 4
AQP6	aquaporin 6, kidney specific
AR	androgen receptor
ARGFX	arginine-fifty homeobox
ARHGAP15	Rho GTPase activating protein 15
ARHGAP25	Rho GTPase activating protein 25
ARHGAP27	Rho GTPase activating protein 27
ARHGAP9	Rho GTPase activating protein 9	*
ARHGEF33	Rho guanine nucleotide exchange factor (GEF) 33
ARHGEF38	Rho guanine nucleotide exchange factor (GEF) 38
ARHGEF6	Rac/Cdc42 guanine nucleotide exchange factor (GEF) 6
ARHGEF7	Rho guanine nucleotide exchange factor (GEF) 7	*
ARMCX2	armadillo repeat containing, X-linked 2
ARPP21	cAMP-regulated phosphoprotein, 21kDa
ARR3	arrestin 3, retinal (X-arrestin)
ARSH	arylsulfatase family, member H
ASB12	ankyrin repeat and SOCS box containing 12
ASB14	ankyrin repeat and SOCS box containing 14
ASB18	ankyrin repeat and SOCS box containing 18
ASIP	agouti signaling protein
ASPG	asparaginase homolog (S. cerevisiae)
ATL2	atlastin GTPase 2
ATN1	atrophin 1
ATP13A4	ATPase type 13A4	*
ATP13A5	ATPase type 13A5
ATP1A3	ATPase, Na+/K+ transporting, alpha 3 polypeptide
ATP1A4	ATPase, Na+/K+ transporting, alpha 4 polypeptide
ATP1B4	ATPase, Na+/K+ transporting, beta 4 polypeptide	*
ATP2B3	ATPase, Ca++ transporting, plasma membrane 3
ATP5EP2	ATP synthase, H+ transporting, mitochondrial F1 complex, epsilon subunit pseudogene 2	*
ATP6V0A4	ATPase, H+ transporting, lysosomal V0 subunit a4	*
ATP6V1E2	ATPase, H+ transporting, lysosomal 31kDa, V1 subunit E2
ATP8B5P	ATPase, class I, type 8B, member 5, pseudogene
ATPAF1-AS1	ATPAF1 antisense RNA 1
AVPR2	arginine vasopressin receptor 2
AZGP1	alpha-2-glycoprotein 1, zinc-binding
B3GALT1	UDP-Gal:betaGlcNAc beta 1,3-galactosyltransferase, polypeptide 1
B3GAT2	beta-1,3-glucuronyltransferase 2 (glucuronosyltransferase S)
BAAT	bile acid CoA: amino acid N-acyltransferase (glycine N-choloyltransferase)	*
BAGE	B melanoma antigen	*
BAGE2	B melanoma antigen family, member 2	*
BAGE3	B melanoma antigen family, member 3	*
BAGE4	B melanoma antigen family, member 4	*
BAGE5	B melanoma antigen family, member 5	*
BANF2	barrier to autointegration factor 2	*
BATF	basic leucine zipper transcription factor, ATF-like
BBOX1	butyrobetaine (gamma), 2-oxoglutarate dioxygenase (gamma-butyrobetaine hydroxylase) 1
BCL2L14	BCL2-like 14 (apoptosis facilitator)	*
BCRP3	breakpoint cluster region pseudogene 3	*
BEND2	BEN domain containing 2
BEND4	BEN domain containing 4
BEND7	BEN domain containing 7
BFSP2	beaded filament structural protein 2, phakinin	*
BICD1	bicaudal D homolog 1 (Drosophila)
BLNK	B-cell linker	*
BMP10	bone morphogenetic protein 10
BMP3	bone morphogenetic protein 3	*
BNIPL	BCL2/adenovirus E1B 19kD interacting protein like	*
BPESC1	blepharophimosis, epicanthus inversus and ptosis, candidate 1 (non-protein coding)
BPIFA1	BPI fold containing family A, member 1
BPIFA3	BPI fold containing family A, member 3	*
BPIFB2	BPI fold containing family B, member 2
BPIFB4	BPI fold containing family B, member 4
BPIFC	BPI fold containing family C	*
BRDT	bromodomain, testis-specific	*
BREA2	breast cancer estrogen-induced apoptosis 2
BRS3	bombesin-like receptor 3
BRSK1	BR serine/threonine kinase 1
BRSK2	BR serine/threonine kinase 2
BTC	betacellulin
BTF3P11	basic transcription factor 3 pseudogene 11
BTG2	BTG family, member 2
BTN1A1	butyrophilin, subfamily 1, member A1
BTNL3	butyrophilin-like 3	*
BTNL8	butyrophilin-like 8	*
BTNL9	butyrophilin-like 9
C10orf120	chromosome 10 open reading frame 120
C10orf129	chromosome 10 open reading frame 129
C10orf53	chromosome 10 open reading frame 53
C10orf91	chromosome 10 open reading frame 91
C10orf99	chromosome 10 open reading frame 99
C11orf34	chromosome 11 open reading frame 34
C12orf36	chromosome 12 open reading frame 36
C12orf54	chromosome 12 open reading frame 54
C12orf69	chromosome 12 open reading frame 69
C14orf166B	chromosome 14 open reading frame 166B
C14orf177	chromosome 14 open reading frame 177
C14orf64	chromosome 14 open reading frame 64
C15orf32	chromosome 15 open reading frame 32
C15orf43	chromosome 15 open reading frame 43
C15orf60	chromosome 15 open reading frame 60
C15orf63	chromosome 15 open reading frame 63
C16orf78	chromosome 16 open reading frame 78
C16orf90	chromosome 16 open reading frame 90
C17orf66	chromosome 17 open reading frame 66
C17orf67	chromosome 17 open reading frame 67
C17orf77	chromosome 17 open reading frame 77	*
C18orf62	chromosome 18 open reading frame 62
C19orf18	chromosome 19 open reading frame 18
C19orf45	chromosome 19 open reading frame 45
C1QL4	complement component 1, q subcomponent-like 4
C1orf110	chromosome 1 open reading frame 110
C1orf111	chromosome 1 open reading frame 111
C1orf126	chromosome 1 open reading frame 126
C1orf141	chromosome 1 open reading frame 141
C1orf186	chromosome 1 open reading frame 186	*
C1orf198	chromosome 1 open reading frame 198
C1orf210	chromosome 1 open reading frame 210
C1orf226	chromosome 1 open reading frame 226	*
C1orf68	chromosome 1 open reading frame 68
C1orf87	chromosome 1 open reading frame 87
C20orf202	chromosome 20 open reading frame 202
C20orf79	chromosome 20 open reading frame 79
C21orf15	chromosome 21 open reading frame 15
C21orf54	chromosome 21 open reading frame 54
C22orf42	chromosome 22 open reading frame 42
C2orf27A	chromosome 2 open reading frame 27A	*
C2orf27B	chromosome 2 open reading frame 27B
C2orf66	chromosome 2 open reading frame 66
C2orf71	chromosome 2 open reading frame 71
C2orf78	chromosome 2 open reading frame 78
C2orf80	chromosome 2 open reading frame 80	*
C2orf88	chromosome 2 open reading frame 88	*
C2orf90	chromosome 2 open reading frame 90
C3P1	complement component 3 precursor pseudogene
C3orf32	chromosome 3 open reading frame 32	*
C3orf79	chromosome 3 open reading frame 79
C5orf64	chromosome 5 open reading frame 64
C6orf118	chromosome 6 open reading frame 118
C6orf123	chromosome 6 open reading frame 123
C7orf29	chromosome 7 open reading frame 29
C7orf34	chromosome 7 open reading frame 34
C7orf49	chromosome 7 open reading frame 49
C7orf62	chromosome 7 open reading frame 62
C7orf71	chromosome 7 open reading frame 71	*
C8A	complement component 8, alpha polypeptide	*
C8orf58	chromosome 8 open reading frame 58
C9orf11	chromosome 9 open reading frame 11
C9orf135	chromosome 9 open reading frame 135
C9orf152	chromosome 9 open reading frame 152
C9orf163	chromosome 9 open reading frame 163
C9orf24	chromosome 9 open reading frame 24
C9orf66	chromosome 9 open reading frame 66
CA1	carbonic anhydrase I
CA6	carbonic anhydrase VI
CABP4	calcium binding protein 4
CABP5	calcium binding protein 5
CABS1	calcium-binding protein, spermatid-specific 1
CACNB2	calcium channel, voltage-dependent, beta 2 subunit	*
CACNG1	calcium channel, voltage-dependent, gamma subunit 1
CACNG3	calcium channel, voltage-dependent, gamma subunit 3
CALCA	calcitonin-related polypeptide alpha
CALCR	calcitonin receptor
CALN1	calneuron 1
CAMK1G	calcium/calmodulin-dependent protein kinase IG
CAMP	cathelicidin antimicrobial peptide
CAPN13	calpain 13
CAPN14	calpain 14	*
CAPN6	calpain 6
CAPSL	calcyphosine-like	*
CARD14	caspase recruitment domain family, member 14
CARD18	caspase recruitment domain family, member 18
CARTPT	CART prepropeptide
CASP14	caspase 14, apoptosis-related cysteine peptidase	*
CASP9	caspase 9, apoptosis-related cysteine peptidase
CC2D2A	coiled-coil and C2 domain containing 2A
CCDC135	coiled-coil domain containing 135
CCDC164	coiled-coil domain containing 164
CCDC30	coiled-coil domain containing 30
CCDC33	coiled-coil domain containing 33
CCDC73	coiled-coil domain containing 73
CCL1	chemokine (C-C motif) ligand 1
CCL11	chemokine (C-C motif) ligand 11
CCL13	chemokine (C-C motif) ligand 13
CCL14	chemokine (C-C motif) ligand 14
CCL15	chemokine (C-C motif) ligand 15
CCL16	chemokine (C-C motif) ligand 16	*
CCL18	chemokine (C-C motif) ligand 18 (pulmonary and activation-regulated)
CCL20	chemokine (C-C motif) ligand 20
CCL21	chemokine (C-C motif) ligand 21
CCL23	chemokine (C-C motif) ligand 23	*
CCL28	chemokine (C-C motif) ligand 28
CCL3	chemokine (C-C motif) ligand 3	*
CCL3L1	chemokine (C-C motif) ligand 3-like 1	*
CCL3L3	chemokine (C-C motif) ligand 3-like 3	*
CCL4	chemokine (C-C motif) ligand 4
CCL4L1	chemokine (C-C motif) ligand 4-like 1
CCL4L2	chemokine (C-C motif) ligand 4-like 2
CCL5	chemokine (C-C motif) ligand 5
CCNB3	cyclin B3
CCR1	chemokine (C-C motif) receptor 1
CCR2	chemokine (C-C motif) receptor 2
CCR3	chemokine (C-C motif) receptor 3
CCR5	chemokine (C-C motif) receptor 5 (gene/pseudogene)	*
CCR6	chemokine (C-C motif) receptor 6	*
CCR9	chemokine (C-C motif) receptor 9	*
CCT8L1P	chaperonin containing TCP1, subunit 8 (theta)-like 1, pseudogene
CCT8L2	chaperonin containing TCP1, subunit 8 (theta)-like 2
CD177	CD177 molecule
CD1B	CD1b molecule
CD1E	CD1e molecule
CD200R1	CD200 receptor 1
CD22	CD22 molecule
CD226	CD226 molecule	*
CD244	CD244 molecule, natural killer cell receptor 2B4
CD300C	CD300c molecule	*
CD300E	CD300e molecule
CD300LB	CD300 molecule-like family member b
CD300LD	CD300 molecule-like family member d	*
CD33	CD33 molecule
CD3D	CD3d molecule, delta (CD3-TCR complex)
CD3E	CD3e molecule, epsilon (CD3-TCR complex)
CD3G	CD3g molecule, gamma (CD3-TCR complex)
CD4	CD4 molecule
CD48	CD48 molecule	*
CD52	CD52 molecule
CD53	CD53 molecule
CD5L	CD5 molecule-like
CD68	CD68 molecule
CD69	CD69 molecule
CD7	CD7 molecule
CD86	CD86 molecule
CDC7	cell division cycle 7 homolog (S. cerevisiae)
CDH15	cadherin 15, type 1, M-cadherin (myotubule)
CDH26	cadherin 26	*
CDH8	cadherin 8, type 2
CDKL5	cyclin-dependent kinase-like 5
CDRT15P1	CMT1A duplicated region transcript 15 pseudogene 1
CDRT4	CMT1A duplicated region transcript 4
CDX4	caudal type homeobox 4
CEACAM21	carcinoembryonic antigen-related cell adhesion molecule 21
CEACAM7	carcinoembryonic antigen-related cell adhesion molecule 7
CECR2	cat eye syndrome chromosome region, candidate 2	*
CELA2A	chymotrypsin-like elastase family, member 2A
CELA2B	chymotrypsin-like elastase family, member 2B
CELA3A	chymotrypsin-like elastase family, member 3A
CELA3B	chymotrypsin-like elastase family, member 3B
CENPI	centromere protein I
CER1	cerberus 1, cysteine knot superfamily, homolog (Xenopus laevis)
CERS4	ceramide synthase 4
CES3	carboxylesterase 3
CES5A	carboxylesterase 5A
CETN2	centrin, EF-hand protein, 2
CFC1	cripto, FRL-1, cryptic family 1	*
CFC1B	cripto, FRL-1, cryptic family 1B	*
CFHR1	complement factor H-related 1
CFHR2	complement factor H-related 2
CFHR5	complement factor H-related 5
CFI	complement factor I
CFTR	cystic fibrosis transmembrane conductance regulator (ATP-binding cassette sub-family C, member 7)
CHRNA1	cholinergic receptor, nicotinic, alpha 1 (muscle)
CHRNA10	cholinergic receptor, nicotinic, alpha 10 (neuronal)
CHST4	carbohydrate (N-acetylglucosamine 6-O) sulfotransferase 4
CHST8	carbohydrate (N-acetylgalactosamine 4-0) sulfotransferase 8
CIB3	calcium and integrin binding family member 3
CIB4	calcium and integrin binding family member 4	*
CLC	Charcot-Leyden crystal protein
CLCN1	chloride channel, voltage-sensitive 1
CLDN14	claudin 14	*
CLDN18	claudin 18
CLDN22	claudin 22
CLDN25	claudin 25	*
CLDN8	claudin 8
CLEC19A	C-type lectin domain family 19, member A
CLEC2A	C-type lectin domain family 2, member A
CLEC3A	C-type lectin domain family 3, member A
CLEC3B	C-type lectin domain family 3, member B
CLEC4D	C-type lectin domain family 4, member D
CLEC4M	C-type lectin domain family 4, member M
CLIC2	chloride intracellular channel 2
CLIC5	chloride intracellular channel 5
CLK3	CDC-like kinase 3	*
CLLU1OS	chronic lymphocytic leukemia up-regulated 1 opposite strand
CLNS1A	chloride channel, nucleotide-sensitive, 1A
CLPS	colipase, pancreatic
CLPSL1	colipase-like 1	*
CLRN1	clarin 1	*
CMA1	chymase 1, mast cell	*
CMAS	cytidine monophosphate N-acetylneuraminic acid synthetase
CMKLR1	chemokine-like receptor 1	*
CMTM5	CKLF-like MARVEL transmembrane domain containing 5
CNBD1	cyclic nucleotide binding domain containing 1
CNDP1	carnosine dipeptidase 1 (metallopeptidase M20 family)
CNGA1	cyclic nucleotide gated channel alpha 1
CNGA2	cyclic nucleotide gated channel alpha 2
CNGA4	cyclic nucleotide gated channel alpha 4
CNGB1	cyclic nucleotide gated channel beta 1
CNR1	cannabinoid receptor 1 (brain)	*
CNTN1	contactin 1
CNTN4	contactin 4
CNTNAP5	contactin associated protein-like 5
COL22A1	collagen, type XXII, alpha 1	*
COL4A6	collagen, type IV, alpha 6	*
COL9A1	collagen, type IX, alpha 1	*
CORO2A	coronin, actin binding protein, 2A
CPA3	carboxypeptidase A3 (mast cell)
CPA6	carboxypeptidase A6
CPB2	carboxypeptidase B2 (plasma)
CPNE1	copine I
CPNE6	copine VI (neuronal)
CRCT1	cysteine-rich C-terminal 1
CRISP1	cysteine-rich secretory protein 1	*
CRISP2	cysteine-rich secretory protein 2	*
CRISP3	cysteine-rich secretory protein 3	*
CRP	C-reactive protein, pentraxin-related
CRTAM	cytotoxic and regulatory T cell molecule
CRX	cone-rod homeobox	*
CRYBB1	crystallin, beta B1
CRYGA	crystallin, gamma A
CRYGB	crystallin, gamma B
CRYGC	crystallin, gamma C
CSAG1	chondrosarcoma associated gene 1	*
CSF2RA	colony stimulating factor 2 receptor, alpha, low-affinity (granulocyte-macrophage)
CSF3R	colony stimulating factor 3 receptor (granulocyte)
CSN1S2AP	casein alpha s2-like A, pseudogene
CSNK2A1P	casein kinase 2, alpha 1 polypeptide pseudogene
CST11	cystatin 11	*
CST3	cystatin C
CST9L	cystatin 9-like
CSTL1	cystatin-like 1
CT45A6	cancer/testis antigen family 45, member A6
CTAGE4	CTAGE family, member 4	*
CTAGE9	CTAGE family, member 9
CTDSPL	CTD (carboxy-terminal domain, RNA polymerase II, polypeptide A) small phosphatase-like
CTLA4	cytotoxic T-lymphocyte-associated protein 4
CTSE	cathepsin E
CTSG	cathepsin G
CTSH	cathepsin H
CTU2	cytosolic thiouridylase subunit 2 homolog (S. pombe)
CTXN3	cortexin 3	*
CXCL17	chemokine (C-X-C motif) ligand 17
CXCR1	chemokine (C-X-C motif) receptor 1
CXCR2	chemokine (C-X-C motif) receptor 2
CXorf22	chromosome X open reading frame 22
CXorf48	chromosome X open reading frame 48
CXorf51A	chromosome X open reading frame 51A
CXorf57	chromosome X open reading frame 57
CXorf61	chromosome X open reading frame 61
CXorf64	chromosome X open reading frame 64	*
CYFIP1	cytoplasmic FMR1 interacting protein 1
CYMP	chymosin pseudogene
CYP11B2	cytochrome P450, family 11, subfamily B, polypeptide 2	*
CYP17A1	cytochrome P450, family 17, subfamily A, polypeptide 1
CYP1A2	cytochrome P450, family 1, subfamily A, polypeptide 2
CYP2A13	cytochrome P450, family 2, subfamily A, polypeptide 13
CYP2A6	cytochrome P450, family 2, subfamily A, polypeptide 6
CYP2A7	cytochrome P450, family 2, subfamily A, polypeptide 7
CYP2B6	cytochrome P450, family 2, subfamily B, polypeptide 6
CYP2B7P1	cytochrome P450, family 2, subfamily B, polypeptide 7 pseudogene 1
CYP2C18	cytochrome P450, family 2, subfamily C, polypeptide 18
CYP2C19	cytochrome P450, family 2, subfamily C, polypeptide 19	*
CYP2C8	cytochrome P450, family 2, subfamily C, polypeptide 8	*
CYP2C9	cytochrome P450, family 2, subfamily C, polypeptide 9	*
CYP2F1	cytochrome P450, family 2, subfamily F, polypeptide 1
CYP3A4	cytochrome P450, family 3, subfamily A, polypeptide 4
CYP3A7	cytochrome P450, family 3, subfamily A, polypeptide 7
CYP4B1	cytochrome P450, family 4, subfamily B, polypeptide 1
CYP4F11	cytochrome P450, family 4, subfamily F, polypeptide 11	*
CYP4F12	cytochrome P450, family 4, subfamily F, polypeptide 12
CYP4F3	cytochrome P450, family 4, subfamily F, polypeptide 3	*
CYP4X1	cytochrome P450, family 4, subfamily X, polypeptide 1
CYP4Z1	cytochrome P450, family 4, subfamily Z, polypeptide 1
CYP4Z2P	cytochrome P450, family 4, subfamily Z, polypeptide 2 pseudogene
CYP8B1	cytochrome P450, family 8, subfamily B, polypeptide 1
CYSLTR1	cysteinyl leukotriene receptor 1	*
DACH2	dachshund homolog 2 (Drosophila)
DARC	Duffy blood group, chemokine receptor
DBC1	deleted in bladder cancer 1
DCC	deleted in colorectal carcinoma
DCD	dermcidin	*
DCHS2	dachsous 2 (Drosophila)	*
DCSTAMP	dendrocyte expressed seven transmembrane protein
DCX	doublecortin	*
DCXR	dicarbonyl/L-xylulose reductase
DDC	dopa decarboxylase (aromatic L-amino acid decarboxylase)	*
DDX4	DEAD (Asp-Glu-Ala-Asp) box polypeptide 4
DDX53	DEAD (Asp-Glu-Ala-Asp) box polypeptide 53
DEFA1	defensin, alpha 1
DEFA1B	defensin, alpha 1B
DEFA3	defensin, alpha 3, neutrophil-specific
DEFA4	defensin, alpha 4, corticostatin
DEFA5	defensin, alpha 5, Paneth cell-specific
DEFA6	defensin, alpha 6, Paneth cell-specific
DEFB1	defensin, beta 1
DEFB103A	defensin, beta 103A	*
DEFB103B	defensin, beta 103B	*
DEFB104A	defensin, beta 104A	*
DEFB104B	defensin, beta 104B	*
DEFB105A	defensin, beta 105A
DEFB105B	defensin, beta 105B
DEFB106A	defensin, beta 106A
DEFB106B	defensin, beta 106B
DEFB109P1	defensin, beta 109, pseudogene 1
DEFB109P1B	defensin, beta 109, pseudogene 1B	*
DEFB115	defensin, beta 115	*
DEFB116	defensin, beta 116
DEFB118	defensin, beta 118
DEFB119	defensin, beta 119	*
DEFB121	defensin, beta 121
DEFB123	defensin, beta 123
DEFB125	defensin, beta 125
DEFB126	defensin, beta 126
DEFB127	defensin, beta 127
DEFB128	defensin, beta 128
DEFB129	defensin, beta 129
DEFB130	defensin, beta 130	*
DEFB131	defensin, beta 131	*
DGCR6	DiGeorge syndrome critical region gene 6
DGKK	diacylglycerol kinase, kappa
DHRS7C	dehydrogenase/reductase (SDR family) member 7C	*
DHRS9	dehydrogenase/reductase (SDR family) member 9	*
DHRSX	dehydrogenase/reductase (SDR family) X-linked
DIO3OS	DIO3 opposite strand/antisense RNA
DIRAS3	DIRAS family, GTP-binding RAS-like 3	*
DLEC1	deleted in lung and esophageal cancer 1
DLG2	discs, large homolog 2 (Drosophila)	*
DLGAP2	discs, large (Drosophila) homolog-associated protein 2	*
DLGAP3	discs, large (Drosophila) homolog-associated protein 3
DLX5	distal-less homeobox 5
DLX6-AS1	DLX6 antisense RNA 1
DMBT1	deleted in malignant brain tumors 1	*
DMD	dystrophin	*
DMRTC1	DMRT-like family C1
DMRTC1B	DMRT-like family C1B
DMRTC2	DMRT-like family C2
DNAH12	dynein, axonemal, heavy chain 12
DNAH9	dynein, axonemal, heavy chain 9
DNAJB13	DnaJ (Hsp40) homolog, subfamily B, member 13
DNAJB8	DnaJ (Hsp40) homolog, subfamily B, member 8
DNASE1L3	deoxyribonuclease I-like 3	*
DNASE2B	deoxyribonuclease II beta
DNPEP	aspartyl aminopeptidase
DNTT	deoxynucleotidyltransferase, terminal
DOCK8	dedicator of cytokinesis 8
DPEP1	dipeptidase 1 (renal)
DPPA4	developmental pluripotency associated 4
DPY19L2P1	dpy-19-like 2 pseudogene 1 (C. elegans)
DSG1	desmoglein 1
DSG3	desmoglein 3
DTHD1	death domain containing 1
DTNA	dystrobrevin, alpha	*
DTX2	deltex homolog 2 (Drosophila)
DTX2P1-UPK3BP1-PMS2P11	DTX2P1-UPK3BP1-PMS2P11 readthrough (non-protein coding)
DUSP27	dual specificity phosphatase 27 (putative)
DYDC1	DPY30 domain containing 1
DYX1C1	dyslexia susceptibility 1 candidate 1
EBI3	Epstein-Barr virus induced 3
EDAR	ectodysplasin A receptor
EDDM3A	epididymal protein 3A
EDDM3B	epididymal protein 3B
EDNRB	endothelin receptor type B	*
EFCAB8	EF-hand calcium binding domain 8
EFS	embryonal Fyn-associated substrate	*
EFTUD1	elongation factor Tu GTP binding domain containing 1
EHF	ets homologous factor
EIF4EBP3	eukaryotic translation initiation factor 4E binding protein 3
ELAVL4	ELAV (embryonic lethal, abnormal vision, Drosophila)-like 4	*
ELMO1	engulfment and cell motility 1	*
EMR1	egf-like module containing, mucin-like, hormone receptor-like 1
EMR3	egf-like module containing, mucin-like, hormone receptor-like 3	*
ENPP5	ectonucleotide pyrophosphatase/phosphodiesterase 5 (putative)
ENPP6	ectonucleotide pyrophosphatase/phosphodiesterase 6
ENPP7	ectonucleotide pyrophosphatase/phosphodiesterase 7
ENTPD1	ectonucleoside triphosphate diphosphohydrolase 1
EPPIN	epididymal peptidase inhibitor
EPS8L3	EPS8-like 3
ERC2-IT1	ERC2 intronic transcript 1 (non-protein coding)
EREG	epiregulin
ERN2	endoplasmic reticulum to nucleus signaling 2
ERVFRD-1	endogenous retrovirus group FRD, member 1
ESPNP	espin pseudogene
ESR1	estrogen receptor 1	*
ESRG	embryonic stem cell related (non-protein coding)	*
ESRRB	estrogen-related receptor beta
ESRRG	estrogen-related receptor gamma	*
EXOC6	exocyst complex component 6
F11	coagulation factor XI
F13A1	coagulation factor XIII, A1 polypeptide	*
F13B	coagulation factor XIII, B polypeptide
FAAH	fatty acid amide hydrolase
FABP1	fatty acid binding protein 1, liver
FABP6	fatty acid binding protein 6, ileal
FABP7	fatty acid binding protein 7, brain
FAIM3	Fas apoptotic inhibitory molecule 3	*
FAM101A	family with sequence similarity 101, member A
FAM107B	family with sequence similarity 107, member B
FAM127A	family with sequence similarity 127, member A
FAM129B	family with sequence similarity 129, member B
FAM132A	family with sequence similarity 132, member A	*
FAM138A	family with sequence similarity 138, member A
FAM138B	family with sequence similarity 138, member B
FAM138C	family with sequence similarity 138, member C
FAM138D	family with sequence similarity 138, member D
FAM138E	family with sequence similarity 138, member E
FAM138F	family with sequence similarity 138, member F
FAM151A	family with sequence similarity 151, member A
FAM153B	family with sequence similarity 153, member B
FAM157A	family with sequence similarity 157, member A
FAM157B	family with sequence similarity 157, member B
FAM169B	family with sequence similarity 169, member B
FAM170A	family with sequence similarity 170, member A
FAM171A2	family with sequence similarity 171, member A2
FAM181A	family with sequence similarity 181, member A
FAM182B	family with sequence similarity 182, member B	*
FAM183B	acyloxyacyl hydrolase (neutrophil)
FAM190A	family with sequence similarity 190, member A
FAM195A	family with sequence similarity 195, member A
FAM205A	family with sequence similarity 205, member A
FAM205B	transmembrane protein C9orf144B pseudogene
FAM209A	family with sequence similarity 209, member A
FAM209B	family with sequence similarity 209, member B	*
FAM222A	family with sequence similarity 222, member A
FAM223A	family with sequence similarity 223, member A (non-protein coding)
FAM223B	family with sequence similarity 223, member B (non-protein coding)
FAM27B	family with sequence similarity 27, member B	*
FAM27L	family with sequence similarity 27-like	*
FAM41C	family with sequence similarity 41, member C
FAM5C	family with sequence similarity 5, member C
FAM65C	family with sequence similarity 65, member C
FAM70A	family with sequence similarity 70, member A
FAM71B	family with sequence similarity 71, member B
FAM75B	family with sequence similarity 75, member B
FAM75C1	family with sequence similarity 75, member C1	*
FAM75D1	family with sequence similarity 75, member D1
FAM75D3	family with sequence similarity 75, member D3
FAM75D4	family with sequence similarity 75, member D4
FAM75D5	FAM75-like protein FLJ46321 pseudogene
FAM89A	family with sequence similarity 89, member A
FAM95B1	family with sequence similarity 95, member B1
FAT2	FAT tumor suppressor homolog 2 (Drosophila)	*
FATE1	fetal and adult testis expressed 1
FBXO16	F-box protein 16
FBXO40	F-box protein 40
FBXW12	F-box and WD repeat domain containing 12	*
FCER1A	Fc fragment of IgE, high affinity I, receptor for; alpha polypeptide
FCER1G	Fc fragment of IgE, high affinity I, receptor for; gamma polypeptide
FCGR2B	Fc fragment of IgG, low affinity IIb, receptor (CD32)	*
FCGR2C	Fc fragment of IgG, low affinity IIc, receptor for (CD32) (gene/pseudogene)
FCN2	ficolin (collagen/fibrinogen domain containing lectin) 2 (hucolin)
FCRL1	Fc receptor-like 1
FCRL2	Fc receptor-like 2	*
FCRL3	Fc receptor-like 3
FCRL4	Fc receptor-like 4
FCRL5	Fc receptor-like 5
FERD3L	Fer3-like (Drosophila)
FETUB	fetuin B
FGA	fibrinogen alpha chain	*
FGD3	FYVE, RhoGEF and PH domain containing 3
FGD5	FYVE, RhoGEF and PH domain containing 5
FGF1	fibroblast growth factor 1 (acidic)
FGF13	fibroblast growth factor 13	*
FGF14	fibroblast growth factor 14
FGF23	fibroblast growth factor 23
FGF6	fibroblast growth factor 6	*
FGFBP1	fibroblast growth factor binding protein 1
FGFBP2	fibroblast growth factor binding protein 2
FGG	fibrinogen gamma chain
FILIP1L	filamin A interacting protein 1-like
FKSG2	tumor protein, translationally-controlled 1 pseudogene
FKSG29	FKSG29
FLG	filaggrin	*
FLJ25758	MAP/microtubule affinity-regulating kinase 1 pseudogene
FLJ46361	deleted in malignant brain tumors 1 pseudogene
FLRT1	fibronectin leucine rich transmembrane protein 1
FMO6P	flavin containing monooxygenase 6 pseudogene
FMO9P	flavin containing monooxygenase 9 pseudogene	*
FMR1NB	fragile X mental retardation 1 neighbor
FOLH1B	folate hydrolase 1B
FOXA3	forkhead box A3
FOXD4L3	forkhead box D4-like 3
FOXN3-AS2	FOXN3 antisense RNA 2
FOXP2	forkhead box P2
FOXR2	forkhead box R2
FREM1	FRAS1 related extracellular matrix 1
FREM2	FRAS1 related extracellular matrix protein 2
FRG2	FSHD region gene 2	*
FRG2B	FSHD region gene 2 family, member B
FRG2C	FSHD region gene 2 family, member C
FRMD1	FERM domain containing 1	*
FRMPD2	FERM and PDZ domain containing 2	*
FRMPD2P1	FERM and PDZ domain containing 2 pseudogene 1	*
FRMPDP2	FERM and PDZ domain containing 2 pseudogene 2	*
FSHB	follicle stimulating hormone, beta polypeptide
FSHR	follicle stimulating hormone receptor
FUNDC2P2	FUN14 domain containing 2 pseudogene 2
FUT3	fucosyltransferase 3 (galactoside 3(4)-L-fucosyltransferase, Lewis blood group)	*
FXYD2	FXYD domain containing ion transport regulator 2	*
FXYD6	FXYD domain containing ion transport regulator 6	*
GAB2	GRB2-associated binding protein 2
GAB4	GRB2-associated binding protein family, member 4
GABRA1	gamma-aminobutyric acid (GABA) A receptor, alpha 1	*
GABRA3	gamma-aminobutyric acid (GABA) A receptor, alpha 3
GABRA4	gamma-aminobutyric acid (GABA) A receptor, alpha 4	*
GABRA6	gamma-aminobutyric acid (GABA) A receptor, alpha 6
GABRB1	gamma-aminobutyric acid (GABA) A receptor, beta 1
GABRG1	gamma-aminobutyric acid (GABA) A receptor, gamma 1
GABRG2	gamma-aminobutyric acid (GABA) A receptor, gamma 2
GABRP	gamma-aminobutyric acid (GABA) A receptor, pi
GABRR1	gamma-aminobutyric acid (GABA) A receptor, rho 1	*
GAD1	glutamate decarboxylase 1 (brain, 67kDa)
GALNT8	UDP-N-acetyl-alpha-D-galactosamine:polypeptide N-acetylgalactosaminyltransferase 8 (GalNAc-T8)
GALP	galanin-like peptide
GAS6	growth arrest-specific 6	*
GAS7	growth arrest-specific 7	*
GATA1	GATA binding protein 1 (globin transcription factor 1)	*
GATSL1	GATS protein-like 1
GATSL2	GATS protein-like 2
GBA3	glucosidase, beta, acid 3 (cytosolic)
GBP1P1	guanylate binding protein 1, interferon-inducible pseudogene 1	*
GBP5	guanylate binding protein 5
GCNT2	glucosaminyl (N-acetyl) transferase 2, I-branching enzyme (I blood group)	*
GCNT4	glucosaminyl (N-acetyl) transferase 4, core 2
GCNT7	glucosaminyl (N-acetyl) transferase family member 7
GCSAM	germinal center-associated, signaling and motility	*
GDA	guanine deaminase
GDPGP1	GDP-D-glucose phosphorylase 1
GFRAL	GDNF family receptor alpha like
GGT3P	gamma-glutamyltransferase 3 pseudogene
GGT8P	gamma-glutamyltransferase 8 pseudogene
GGTLC1	gamma-glutamyltransferase light chain 1	*
GGTLC2	gamma-glutamyltransferase light chain 2
GHRHR	growth hormone releasing hormone receptor
GHSR	growth hormone secretagogue receptor
GIF	gastric intrinsic factor (vitamin B synthesis)
GIMAP1	GTPase, IMAP family member 1	*
GIMAP2	GTPase, IMAP family member 2
GIMAP4	GTPase, IMAP family member 4
GIMAP5	GTPase, IMAP family member 5
GIMAP6	GTPase, IMAP family member 6
GIMAP7	GTPase, IMAP family member 7
GINS3	GINS complex subunit 3 (Psf3 homolog)
GJA5	gap junction protein, alpha 5, 40kDa
GJA8	gap junction protein, alpha 8, 50kDa
GJC3	gap junction protein, gamma 3, 30.2kDa
GK2	glycerol kinase 2
GLI2	GLI family zinc finger 2
GLP2R	glucagon-like peptide 2 receptor	*
GLRX3	glutaredoxin 3
GLYAT	glycine-N-acyltransferase
GLYCAM1	glycosylation dependent cell adhesion molecule 1 (pseudogene)
GML	glycosylphosphatidylinositol anchored molecule like protein
GNG12	guanine nucleotide binding protein (G protein), gamma 12
GNRHR	gonadotropin-releasing hormone receptor
GOLGA2P2Y	golgin A2 pseudogene 2, Y-linked
GOLGA2P3Y	golgin A2 pseudogene 3, Y-linked
GOLGA2P5	golgin A2 pseudogene 5
GP2	glycoprotein 2 (zymogen granule membrane)
GP6	glycoprotein VI (platelet)
GPHA2	glycoprotein hormone alpha 2
GPHB5	glycoprotein hormone beta 5	*
GPLD1	glycosylphosphatidylinositol specific phospholipase D1	*
GPM6A	glycoprotein M6A
GPM6B	glycoprotein M6B	*
GPR101	G protein-coupled receptor 101
GPR112	G protein-coupled receptor 112
GPR115	G protein-coupled receptor 115
GPR116	G protein-coupled receptor 116	*
GPR119	G protein-coupled receptor 119	*
GPR128	G protein-coupled receptor 128
GPR141	G protein-coupled receptor 141
GPR149	G protein-coupled receptor 149
GPR151	G protein-coupled receptor 151
GPR174	G protein-coupled receptor 174
GPR21	G protein-coupled receptor 21
GPR31	G protein-coupled receptor 31
GPR37L1	G protein-coupled receptor 37 like 1
GPR89C	G protein-coupled receptor 89C
GPX5	glutathione peroxidase 5 (epididymal androgen-related protein)
GPX6	glutathione peroxidase 6 (olfactory)
GRB10	growth factor receptor-bound protein 10
GREB1	growth regulation by estrogen in breast cancer 1
GRIK1-AS1	GRIK1 antisense RNA 1	*
GRIK5	glutamate receptor, ionotropic, kainate 5
GRIN2B	glutamate receptor, ionotropic, N-methyl D-aspartate 2B	*
GRIN2D	glutamate receptor, ionotropic, N-methyl D-aspartate 2D
GRIP2	glutamate receptor interacting protein 2
GRK1	G protein-coupled receptor kinase 1
GRN	granulin
GRXCR1	glutaredoxin, cysteine rich 1
GRXCR2	glutaredoxin, cysteine rich 2
GSTA3	glutathione S-transferase alpha 3
GSTM5P1	glutathione S-transferase mu 5 pseudogene 1
GTF2H2	general transcription factor IIH, polypeptide 2, 44kDa
GTF2H2B	general transcription factor IIH, polypeptide 2B (pseudogene)	*
GTF2H2C	general transcription factor IIH, polypeptide 2C
GTF2H2D	general transcription factor IIH, polypeptide 2D	*
GTF2IP1	general transcription factor IIi, pseudogene 1
GTSF1L	gametocyte specific factor 1-like	*
GUCA1C	guanylate cyclase activator 1C
GUCA2B	guanylate cyclase activator 2B (uroguanylin)
GUCY2EP	guanylate cyclase 2E, pseudogene
GVINP1	GTPase, very large interferon inducible pseudogene 1
GZMB	granzyme B (granzyme 2, cytotoxic T-lymphocyte-associated serine esterase 1)
GZMH	granzyme H (cathepsin G-like 2, protein h-CCPX)	*
H2AFY	H2A histone family, member Y	*
H2BFXP	H2B histone family, member X, pseudogene	*
H3F3C	H3 histone, family 3C
HABP2	hyaluronan binding protein 2
HAL	histidine ammonia-lyase
HAVCR1P1	hepatitis A virus cellular receptor 1 pseudogene 1
HBBP1	hemoglobin, beta pseudogene 1	*
HCG26	HLA complex group 26 (non-protein coding)
HCG4	HLA complex group 4 (non-protein coding)
HCLS1	hematopoietic cell-specific Lyn substrate 1
HCRTR2	hypocretin (orexin) receptor 2
HDC	histidine decarboxylase
HEPHL1	hephaestin-like 1
HERC2P4	hect domain and RLD 2 pseudogene 4
HERPUD1	homocysteine-inducible, endoplasmic reticulum stress-inducible, ubiquitin-like domain member 1	*
HERPUD2	HERPUD family member 2
HHIPL2	HHIP-like 2
HHLA1	HERV-H LTR-associating 1
HIPK4	homeodomain interacting protein kinase 4
HIST1H2AA	histone cluster 1, H2aa	*
HIST1H2BA	histone cluster 1, H2ba
HLA-DMA	major histocompatibility complex, class II, DM alpha
HLA-DPA1	major histocompatibility complex, class II, DP alpha 1
HLA-DQA1	major histocompatibility complex, class II, DQ alpha 1
HLA-DQA2	major histocompatibility complex, class II, DQ alpha 2
HLA-DQB2	major histocompatibility complex, class II, DQ beta 2	*
HLA-DRA	major histocompatibility complex, class II, DR alpha
HLA-DRB5	major histocompatibility complex, class II, DR beta 5
HLA-DRB6	major histocompatibility complex, class II, DR beta 6 (pseudogene)
HMGCLL1	3-hydroxymethyl-3-methylglutaryl-CoA lyase-like 1
HMGCS2	3-hydroxy-3-methylglutaryl-CoA synthase 2 (mitochondrial)
HMGN5	high mobility group nucleosome binding domain 5	*
HMHB1	histocompatibility (minor) HB-1
HMP19	HMP19 protein
HNF4A	hepatocyte nuclear factor 4, alpha
HNRNPCL1	heterogeneous nuclear ribonucleoprotein C-like 1
HP	haptoglobin
HPR	haptoglobin-related protein
HPS4	Hermansky-Pudlak syndrome 4
HPVC1	human papillomavirus (type 18) E5 central sequence-like 1
HPX	hemopexin
HPYR1	Helicobacter pylori responsive 1 (non-protein coding)
HRC	histidine rich calcium binding protein
HRG	histidine-rich glycoprotein
HRH2	histamine receptor H2
HS6ST2	heparan sulfate 6-O-sulfotransferase 2	*
HSD17B2	hydroxysteroid (17-beta) dehydrogenase 2
HSD17B7P2	hydroxysteroid (17-beta) dehydrogenase 7 pseudogene 2
HSD3B1	hydroxy-delta-5-steroid dehydrogenase, 3 beta- and steroid delta-isomerase 1
HSH2D	hematopoietic SH2 domain containing
HTN1	histatin 1	*
HTR3A	5-hydroxytryptamine (serotonin) receptor 3A, ionotropic	*
HTR3E	5-hydroxytryptamine (serotonin) receptor 3E, ionotropic
HULC	highly up-regulated in liver cancer (non-protein coding)	*
HYAL4	hyaluronoglucosaminidase 4
HYDIN	HYDIN, axonemal central pair apparatus protein
IAPP	islet amyloid polypeptide
IFFO2	intermediate filament family orphan 2
IFITM4P	interferon induced transmembrane protein 4 pseudogene
IFNW1	interferon, omega 1
IGBP1P1	immunoglobulin (CD79A) binding protein 1 pseudogene 1
IGFALS	insulin-like growth factor binding protein, acid labile subunit	*
IGFL1	IGF-like family member 1
IGFL2	IGF-like family member 2
IGFL3	IGF-like family member 3
IGFL4	IGF-like family member 4
IGLL3P	immunoglobulin lambda-like polypeptide 3, pseudogene
IGSF22	immunoglobulin superfamily, member 22
IGSF6	immunoglobulin superfamily, member 6
IL12B	interleukin 12B (natural killer cell stimulatory factor 2, cytotoxic lymphocyte maturation factor 2, p40)
IL16	interleukin 16	*
IL17A	interleukin 17A
IL17F	interleukin 17F	*
IL18RAP	interleukin 18 receptor accessory protein
IL19	interleukin 19
IL1F10	interleukin 1 family, member 10 (theta)	*
IL1R1	interleukin 1 receptor, type I
IL1R2	interleukin 1 receptor, type II
IL2RA	interleukin 2 receptor, alpha
IL2RG	interleukin 2 receptor, gamma
IL3	interleukin 3 (colony-stimulating factor, multiple)
IL36A	interleukin 36, alpha
IL37	interleukin 37	*
IL5RA	interleukin 5 receptor, alpha
IL7	interleukin 7
IMPG1	interphotoreceptor matrix proteoglycan 1
INE2	inactivation escape 2 (non-protein coding)
INSL4	insulin-like 4 (placenta)
IP6K2	inositol hexakisphosphate kinase 2
IPW	imprinted in Prader-Willi syndrome (non-protein coding)
IQCF3	IQ motif containing F3	*
IQCF5	IQ motif containing F5
IQCF6	IQ motif containing F6
IQSEC3	IQ motif and Sec7 domain 3
ISM1	isthmin 1 homolog (zebrafish)	*
ISX	intestine-specific homeobox	*
ITGA2B	integrin, alpha 2b (platelet glycoprotein IIb of IIb/IIIa complex, antigen CD41)	*
ITGAD	integrin, alpha D	*
ITIH2	inter-alpha-trypsin inhibitor heavy chain 2
ITIH6	inter-alpha-trypsin inhibitor heavy chain family, member 6
JAKMIP2	janus kinase and microtubule interacting protein 2
KAAG1	kidney associated antigen 1
KALRN	kalirin, RhoGEF kinase	*
KCNAB1	potassium voltage-gated channel, shaker-related subfamily, beta member 1	*
KCNAB2	potassium voltage-gated channel, shaker-related subfamily, beta member 2
KCNH5	potassium voltage-gated channel, subfamily H (eag-related), member 5	*
KCNH7	potassium voltage-gated channel, subfamily H (eag-related), member 7
KCNIP1	Kv channel interacting protein 1	*
KCNIP4	Kv channel interacting protein 4	*
KCNJ11	potassium inwardly-rectifying channel, subfamily J, member 11
KCNK10	potassium channel, subfamily K, member 10
KCNK18	potassium channel, subfamily K, member 18
KCNMB1	potassium large conductance calcium-activated channel, subfamily M, beta member 1	*
KCNMB2	potassium large conductance calcium-activated channel, subfamily M, beta member 2	*
KCNMB3	potassium large conductance calcium-activated channel, subfamily M beta member 3
KCNN3	potassium intermediate/small conductance calcium-activated channel, subfamily N, member 3
KCNT2	potassium channel, subfamily T, member 2
KCTD1	potassium channel tetramerisation domain containing 1
KDELR1	KDEL (Lys-Asp-Glu-Leu) endoplasmic reticulum protein retention receptor 1	*
KEL	Kell blood group, metallo-endopeptidase
KHDC1L	KH homology domain containing 1-like
KIAA0087	KIAA0087
KIAA0125	KIAA0125
KIAA1210	KIAA1210	*
KIAA1211	KIAA1211
KIAA1257	KIAA1257
KIAA1462	KIAA1462
KIAA1549	KIAA1549
KIF2B	kinesin family member 2B
KIR2DL4	killer cell immunoglobulin-like receptor, two domains, long cytoplasmic tail, 4	*
KIR2DS1	killer cell immunoglobulin-like receptor, two domains, short cytoplasmic tail, 1
KIR2DS4	killer cell immunoglobulin-like receptor, two domains, short cytoplasmic tail, 4
KIR3DL2	killer cell immunoglobulin-like receptor, three domains, long cytoplasmic tail, 2	*
KIR3DL3	killer cell immunoglobulin-like receptor, three domains, long cytoplasmic tail, 3
KLF8	Kruppel-like factor 8	*
KLHDC7A	kelch domain containing 7A
KLHL26	kelch-like 26 (Drosophila)
KLHL6	kelch-like 6 (Drosophila)
KLK11	kallikrein-related peptidase 11	*
KLK14	kallikrein-related peptidase 14	*
KLK15	kallikrein-related peptidase 15
KLK2	kallikrein-related peptidase 2
KLK3	kallikrein-related peptidase 3	*
KLK5	kallikrein-related peptidase 5
KLK6	kallikrein-related peptidase 6	*
KLK7	kallikrein-related peptidase 7	*
KLK8	kallikrein-related peptidase 8
KLK9	kallikrein-related peptidase 9	*
KLKP1	kallikrein pseudogene 1
KLRAP1	killer cell lectin-like receptor subfamily A pseudogene 1
KLRB1	killer cell lectin-like receptor subfamily B, member 1
KLRC1	killer cell lectin-like receptor subfamily C, member 1
KLRD1	killer cell lectin-like receptor subfamily D, member 1	*
KLRG1	killer cell lectin-like receptor subfamily G, member 1
KNG1	kininogen 1	*
KRT1	keratin 1	*
KRT13	keratin 13
KRT14	keratin 14
KRT17	keratin 17	*
KRT27	keratin 27
KRT35	keratin 35
KRT71	keratin 71
KRTAP10-1	keratin associated protein 10-1	*
KRTAP10-10	keratin associated protein 10-10	*
KRTAP10-12	keratin associated protein 10-12
KRTAP10-3	keratin associated protein 10-3
KRTAP10-4	keratin associated protein 10-4
KRTAP10-6	keratin associated protein 10-6	*
KRTAP10-7	keratin associated protein 10-7
KRTAP10-8	keratin associated protein 10-8
KRTAP11-1	keratin associated protein 11-1
KRTAP12-1	keratin associated protein 12-1
KRTAP12-3	keratin associated protein 12-3
KRTAP12-4	keratin associated protein 12-4	*
KRTAP13-1	keratin associated protein 13-1
KRTAP13-2	keratin associated protein 13-2	*
KRTAP13-3	keratin associated protein 13-3
KRTAP15-1	keratin associated protein 15-1
KRTAP19-1	keratin associated protein 19-1
KRTAP19-2	keratin associated protein 19-2
KRTAP19-4	keratin associated protein 19-4
KRTAP19-5	keratin associated protein 19-5
KRTAP19-8	keratin associated protein 19-8
KRTAP20-3	keratin associated protein 20-3
KRTAP21-1	keratin associated protein 21-1
KRTAP23-1	keratin associated protein 23-1
KRTAP24-1	keratin associated protein 24-1	*
KRTAP25-1	keratin associated protein 25-1
KRTAP27-1	keratin associated protein 27-1
KRTAP5-1	keratin associated protein 5-1
KRTAP5-10	keratin associated protein 5-10
KRTAP5-2	keratin associated protein 5-2
KRTAP5-3	keratin associated protein 5-3
KRTAP5-6	keratin associated protein 5-6
KRTAP5-7	keratin associated protein 5-7	*
KRTAP5-8	keratin associated protein 5-8	*
KRTAP5-9	keratin associated protein 5-9
KRTAP9-2	keratin associated protein 9-2
KRTAP9-4	keratin associated protein 9-4
KRTAP9-8	keratin associated protein 9-8
KRTDAP	keratinocyte differentiation-associated protein
KYNU	kynureninase	*
LACC1	laccase (multicopper oxidoreductase) domain containing 1	*
LACRT	lacritin
LAIR1	leukocyte-associated immunoglobulin-like receptor 1
LAIR2	leukocyte-associated immunoglobulin-like receptor 2
LALBA	lactalbumin, alpha-
LAMTOR2	late endosomal/lysosomal adaptor, MAPK and MTOR activator 2
LAP3	leucine aminopeptidase 3
LARP1	La ribonucleoprotein domain family, member 1
LAX1	lymphocyte transmembrane adaptor 1
LCE1A	late cornified envelope 1A
LCE1C	late cornified envelope 1C
LCE1D	late cornified envelope 1D	*
LCE1E	late cornified envelope 1E
LCE1F	late cornified envelope 1F
LCE2B	late cornified envelope 2B	*
LCE3A	late cornified envelope 3A
LCE3B	late cornified envelope 3B
LCE3C	late cornified envelope 3C	*
LCE3E	late cornified envelope 3E
LCE4A	late cornified envelope 4A
LCE6A	late cornified envelope 6A
LCN1	lipocalin 1	*
LCP1	lymphocyte cytosolic protein 1 (L-plastin)
LECT1	leukocyte cell derived chemotaxin 1
LELP1	late cornified envelope-like proline-rich 1
LEPREL2	leprecan-like 2
LEUTX	leucine twenty homeobox
LGALS13	lectin, galactoside-binding, soluble, 13
LGALS14	lectin, galactoside-binding, soluble, 14
LGALS17A	Charcot-Leyden crystal protein pseudogene	*
LGALS8	lectin, galactoside-binding, soluble, 8	*
LGALS9	lectin, galactoside-binding, soluble, 9
LGALS9B	lectin, galactoside-binding, soluble, 9B
LGALS9C	lectin, galactoside-binding, soluble, 9C
LGI1	leucine-rich, glioma inactivated 1	*
LGR6	leucine-rich repeat containing G protein-coupled receptor 6
LHX8	LIM homeobox 8
LILRA1	leukocyte immunoglobulin-like receptor, subfamily A (with TM domain), member 1
LILRA3	leukocyte immunoglobulin-like receptor, subfamily A (without TM domain), member 3
LILRA5	leukocyte immunoglobulin-like receptor, subfamily A (with TM domain), member 5
LILRB1	leukocyte immunoglobulin-like receptor, subfamily B (with TM and ITIM domains), member 1
LILRB2	leukocyte immunoglobulin-like receptor, subfamily B (with TM and ITIM domains), member 2
LILRB3	leukocyte immunoglobulin-like receptor, subfamily B (with TM and ITIM domains), member 3	*
LILRB5	leukocyte immunoglobulin-like receptor, subfamily B (with TM and ITIM domains), member 5	*
LILRP2	leukocyte immunoglobulin-like receptor pseudogene 2	*
LIM2	lens intrinsic membrane protein 2, 19kDa	*
LINC00052	long intergenic non-protein coding RNA 52
LINC00094	long intergenic non-protein coding RNA 94
LINC00238	long intergenic non-protein coding RNA 238	*
LINC00264	long intergenic non-protein coding RNA 264
LINC00293	long intergenic non-protein coding RNA 293
LINC00294	long intergenic non-protein coding RNA 294
LINC00305	long intergenic non-protein coding RNA 305	*
LINC00312	long intergenic non-protein coding RNA 312
LINC00323	long intergenic non-protein coding RNA 323
LINC00326	long intergenic non-protein coding RNA 326
LINC00341	long intergenic non-protein coding RNA 341
LINC00410	long intergenic non-protein coding RNA 410
LINC00442	long intergenic non-protein coding RNA 442
LINC00469	long intergenic non-protein coding RNA 469	*
LINC00520	long intergenic non-protein coding RNA 520
LINC00575	long intergenic non-protein coding RNA 575
LINC00593	long intergenic non-protein coding RNA 593
LINC00598	long intergenic non-protein coding RNA 598
LINC00643	long intergenic non-protein coding RNA 643
LINC00661	long intergenic non-protein coding RNA 661
LINC00669	long intergenic non-protein coding RNA 669
LMF2	lipase maturation factor 2
LMO2	LIM domain only 2 (rhombotin-like 1)
LMOD2	leiomodin 2 (cardiac)
LMX1A	LIM homeobox transcription factor 1, alpha
LNX1	ligand of numb-protein X 1, E3 ubiquitin protein ligase
LOC100093631	general transcription factor II, i, pseudogene
LOC100124692	maltase-glucoamylase (alpha-glucosidase) pseudogene
LOC100129935	lectin, galactoside-binding, soluble, 14 pseudogene
LOC100130264	uncharacterized LOC100130264
LOC100130331	POTE ankyrin domain family, member F pseudogene
LOC100133050	glucuronidase, beta pseudogene
LOC100133308	Ras suppressor protein 1 pseudogene
LOC100133920	uncharacterized LOC100133920
LOC100144604	uncharacterized LOC100144604
LOC100169752	uncharacterized LOC100169752
LOC100240734	uncharacterized LOC100240734
LOC100271832	uncharacterized LOC100271832
LOC144742	uncharacterized LOC144742	*
LOC145837	uncharacterized LOC145837	*
LOC150568	uncharacterized LOC150568
LOC154449	uncharacterized LOC154449	*
LOC158696	uncharacterized LOC158696
LOC221122	uncharacterized LOC221122	*
LOC254312	uncharacterized LOC254312
LOC283663	uncharacterized LOC283663
LOC283761	uncharacterized LOC283761
LOC283867	uncharacterized LOC283867
LOC283914	uncharacterized LOC283914
LOC284661	uncharacterized LOC284661
LOC284688	uncharacterized LOC284688
LOC285401	uncharacterized LOC285401
LOC285692	uncharacterized LOC285692
LOC285768	uncharacterized LOC285768
LOC286094	uncharacterized LOC286094
LOC286135	uncharacterized LOC286135
LOC286359	uncharacterized LOC286359
LOC339535	uncharacterized LOC339535
LOC339568	uncharacterized LOC339568
LOC340074	uncharacterized LOC340074
LOC340094	uncharacterized LOC340094
LOC340357	uncharacterized LOC340357
LOC388692	uncharacterized LOC388692
LOC389634	uncharacterized LOC389634
LOC392196	ubiquitin specific peptidase 17-like 2 pseudogene
LOC399744	uncharacterized LOC399744
LOC400794	uncharacterized LOC400794	*
LOC400940	uncharacterized LOC400940	*
LOC402644	peptidylprolyl isomerase A (cyclophilin A) pseudogene
LOC415056	uncharacterized LOC415056
LOC440040	glutamate receptor, metabotropic 5 pseudogene
LOC440563	heterogeneous nuclear ribonucleoprotein C-like
LOC440905	uncharacterized LOC440905
LOC441956	uncharacterized LOC441956
LOC442459	X-ray repair complementing defective repair pseudogene
LOC494141	mitochondrial carrier triple repeat 1 pseudogene
LOC541473	FK506 binding protein 6, 36kDa pseudogene	*
LOC642852	uncharacterized LOC642852
LOC642929	general transcription factor II, i pseudogene
LOC643955	zinc finger protein 479 pseudogene
LOC644145	exocyst complex component 1 pseudogene
LOC646214	p21 protein (Cdc42/Rac)-activated kinase 2 pseudogene
LOC649330	heterogeneous nuclear ribonucleoprotein C-like
LOC727677	uncharacterized LOC727677	*
LOC727896	cysteine and histidine-rich domain (CHORD) containing 1 pseudogene
LOC727924	uncharacterized LOC727924
LOC728024	chromosome X open reading frame 56 pseudogene	*
LOC728606	uncharacterized LOC728606
LOC729678	uncharacterized LOC729678
LOC732275	uncharacterized LOC732275
LOC84856	uncharacterized LOC84856
LOC93432	maltase-glucoamylase (alpha-glucosidase) pseudogene
LOXHD1	lipoxygenase homology domains 1	*
LPA	lipoprotein, Lp(a)
LPPR1	lipid phosphate phosphatase-related protein type 1	*
LPPR4	lipid phosphate phosphatase-related protein type 4
LRMP	lymphoid-restricted membrane protein
LRP5L	low density lipoprotein receptor-related protein 5-like	*
LRRC10	leucine rich repeat containing 10
LRRC18	leucine rich repeat containing 18
LRRC2	leucine rich repeat containing 2	*
LRRC31	leucine rich repeat containing 31
LRRC37A	leucine rich repeat containing 37A
LRRC37A2	leucine rich repeat containing 37, member A2
LRRC37A4P	leucine rich repeat containing 37, member A4, pseudogene
LRRC37B	leucine rich repeat containing 37B
LRRC55	leucine rich repeat containing 55	*
LRRC69	leucine rich repeat containing 69	*
LRRC8B	leucine rich repeat containing 8 family, member B
LRTM1	leucine-rich repeats and transmembrane domains 1
LSAMP	limbic system-associated membrane protein
LY6E	lymphocyte antigen 6 complex, locus E
LY6G5B	lymphocyte antigen 6 complex, locus G5B
LY86	lymphocyte antigen 86
LY86-AS1	LY86 antisense RNA 1
LYG1	lysozyme G-like 1
LYPD2	LY6/PLAUR domain containing 2
LYZL4	lysozyme-like 4
LYZL6	lysozyme-like 6
MAB21L1	mab-21-like 1 (C. elegans)
MAB21L3	mab-21-like 3 (C. elegans)
MAGEA11	melanoma antigen family A, 11
MAGEA12	melanoma antigen family A, 12
MAGEA2	melanoma antigen family A, 2
MAGEA3	melanoma antigen family A, 3
MAGEA6	melanoma antigen family A, 6
MAGEA9	melanoma antigen family A, 9
MAGEA9B	melanoma antigen family A, 9B
MAGEB18	melanoma antigen family B, 18
MAGEB3	melanoma antigen family B, 3
MAGEB4	melanoma antigen family B, 4
MAGEB6	melanoma antigen family B, 6
MAGEC2	melanoma antigen family C, 2
MAGEE2	melanoma antigen family E, 2
MAGEH1	melanoma antigen family H, 1
MAMDC2	MAM domain containing 2
MAP2K6	mitogen-activated protein kinase kinase 6
MAPK10	mitogen-activated protein kinase 10	*
MARCH1	membrane-associated ring finger (C3HC4) 1, E3 ubiquitin protein ligase
MARK2	MAP/microtubule affinity-regulating kinase 2
MAS1L	MAS1 oncogene-like
MATN1	matrilin 1, cartilage matrix protein
MAZ	MYC-associated zinc finger protein (purine-binding transcription factor)
MBD3L2	methyl-CpG binding domain protein 3-like 2
MBD3L5	methyl-CpG binding domain protein 3-like 5
MBL2	mannose-binding lectin (protein C) 2, soluble	*
MBP	myelin basic protein
MC2R	melanocortin 2 receptor (adrenocorticotropic hormone)
MC3R	melanocortin 3 receptor
MCTP2	multiple C2 domains, transmembrane 2	*
MEG8	maternally expressed 8 (non-protein coding)	*
MEP1B	meprin A, beta
MEX3D	mex-3 homolog D (C. elegans)
MGAM	maltase-glucoamylase (alpha-glucosidase)
MGAT5	mannosyl (alpha-1,6-)-glycoprotein beta-1,6-N-acetyl-glucosaminyltransferase
MGP	matrix Gla protein
MIA3	melanoma inhibitory activity family, member 3
MID1	midline 1 (Opitz/BBB syndrome)
MINK1	misshapen-like kinase 1
MIR600HG	MIR600 host gene (non-protein coding)
MLC1	megalencephalic leukoencephalopathy with subcortical cysts 1	*
MLLT4-AS1	MLLT4 antisense RNA 1
MLN	motilin
MMP26	matrix metallopeptidase 26
MMP9	matrix metallopeptidase 9 (gelatinase B, 92kDa gelatinase, 92kDa type IV collagenase)
MNDA	myeloid cell nuclear differentiation antigen	*
MOBP	myelin-associated oligodendrocyte basic protein
MOG	myelin oligodendrocyte glycoprotein
MORF4	mortality factor 4	*
MOXD2P	monooxygenase, DBH-like 2, pseudogene
MPEG1	macrophage expressed 1
MPL	myeloproliferative leukemia virus oncogene
MPP7	membrane protein, palmitoylated 7 (MAGUK p55 subfamily member 7)
MPPED2	metallophosphoesterase domain containing 2
MPZL2	myelin protein zero-like 2	*
MRGPRX1	MAS-related GPR, member X1
MRGPRX2	MAS-related GPR, member X2
MRGPRX4	MAS-related GPR, member X4
MS4A1	membrane-spanning 4-domains, subfamily A, member 1
MS4A3	membrane-spanning 4-domains, subfamily A, member 3 (hematopoietic cell-specific)
MS4A4A	membrane-spanning 4-domains, subfamily A, member 4A	*
MS4A5	membrane-spanning 4-domains, subfamily A, member 5	*
MS4A6A	membrane-spanning 4-domains, subfamily A, member 6A
MS4A6E	membrane-spanning 4-domains, subfamily A, member 6E
MS4A7	membrane-spanning 4-domains, subfamily A, member 7
MS4A8B	membrane-spanning 4-domains, subfamily A, member 8B
MSGN1	mesogenin 1
MSL2	male-specific lethal 2 homolog (Drosophila)	*
MSMB	microseminoprotein, beta-
MST1P9	macrophage stimulating 1 (hepatocyte growth factor-like) pseudogene 9
MSX2P1	msh homeobox 2 pseudogene 1
MT1B	metallothionein 1B
MT4	metallothionein 4
MTMR8	myotubularin related protein 8
MTUS2	microtubule associated tumor suppressor candidate 2	*
MTVR2	mouse mammary tumor virus receptor homolog 2
MUC15	mucin 15, cell surface associated
MUC21	mucin 21, cell surface associated
MUCL1	mucin-like 1
MYADML	myeloid-associated differentiation marker-like (pseudogene)
MYBPC1	myosin binding protein C, slow type
MYF5	myogenic factor 5	*
MYH15	myosin, heavy chain 15
MYH3	myosin, heavy chain 3, skeletal muscle, embryonic
MYL1	myosin, light chain 1, alkali; skeletal, fast
MYL3	myosin, light chain 3, alkali; ventricular, skeletal, slow
MYO18B	myosin XVIIIB	*
MYO1A	myosin IA
MYO3B	myosin IIIB
MYOT	myotilin
MYT1	myelin transcription factor 1
MYT1L	myelin transcription factor 1-like
NAA11	N(alpha)-acetyltransferase 11, NatA catalytic subunit	*
NAA60	N(alpha)-acetyltransferase 60, NatF catalytic subunit	*
NACA2	nascent polypeptide-associated complex alpha subunit 2	*
NAIP	NLR family, apoptosis inhibitory protein	*
NANOG	Nanog homeobox	*
NAP1L2	nucleosome assembly protein 1-like 2
NAP1L5	nucleosome assembly protein 1-like 5
NAP1L6	nucleosome assembly protein 1-like 6	*
NAT8	N-acetyltransferase 8 (GCN5-related, putative)
NAT8B	N-acetyltransferase 8B (GCN5-related, putative, gene/pseudogene)
NBPF22P	neuroblastoma breakpoint family, member 22, pseudogene	*
NBPF4	neuroblastoma breakpoint family, member 4	*
NBPF6	neuroblastoma breakpoint family, member 6	*
NCAPH2	non-SMC condensin II complex, subunit H2
NCF1C	neutrophil cytosolic factor 1C pseudogene
NCF2	neutrophil cytosolic factor 2	*
NCKAP1L	NCK-associated protein 1-like
NCKAP5L	NCK-associated protein 5-like
NCOR1P1	nuclear receptor corepressor 1 pseudogene 1
NDRG4	NDRG family member 4	*
NDUFAB1	NADH dehydrogenase (ubiquinone) 1, alpha/beta subcomplex, 1, 8kDa
NDUFS8	NADH dehydrogenase (ubiquinone) Fe-S protein 8, 23kDa (NADH-coenzyme Q reductase)
NELL2	NEL-like 2 (chicken)
NEUROD6	neuronal differentiation 6
NFKBIL1	nuclear factor of kappa light polypeptide gene enhancer in B-cells inhibitor-like 1	*
NGEF	neuronal guanine nucleotide exchange factor
NHS	Nance-Horan syndrome (congenital cataracts and dental anomalies)
NIF3L1	NIF3 NGG1 interacting factor 3-like 1 (S. cerevisiae)
NLGN4X	neuroligin 4, X-linked	*
NLRC4	NLR family, CARD domain containing 4
NLRP11	NLR family, pyrin domain containing 11
NLRP13	NLR family, pyrin domain containing 13
NLRP2	NLR family, pyrin domain containing 2	*
NLRP3	NLR family, pyrin domain containing 3
NLRP4	NLR family, pyrin domain containing 4
NLRP5	NLR family, pyrin domain containing 5
NLRP7	NLR family, pyrin domain containing 7
NLRP8	NLR family, pyrin domain containing 8
NMNAT2	nicotinamide nucleotide adenylyltransferase 2
NMUR2	neuromedin U receptor 2
NOBOX	NOBOX oogenesis homeobox
NOTCH4	notch 4
NPFFR1	neuropeptide FF receptor 1
NPFFR2	neuropeptide FF receptor 2	*
NPHS1	nephrosis 1, congenital, Finnish type (nephrin)
NPS	neuropeptide S
NPSR1	neuropeptide S receptor 1
NPSR1-AS1	NPSR1 antisense RNA 1
NPVF	neuropeptide VF precursor
NPY6R	neuropeptide Y receptor Y6 (pseudogene)
NR1H4	nuclear receptor subfamily 1, group H, member 4
NR1I2	nuclear receptor subfamily 1, group I, member 2	*
NRBP2	nuclear receptor binding protein 2
NRIP2	nuclear receptor interacting protein 2
NRL	neural retina leucine zipper	*
NRXN1	neurexin 1
NRXN3	neurexin 3	*
NUDT10	nudix (nucleoside diphosphate linked moiety X)-type motif 10
NUDT16P1	nudix (nucleoside diphosphate linked moiety X)-type motif 16 pseudogene 1
NUMBL	numb homolog (Drosophila)-like
NUP62CL	nucleoporin 62kDa C-terminal like
NXF2	nuclear RNA export factor 2	*
NXF2B	nuclear RNA export factor 2B	*
NXPE2	neurexophilin and PC-esterase domain family, member 2
NYAP2	neuronal tyrosine-phosphorylated phosphoinositide-3-kinase adaptor 2	*
OACYLP	O-acyltransferase like, pseudogene
OAS1	2'-5'-oligoadenylate synthetase 1, 40/46kDa
OAS3	2'-5'-oligoadenylate synthetase 3, 100kDa
OBP2B	odorant binding protein 2B
OC90	otoconin 90
OCM	oncomodulin
OCM2	oncomodulin 2
ODZ1	odz, odd Oz/ten-m homolog 1 (Drosophila)
ODZ2	odz, odd Oz/ten-m homolog 2 (Drosophila)	*
OPALIN	oligodendrocytic myelin paranodal and inner loop protein
OPCML	opioid binding protein/cell adhesion molecule-like	*
OPRM1	opioid receptor, mu 1	*
OR10A3	olfactory receptor, family 10, subfamily A, member 3
OR10A5	olfactory receptor, family 10, subfamily A, member 5
OR10AD1	olfactory receptor, family 10, subfamily AD, member 1
OR10G2	olfactory receptor, family 10, subfamily G, member 2
OR10G4	olfactory receptor, family 10, subfamily G, member 4
OR10G7	olfactory receptor, family 10, subfamily G, member 7
OR10G8	olfactory receptor, family 10, subfamily G, member 8
OR10G9	olfactory receptor, family 10, subfamily G, member 9
OR10H1	olfactory receptor, family 10, subfamily H, member 1
OR10H2	olfactory receptor, family 10, subfamily H, member 2
OR10H3	olfactory receptor, family 10, subfamily H, member 3	*
OR10H4	olfactory receptor, family 10, subfamily H, member 4
OR10J1	olfactory receptor, family 10, subfamily J, member 1	*
OR10J3	olfactory receptor, family 10, subfamily J, member 3
OR10J5	olfactory receptor, family 10, subfamily J, member 5
OR10K2	olfactory receptor, family 10, subfamily K, member 2
OR10P1	olfactory receptor, family 10, subfamily P, member 1
OR10R2	olfactory receptor, family 10, subfamily R, member 2
OR10S1	olfactory receptor, family 10, subfamily S, member 1
OR10V1	olfactory receptor, family 10, subfamily V, member 1
OR10Z1	olfactory receptor, family 10, subfamily Z, member 1
OR11A1	olfactory receptor, family 11, subfamily A, member 1	*
OR11H4	olfactory receptor, family 11, subfamily H, member 4
OR11L1	olfactory receptor, family 11, subfamily L, member 1
OR13C3	olfactory receptor, family 13, subfamily C, member 3
OR13C4	olfactory receptor, family 13, subfamily C, member 4	*
OR13C8	olfactory receptor, family 13, subfamily C, member 8
OR13G1	olfactory receptor, family 13, subfamily G, member 1
OR13H1	olfactory receptor, family 13, subfamily H, member 1
OR14A16	olfactory receptor, family 14, subfamily A, member 16
OR1A2	olfactory receptor, family 1, subfamily A, member 2
OR1B1	olfactory receptor, family 1, subfamily B, member 1
OR1C1	olfactory receptor, family 1, subfamily C, member 1
OR1D4	olfactory receptor, family 1, subfamily D, member 4 (gene/pseudogene)	*
OR1D5	olfactory receptor, family 1, subfamily D, member 5	*
OR1E2	olfactory receptor, family 1, subfamily E, member 2	*
OR1G1	olfactory receptor, family 1, subfamily G, member 1
OR1I1	olfactory receptor, family 1, subfamily I, member 1
OR1J2	olfactory receptor, family 1, subfamily J, member 2
OR1L1	olfactory receptor, family 1, subfamily L, member 1	*
OR1L4	olfactory receptor, family 1, subfamily L, member 4
OR1L8	olfactory receptor, family 1, subfamily L, member 8
OR1M1	olfactory receptor, family 1, subfamily M, member 1
OR1N1	olfactory receptor, family 1, subfamily N, member 1	*
OR1N2	olfactory receptor, family 1, subfamily N, member 2
OR1S1	olfactory receptor, family 1, subfamily S, member 1
OR1S2	olfactory receptor, family 1, subfamily S, member 2
OR2A5	olfactory receptor, family 2, subfamily A, member 5
OR2AG1	olfactory receptor, family 2, subfamily AG, member 1	*
OR2AG2	olfactory receptor, family 2, subfamily AG, member 2
OR2B11	olfactory receptor, family 2, subfamily B, member 11
OR2C3	olfactory receptor, family 2, subfamily C, member 3	*
OR2D2	olfactory receptor, family 2, subfamily D, member 2
OR2G3	olfactory receptor, family 2, subfamily G, member 3
OR2G6	olfactory receptor, family 2, subfamily G, member 6
OR2H1	olfactory receptor, family 2, subfamily H, member 1
OR2H2	olfactory receptor, family 2, subfamily H, member 2
OR2L13	olfactory receptor, family 2, subfamily L, member 13	*
OR2M1P	olfactory receptor, family 2, subfamily M, member 1 pseudogene
OR2M2	olfactory receptor, family 2, subfamily M, member 2
OR2M3	olfactory receptor, family 2, subfamily M, member 3	*
OR2M4	olfactory receptor, family 2, subfamily M, member 4
OR2M5	olfactory receptor, family 2, subfamily M, member 5
OR2M7	olfactory receptor, family 2, subfamily M, member 7	*
OR2T1	olfactory receptor, family 2, subfamily T, member 1
OR2T11	olfactory receptor, family 2, subfamily T, member 11	*
OR2T2	olfactory receptor, family 2, subfamily T, member 2	*
OR2T27	olfactory receptor, family 2, subfamily T, member 27	*
OR2T29	olfactory receptor, family 2, subfamily T, member 29
OR2T3	olfactory receptor, family 2, subfamily T, member 3
OR2T33	olfactory receptor, family 2, subfamily T, member 33
OR2T34	olfactory receptor, family 2, subfamily T, member 34
OR2T35	olfactory receptor, family 2, subfamily T, member 35	*
OR2T4	olfactory receptor, family 2, subfamily T, member 4	*
OR2T5	olfactory receptor, family 2, subfamily T, member 5
OR2T6	olfactory receptor, family 2, subfamily T, member 6	*
OR2V2	olfactory receptor, family 2, subfamily V, member 2
OR2W3	olfactory receptor, family 2, subfamily W, member 3
OR2W5	olfactory receptor, family 2, subfamily W, member 5
OR2Y1	olfactory receptor, family 2, subfamily Y, member 1	*
OR2Z1	olfactory receptor, family 2, subfamily Z, member 1	*
OR3A1	olfactory receptor, family 3, subfamily A, member 1
OR3A2	olfactory receptor, family 3, subfamily A, member 2	*
OR3A3	olfactory receptor, family 3, subfamily A, member 3	*
OR3A4P	olfactory receptor, family 3, subfamily A, member 4 pseudogene
OR4A5	olfactory receptor, family 4, subfamily A, member 5
OR4C13	olfactory receptor, family 4, subfamily C, member 13	*
OR4C3	olfactory receptor, family 4, subfamily C, member 3
OR4C46	olfactory receptor, family 4, subfamily C, member 46	*
OR4D10	olfactory receptor, family 4, subfamily D, member 10	*
OR4D2	olfactory receptor, family 4, subfamily D, member 2	*
OR4D5	olfactory receptor, family 4, subfamily D, member 5
OR4D6	olfactory receptor, family 4, subfamily D, member 6
OR4D9	olfactory receptor, family 4, subfamily D, member 9
OR4E2	olfactory receptor, family 4, subfamily E, member 2
OR4F15	olfactory receptor, family 4, subfamily F, member 15	*
OR4F6	olfactory receptor, family 4, subfamily F, member 6
OR4K13	olfactory receptor, family 4, subfamily K, member 13
OR4L1	olfactory receptor, family 4, subfamily L, member 1	*
OR4M1	olfactory receptor, family 4, subfamily M, member 1
OR4M2	olfactory receptor, family 4, subfamily M, member 2
OR4N3P	olfactory receptor, family 4, subfamily N, member 3 pseudogene
OR4S1	olfactory receptor, family 4, subfamily S, member 1
OR4X1	olfactory receptor, family 4, subfamily X, member 1
OR4X2	olfactory receptor, family 4, subfamily X, member 2
OR51A4	olfactory receptor, family 51, subfamily A, member 4
OR51D1	olfactory receptor, family 51, subfamily D, member 1
OR51G1	olfactory receptor, family 51, subfamily G, member 1
OR51G2	olfactory receptor, family 51, subfamily G, member 2
OR51I1	olfactory receptor, family 51, subfamily I, member 1
OR51I2	olfactory receptor, family 51, subfamily I, member 2
OR51L1	olfactory receptor, family 51, subfamily L, member 1
OR51Q1	olfactory receptor, family 51, subfamily Q, member 1
OR51S1	olfactory receptor, family 51, subfamily S, member 1
OR51T1	olfactory receptor, family 51, subfamily T, member 1
OR52B2	olfactory receptor, family 52, subfamily B, member 2
OR52B4	olfactory receptor, family 52, subfamily B, member 4
OR52B6	olfactory receptor, family 52, subfamily B, member 6
OR52E2	olfactory receptor, family 52, subfamily E, member 2
OR52I1	olfactory receptor, family 52, subfamily I, member 1
OR52I2	olfactory receptor, family 52, subfamily I, member 2
OR52J3	olfactory receptor, family 52, subfamily J, member 3
OR52K2	olfactory receptor, family 52, subfamily K, member 2
OR52M1	olfactory receptor, family 52, subfamily M, member 1
OR52N1	olfactory receptor, family 52, subfamily N, member 1
OR52W1	olfactory receptor, family 52, subfamily W, member 1
OR56A1	olfactory receptor, family 56, subfamily A, member 1	*
OR56A3	olfactory receptor, family 56, subfamily A, member 3
OR56A4	olfactory receptor, family 56, subfamily A, member 4
OR56A5	olfactory receptor, family 56, subfamily A, member 5
OR5A1	olfactory receptor, family 5, subfamily A, member 1	*
OR5A2	olfactory receptor, family 5, subfamily A, member 2	*
OR5AN1	olfactory receptor, family 5, subfamily AN, member 1
OR5AP2	olfactory receptor, family 5, subfamily AP, member 2
OR5AU1	olfactory receptor, family 5, subfamily AU, member 1	*
OR5C1	olfactory receptor, family 5, subfamily C, member 1
OR5D14	olfactory receptor, family 5, subfamily D, member 14	*
OR5D16	olfactory receptor, family 5, subfamily D, member 16	*
OR5K2	olfactory receptor, family 5, subfamily K, member 2
OR5L2	olfactory receptor, family 5, subfamily L, member 2	*
OR5M1	olfactory receptor, family 5, subfamily M, member 1
OR5M10	olfactory receptor, family 5, subfamily M, member 10	*
OR5R1	olfactory receptor, family 5, subfamily R, member 1
OR6A2	olfactory receptor, family 6, subfamily A, member 2
OR6B1	olfactory receptor, family 6, subfamily B, member 1
OR6B2	olfactory receptor, family 6, subfamily B, member 2
OR6B3	olfactory receptor, family 6, subfamily B, member 3
OR6C74	olfactory receptor, family 6, subfamily C, member 74
OR6C75	olfactory receptor, family 6, subfamily C, member 75
OR6F1	olfactory receptor, family 6, subfamily F, member 1
OR6K2	olfactory receptor, family 6, subfamily K, member 2
OR6K3	olfactory receptor, family 6, subfamily K, member 3	*
OR6K6	olfactory receptor, family 6, subfamily K, member 6
OR6M1	olfactory receptor, family 6, subfamily M, member 1
OR6N1	olfactory receptor, family 6, subfamily N, member 1
OR6N2	olfactory receptor, family 6, subfamily N, member 2
OR6T1	olfactory receptor, family 6, subfamily T, member 1	*
OR6V1	olfactory receptor, family 6, subfamily V, member 1
OR6W1P	olfactory receptor, family 6, subfamily W, member 1 pseudogene
OR6Y1	olfactory receptor, family 6, subfamily Y, member 1
OR7A10	olfactory receptor, family 7, subfamily A, member 10	*
OR7A17	olfactory receptor, family 7, subfamily A, member 17
OR7A5	olfactory receptor, family 7, subfamily A, member 5
OR7C1	olfactory receptor, family 7, subfamily C, member 1
OR7C2	olfactory receptor, family 7, subfamily C, member 2
OR7E91P	olfactory receptor, family 7, subfamily E, member 91 pseudogene
OR7G1	olfactory receptor, family 7, subfamily G, member 1
OR8A1	olfactory receptor, family 8, subfamily A, member 1
OR8B12	olfactory receptor, family 8, subfamily B, member 12
OR8B2	olfactory receptor, family 8, subfamily B, member 2
OR8B3	olfactory receptor, family 8, subfamily B, member 3
OR8B4	olfactory receptor, family 8, subfamily B, member 4
OR8B8	olfactory receptor, family 8, subfamily B, member 8
OR8D1	olfactory receptor, family 8, subfamily D, member 1	*
OR8D2	olfactory receptor, family 8, subfamily D, member 2
OR8D4	olfactory receptor, family 8, subfamily D, member 4
OR9A2	olfactory receptor, family 9, subfamily A, member 2	*
OR9A4	olfactory receptor, family 9, subfamily A, member 4
OR9G4	olfactory receptor, family 9, subfamily G, member 4
OR9I1	olfactory receptor, family 9, subfamily I, member 1	*
OR9Q1	olfactory receptor, family 9, subfamily Q, member 1
OR9Q2	olfactory receptor, family 9, subfamily Q, member 2
OTC	ornithine carbamoyltransferase
OTOA	otoancorin	*
OTUD7A	OTU domain containing 7A
OVCH1	ovochymase 1	*
P2RY10	purinergic receptor P2Y, G-protein coupled, 10
P2RY14	purinergic receptor P2Y, G-protein coupled, 14
P2RY6	pyrimidinergic receptor P2Y, G-protein coupled, 6
PADI4	peptidyl arginine deiminase, type IV	*
PADI6	peptidyl arginine deiminase, type VI
PAEP	progestagen-associated endometrial protein
PAK3	p21 protein (Cdc42/Rac)-activated kinase 3	*
PAK7	p21 protein (Cdc42/Rac)-activated kinase 7
PALM	paralemmin
PANX3	pannexin 3
PAPPA2	pappalysin 2	*
PAR1	Prader-Willi/Angelman region-1
PAR5	Prader-Willi/Angelman syndrome-5
PARVG	parvin, gamma
PATE1	prostate and testis expressed 1
PATE2	prostate and testis expressed 2	*
PATE3	prostate and testis expressed 3	*
PATE4	prostate and testis expressed 4
PATL2	protein associated with topoisomerase II homolog 2 (yeast)
PAX3	paired box 3
PAX4	paired box 4
PBOV1	prostate and breast cancer overexpressed 1
PCA3	prostate cancer antigen 3 (non-protein coding)
PCDHB1	protocadherin beta 1	*
PCDHB6	protocadherin beta 6
PCK1	phosphoenolpyruvate carboxykinase 1 (soluble)
PCP4L1	Purkinje cell protein 4 like 1
PDE11A	phosphodiesterase 11A	*
PDE4D	phosphodiesterase 4D, cAMP-specific
PDE4DIP	phosphodiesterase 4D interacting protein
PDE6H	phosphodiesterase 6H, cGMP-specific, cone, gamma
PDHA2	pyruvate dehydrogenase (lipoamide) alpha 2	*
PDILT	protein disulfide isomerase-like, testis expressed
PDRG1	p53 and DNA-damage regulated 1	*
PDYN	prodynorphin
PDZD2	PDZ domain containing 2
PEG3	paternally expressed 3	*
PEG3-AS1	PEG3 antisense RNA 1	*
PEX11B	peroxisomal biogenesis factor 11 beta
PFKFB1	6-phosphofructo-2-kinase/fructose-2,6-biphosphatase 1
PGA3	pepsinogen 3, group I (pepsinogen A)
PGA4	pepsinogen 4, group I (pepsinogen A)
PGA5	pepsinogen 5, group I (pepsinogen A)
PGAM1	phosphoglycerate mutase 1 (brain)
PGBD5	piggyBac transposable element derived 5
PGC	progastricsin (pepsinogen C)
PGLYRP3	peptidoglycan recognition protein 3
PHACTR1	phosphatase and actin regulator 1
PHACTR3	phosphatase and actin regulator 3	*
PI15	peptidase inhibitor 15
PI3	peptidase inhibitor 3, skin-derived	*
PIEZO2	piezo-type mechanosensitive ion channel component 2
PIP	prolactin-induced protein
PIRT	phosphoinositide-interacting regulator of transient receptor potential channels
PITPNM2	phosphatidylinositol transfer protein, membrane-associated 2
PKD1L2	polycystic kidney disease 1-like 2
PKD1P1	polycystic kidney disease 1 (autosomal dominant) pseudogene 1
PKD2L1	polycystic kidney disease 2-like 1	*
PLA2G2A	phospholipase A2, group IIA (platelets, synovial fluid)
PLA2G2C	phospholipase A2, group IIC
PLA2G2F	phospholipase A2, group IIF
PLAC4	placenta-specific 4	*
PLCH1	phospholipase C, eta 1
PLEKHS1	pleckstrin homology domain containing, family S member 1
PLG	plasminogen
PLGLA	plasminogen-like A	*
PLGLB1	plasminogen-like B1
PLGLB2	plasminogen-like B2
PLP1	proteolipid protein 1
PLVAP	plasmalemma vesicle associated protein
PLXND1	plexin D1
PMCHL1	pro-melanin-concentrating hormone-like 1, pseudogene	*
PMCHL2	pro-melanin-concentrating hormone-like 2, pseudogene	*
PNLIP	pancreatic lipase
PNLIPRP1	pancreatic lipase-related protein 1
PNLIPRP2	pancreatic lipase-related protein 2	*
PNPLA1	patatin-like phospholipase domain containing 1
POLR2J3	polymerase (RNA) II (DNA directed) polypeptide J3
POLR2J4	polymerase (RNA) II (DNA directed) polypeptide J4, pseudogene
POMC	proopiomelanocortin
POMGNT1	protein O-linked mannose beta1,2-N-acetylglucosaminyltransferase	*
PON1	paraoxonase 1
POTEB	POTE ankyrin domain family, member B
POTEH	POTE ankyrin domain family, member H
POU5F1B	POU class 5 homeobox 1B
POU6F2	POU class 6 homeobox 2
PPARG	peroxisome proliferator-activated receptor gamma
PPEF1	protein phosphatase, EF-hand calcium binding domain 1
PPFIA2	protein tyrosine phosphatase, receptor type, f polypeptide (PTPRF), interacting protein (liprin), alpha 2
PPIAL4G	peptidylprolyl isomerase A (cyclophilin A)-like 4G
PPM1A	protein phosphatase, Mg2+/Mn2+ dependent, 1A
PPP1R17	protein phosphatase 1, regulatory subunit 17
PPP1R1B	protein phosphatase 1, regulatory (inhibitor) subunit 1B	*
PPP1R2P9	protein phosphatase 1, regulatory (inhibitor) subunit 2 pseudogene 9
PPP1R3A	protein phosphatase 1, regulatory subunit 3A
PPP2R2B	protein phosphatase 2, regulatory subunit B, beta	*
PPP3R2	protein phosphatase 3, regulatory subunit B, beta
PPY	pancreatic polypeptide
PRAMEF1	PRAME family member 1
PRAMEF10	PRAME family member 10
PRAMEF11	PRAME family member 11
PRAMEF13	PRAME family member 13
PRAMEF14	PRAME family member 14
PRAMEF15	PRAME family member 15	*
PRAMEF16	PRAME family member 16	*
PRAMEF17	PRAME family member 17	*
PRAMEF18	PRAME family member 18	*
PRAMEF19	PRAME family member 19	*
PRAMEF2	PRAME family member 2
PRAMEF20	PRAME family member 20
PRAMEF22	PRAME family member 22
PRAMEF3	PRAME family member 3
PRAMEF8	PRAME family member 8
PRAMEF9	PRAME family member 9	*
PRB1	proline-rich protein BstNI subfamily 1
PRB2	proline-rich protein BstNI subfamily 2
PRB3	proline-rich protein BstNI subfamily 3
PRB4	proline-rich protein BstNI subfamily 4
PRDM10	PR domain containing 10
PRDM7	PR domain containing 7
PRDM9	PR domain containing 9
PRG1	p53-responsive gene 1
PRKAG2	protein kinase, AMP-activated, gamma 2 non-catalytic subunit	*
PRLHR	prolactin releasing hormone receptor
PROKR2	prokineticin receptor 2
PROM1	prominin 1	*
PROP1	PROP paired-like homeobox 1
PRR15L	proline rich 15-like
PRR20A	proline rich 20A	*
PRR20B	proline rich 20B	*
PRR20C	proline rich 20C	*
PRR20D	proline rich 20D	*
PRR20E	proline rich 20E	*
PRR21	proline rich 21
PRR4	proline rich 4 (lacrimal)	*
PRRG3	proline rich Gla (G-carboxyglutamic acid) 3 (transmembrane)
PRSS1	protease, serine, 1 (trypsin 1)
PRSS2	protease, serine, 2 (trypsin 2)
PRSS3	protease, serine, 3	*
PRSS33	protease, serine, 33
PRSS37	protease, serine, 37
PRSS3P2	protease, serine, 3 pseudogene 2
PRSS54	protease, serine, 54
PRSS58	protease, serine, 58
PSG1	pregnancy specific beta-1-glycoprotein 1	*
PSG11	pregnancy specific beta-1-glycoprotein 11
PSG3	pregnancy specific beta-1-glycoprotein 3	*
PSG8	pregnancy specific beta-1-glycoprotein 8
PSG9	pregnancy specific beta-1-glycoprotein 9
PSMF1	proteasome (prosome, macropain) inhibitor subunit 1 (PI31)	*
PSORS1C3	psoriasis susceptibility 1 candidate 3 (non-protein coding)
PTAFR	platelet-activating factor receptor
PTGDR2	prostaglandin D2 receptor 2
PTK6	PTK6 protein tyrosine kinase 6
PTPN3	protein tyrosine phosphatase, non-receptor type 3	*
PTPRVP	protein tyrosine phosphatase, receptor type, V, pseudogene	*
PWRN1	Prader-Willi region non-protein coding RNA 1
PWRN2	Prader-Willi region non-protein coding RNA 2
PYHIN1	pyrin and HIN domain family, member 1
PZP	pregnancy-zone protein
RAB11FIP1	RAB11 family interacting protein 1 (class I)
RAB11FIP3	RAB11 family interacting protein 3 (class II)
RAB17	RAB17, member RAS oncogene family
RAB19	RAB19, member RAS oncogene family
RAB25	RAB25, member RAS oncogene family	*
RAB40B	RAB40B, member RAS oncogene family	*
RAB43	RAB43, member RAS oncogene family
RAB9BP1	RAB9B, member RAS oncogene family pseudogene 1
RACGAP1P	Rac GTPase activating protein 1 pseudogene
RAD21L1	RAD21-like 1 (S. pombe)
RAG1	recombination activating gene 1
RAG2	recombination activating gene 2
RASGRF1	Ras protein-specific guanine nucleotide-releasing factor 1
RBFOX1	RNA binding protein, fox-1 homolog (C. elegans) 1	*
RBP2	retinol binding protein 2, cellular
RCN3	reticulocalbin 3, EF-hand calcium binding domain
RD3	retinal degeneration 3
RDH16	retinol dehydrogenase 16 (all-trans)
RDM1	RAD52 motif 1
REG1B	regenerating islet-derived 1 beta
REG1P	regenerating islet-derived 1 pseudogene
REG3A	regenerating islet-derived 3 alpha	*
RETNLB	resistin like beta
RFPL1	ret finger protein-like 1
RFPL2	ret finger protein-like 2	*
RFPL3	ret finger protein-like 3	*
RFPL4A	ret finger protein-like 4A
RFX4	regulatory factor X, 4 (influences HLA class II expression)	*
RGAG1	retrotransposon gag domain containing 1
RGCC	regulator of cell cycle
RGL4	ral guanine nucleotide dissociation stimulator-like 4
RGPD5	RANBP2-like and GRIP domain containing 5	*
RGPD6	RANBP2-like and GRIP domain containing 6	*
RGR	retinal G protein coupled receptor
RGS11	regulator of G-protein signaling 11
RGS12	regulator of G-protein signaling 12
RGS8	regulator of G-protein signaling 8	*
RHOXF2	Rhox homeobox family, member 2
RHOXF2B	Rhox homeobox family, member 2B
RIMBP2	RIMS binding protein 2
RMST	rhabdomyosarcoma 2 associated transcript (non-protein coding)	*
RNASE11	ribonuclease, RNase A family, 11 (non-active)
RNASE12	ribonuclease, RNase A family, 12 (non-active)
RNASE2	ribonuclease, RNase A family, 2 (liver, eosinophil-derived neurotoxin)
RNASE3	ribonuclease, RNase A family, 3
RNASE6	ribonuclease, RNase A family, k6	*
RNASE8	ribonuclease, RNase A family, 8
RNF148	ring finger protein 148
RNF150	ring finger protein 150
RNF17	ring finger protein 17
RNF186	ring finger protein 186
RNF5P1	ring finger protein 5, E3 ubiquitin protein ligase pseudogene 1
ROBO1	roundabout, axon guidance receptor, homolog 1 (Drosophila)
ROBO2	roundabout, axon guidance receptor, homolog 2 (Drosophila)
ROPN1	rhophilin associated tail protein 1	*
RORA	RAR-related orphan receptor A	*
RP1	retinitis pigmentosa 1 (autosomal dominant)
RP11-165H20.1	CHIA-like pseudogene
RP1L1	retinitis pigmentosa 1-like 1
RPA4	replication protein A4, 30kDa
RPH3A	rabphilin 3A homolog (mouse)
RPL13AP17	ribosomal protein L13a pseudogene 17
RPL13AP3	ribosomal protein L13a pseudogene 3
RPL29P2	ribosomal protein L29 pseudogene 2
RPS26P11	ribosomal protein S26 pseudogene 11
RPS6KA1	ribosomal protein S6 kinase, 90kDa, polypeptide 1
RSPH10B	radial spoke head 10 homolog B (Chlamydomonas)	*
RSPH10B2	radial spoke head 10 homolog B2 (Chlamydomonas)	*
RSPO1	R-spondin 1
RTL1	retrotransposon-like 1
RUFY4	RUN and FYVE domain containing 4
RXRG	retinoid X receptor, gamma
S100A7	S100 calcium binding protein A7
S100A7A	S100 calcium binding protein A7A
S100A7L2	S100 calcium binding protein A7-like 2
S100A8	S100 calcium binding protein A8
S100A9	S100 calcium binding protein A9
S100P	S100 calcium binding protein P
SAG	S-antigen; retina and pineal gland (arrestin)	*
SAGE1	sarcoma antigen 1
SAMD3	sterile alpha motif domain containing 3
SASH3	SAM and SH3 domain containing 3
SATL1	spermidine/spermine N1-acetyl transferase-like 1
SCAPER	S-phase cyclin A-associated protein in the ER
SCARNA11	small Cajal body-specific RNA 11
SCEL	sciellin
SCGB1D1	secretoglobin, family 1D, member 1
SCGB1D2	secretoglobin, family 1D, member 2	*
SCGB1D4	secretoglobin, family 1D, member 4
SCGB2B2	secretoglobin, family 2B, member 2
SCGB3A2	secretoglobin, family 3A, member 2
SCIN	scinderin
SCN10A	sodium channel, voltage-gated, type X, alpha subunit
SCN2B	sodium channel, voltage-gated, type II, beta subunit
SCRT1	scratch homolog 1, zinc finger protein (Drosophila)
SDK1	sidekick cell adhesion molecule 1	*
SDR16C5	short chain dehydrogenase/reductase family 16C, member 5
SDR16C6P	short chain dehydrogenase/reductase family 16C, member 6, pseudogene	*
SDR42E1	short chain dehydrogenase/reductase family 42E, member 1
SDS	serine dehydratase
SELENBP1	selenium binding protein 1
SELP	selectin P (granule membrane protein 140kDa, antigen CD62)
SERPINA1	serpin peptidase inhibitor, clade A (alpha-1 antiproteinase, antitrypsin), member 1	*
SERPINA10	serpin peptidase inhibitor, clade A (alpha-1 antiproteinase, antitrypsin), member 10
SERPINA11	serpin peptidase inhibitor, clade A (alpha-1 antiproteinase, antitrypsin), member 11
SERPINA12	serpin peptidase inhibitor, clade A (alpha-1 antiproteinase, antitrypsin), member 12	*
SERPINA5	serpin peptidase inhibitor, clade A (alpha-1 antiproteinase, antitrypsin), member 5
SERPINA6	serpin peptidase inhibitor, clade A (alpha-1 antiproteinase, antitrypsin), member 6
SERPINA7	serpin peptidase inhibitor, clade A (alpha-1 antiproteinase, antitrypsin), member 7
SERPINA9	serpin peptidase inhibitor, clade A (alpha-1 antiproteinase, antitrypsin), member 9	*
SERPINB13	serpin peptidase inhibitor, clade B (ovalbumin), member 13
SERPINB7	serpin peptidase inhibitor, clade B (ovalbumin), member 7
SERPINC1	serpin peptidase inhibitor, clade C (antithrombin), member 1
SFTPA1	surfactant protein A1	*
SFTPD	surfactant protein D	*
SGK494	uncharacterized serine/threonine-protein kinase SgK494
SHANK2	SH3 and multiple ankyrin repeat domains 2
SHANK3	SH3 and multiple ankyrin repeat domains 3
SHROOM4	shroom family member 4
SIAH3	siah E3 ubiquitin protein ligase family member 3
SIGLEC12	sialic acid binding Ig-like lectin 12 (gene/pseudogene)
SIGLEC14	sialic acid binding Ig-like lectin 14	*
SIGLEC17P	sialic acid binding Ig-like lectin 17, pseudogene	*
SIGLEC7	sialic acid binding Ig-like lectin 7
SIGLEC9	sialic acid binding Ig-like lectin 9
SIPA1L2	signal-induced proliferation-associated 1 like 2	*
SIRPB1	signal-regulatory protein beta 1	*
SIRPB2	signal-regulatory protein beta 2
SIRPD	signal-regulatory protein delta
SIRPG	signal-regulatory protein gamma
SIRT7	sirtuin 7
SLA2	Src-like-adaptor 2
SLAIN1	SLAIN motif family, member 1
SLAMF7	SLAM family member 7
SLC10A1	solute carrier family 10 (sodium/bile acid cotransporter family), member 1	*
SLC10A2	solute carrier family 10 (sodium/bile acid cotransporter family), member 2
SLC12A7	solute carrier family 12 (potassium/chloride transporters), member 7
SLC13A1	solute carrier family 13 (sodium/sulfate symporters), member 1	*
SLC13A2	solute carrier family 13 (sodium-dependent dicarboxylate transporter), member 2	*
SLC15A2	solute carrier family 15 (H+/peptide transporter), member 2
SLC17A1	solute carrier family 17 (sodium phosphate), member 1
SLC17A4	solute carrier family 17 (sodium phosphate), member 4
SLC17A8	solute carrier family 17 (sodium-dependent inorganic phosphate cotransporter), member 8
SLC18A1	solute carrier family 18 (vesicular monoamine), member 1
SLC1A6	solute carrier family 1 (high affinity aspartate/glutamate transporter), member 6
SLC22A12	solute carrier family 22 (organic anion/urate transporter), member 12	*
SLC22A13	solute carrier family 22 (organic anion transporter), member 13	*
SLC22A14	solute carrier family 22, member 14
SLC22A18AS	solute carrier family 22 (organic cation transporter), member 18 antisense
SLC22A2	solute carrier family 22 (organic cation transporter), member 2
SLC22A23	solute carrier family 22, member 23
SLC24A5	solute carrier family 24, member 5
SLC25A41	solute carrier family 25, member 41
SLC25A6	solute carrier family 25 (mitochondrial carrier; adenine nucleotide translocator), member 6	*
SLC26A3	solute carrier family 26, member 3
SLC28A2	solute carrier family 28 (sodium-coupled nucleoside transporter), member 2
SLC28A3	solute carrier family 28 (sodium-coupled nucleoside transporter), member 3
SLC2A9	solute carrier family 2 (facilitated glucose transporter), member 9	*
SLC30A8	solute carrier family 30 (zinc transporter), member 8
SLC34A1	solute carrier family 34 (sodium phosphate), member 1	*
SLC35F4	solute carrier family 35, member F4
SLC36A2	solute carrier family 36 (proton/amino acid symporter), member 2
SLC36A3	solute carrier family 36 (proton/amino acid symporter), member 3
SLC41A3	solute carrier family 41, member 3
SLC44A5	solute carrier family 44, member 5
SLC4A10	solute carrier family 4, sodium bicarbonate transporter, member 10	*
SLC4A5	solute carrier family 4, sodium bicarbonate cotransporter, member 5
SLC52A3	solute carrier family 52, riboflavin transporter, member 3
SLC5A4	solute carrier family 5 (low affinity glucose cotransporter), member 4
SLC5A9	solute carrier family 5 (sodium/glucose cotransporter), member 9
SLC6A14	solute carrier family 6 (amino acid transporter), member 14
SLC7A13	solute carrier family 7 (anionic amino acid transporter), member 13	*
SLC7A2	solute carrier family 7 (cationic amino acid transporter, y+ system), member 2	*
SLC7A3	solute carrier family 7 (cationic amino acid transporter, y+ system), member 3
SLC8A3	solute carrier family 8 (sodium/calcium exchanger), member 3	*
SLC9C2	solute carrier family 9, member C2 (putative)
SLITRK2	SLIT and NTRK-like family, member 2
SMR3A	submaxillary gland androgen regulated protein 3A
SNAR-F	small ILF3/NF90-associated RNA F
SNAR-I	small ILF3/NF90-associated RNA I
SND1-IT1	SND1 intronic transcript 1 (non-protein coding)
SNORA10	small nucleolar RNA, H/ACA box 10
SNORA11B	small nucleolar RNA, H/ACA box 11B
SNORA30	small nucleolar RNA, H/ACA box 30
SNORA47	small nucleolar RNA, H/ACA box 47
SNORA49	small nucleolar RNA, H/ACA box 49
SNORA70C	small nucleolar RNA, H/ACA box 70C
SNORD109A	small nucleolar RNA, C/D box 109A
SNORD109B	small nucleolar RNA, C/D box 109B
SNORD115-11	small nucleolar RNA, C/D box 115-11
SNORD115-2	small nucleolar RNA, C/D box 115-2
SNORD115-29	small nucleolar RNA, C/D box 115-29
SNORD115-3	small nucleolar RNA, C/D box 115-3	*
SNORD115-36	small nucleolar RNA, C/D box 115-36
SNORD115-43	small nucleolar RNA, C/D box 115-43
SNORD116-1	small nucleolar RNA, C/D box 116-1
SNORD116-11	small nucleolar RNA, C/D box 116-11
SNORD116-12	small nucleolar RNA, C/D box 116-12	*
SNORD116-13	small nucleolar RNA, C/D box 116-13	*
SNORD116-14	small nucleolar RNA, C/D box 116-14	*
SNORD116-15	small nucleolar RNA, C/D box 116-15
SNORD116-16	small nucleolar RNA, C/D box 116-16
SNORD116-17	small nucleolar RNA, C/D box 116-17
SNORD116-18	small nucleolar RNA, C/D box 116-18
SNORD116-19	small nucleolar RNA, C/D box 116-19
SNORD116-2	small nucleolar RNA, C/D box 116-2	*
SNORD116-21	small nucleolar RNA, C/D box 116-21
SNORD116-22	small nucleolar RNA, C/D box 116-22
SNORD116-23	small nucleolar RNA, C/D box 116-23
SNORD116-3	small nucleolar RNA, C/D box 116-3
SNORD116-4	small nucleolar RNA, C/D box 116-4
SNORD116-5	small nucleolar RNA, C/D box 116-5
SNORD116-6	small nucleolar RNA, C/D box 116-6
SNORD116-7	small nucleolar RNA, C/D box 116-7
SNORD116-8	small nucleolar RNA, C/D box 116-8
SNORD116-9	small nucleolar RNA, C/D box 116-9
SNORD14C	small nucleolar RNA, C/D box 14C
SNORD14D	small nucleolar RNA, C/D box 14D
SNORD32B	small nucleolar RNA, C/D box 32B	*
SNORD33	small nucleolar RNA, C/D box 33
SNORD34	small nucleolar RNA, C/D box 34
SNORD35A	small nucleolar RNA, C/D box 35A
SNORD64	small nucleolar RNA, C/D box 64
SNORD88A	small nucleolar RNA, C/D box 88A
SNORD88B	small nucleolar RNA, C/D box 88B
SNRPN	small nuclear ribonucleoprotein polypeptide N	*
SOAT2	sterol O-acyltransferase 2
SORBS1	sorbin and SH3 domain containing 1	*
SORBS2	sorbin and SH3 domain containing 2	*
SOSTDC1	sclerostin domain containing 1
SOX6	SRY (sex determining region Y)-box 6	*
SP140	SP140 nuclear body protein	*
SP7	Sp7 transcription factor
SPACA3	sperm acrosome associated 3
SPACA5B	sperm acrosome associated 5B
SPAG11A	sperm associated antigen 11A
SPAG11B	sperm associated antigen 11B
SPAM1	sperm adhesion molecule 1 (PH-20 hyaluronidase, zona pellucida binding)	*
SPANXA1	sperm protein associated with the nucleus, X-linked, family member A1
SPANXA2	SPANX family, member A2
SPANXN1	SPANX family, member N1
SPANXN3	SPANX family, member N3
SPANXN4	SPANX family, member N4
SPANXN5	SPANX family, member N5
SPATA19	spermatogenesis associated 19
SPATA21	spermatogenesis associated 21
SPATA25	spermatogenesis associated 25
SPATA8	spermatogenesis associated 8
SPATA9	spermatogenesis associated 9
SPECC1	sperm antigen with calponin homology and coiled-coil domains 1
SPERT	spermatid associated
SPHKAP	SPHK1 interactor, AKAP domain containing
SPI1	spleen focus forming virus (SFFV) proviral integration oncogene spi1
SPICE1	spindle and centriole associated protein 1
SPINK1	serine peptidase inhibitor, Kazal type 1
SPINK13	serine peptidase inhibitor, Kazal type 13 (putative)
SPINK14	serine peptidase inhibitor, Kazal type 14 (putative)	*
SPINK5	serine peptidase inhibitor, Kazal type 5
SPINK9	serine peptidase inhibitor, Kazal type 9	*
SPINT3	serine peptidase inhibitor, Kunitz type, 3	*
SPIRE2	spire homolog 2 (Drosophila)
SPRR1A	small proline-rich protein 1A
SPRR1B	small proline-rich protein 1B
SPRR2A	small proline-rich protein 2A
SPRR2B	small proline-rich protein 2B
SPRR2C	small proline-rich protein 2C (pseudogene)
SPRR2D	small proline-rich protein 2D
SPRR2E	small proline-rich protein 2E
SPRR2F	small proline-rich protein 2F
SPRR2G	small proline-rich protein 2G
SPRR3	small proline-rich protein 3	*
SPRR4	small proline-rich protein 4
SPRY3	sprouty homolog 3 (Drosophila)	*
SPTSSB	serine palmitoyltransferase, small subunit B
SPZ1	spermatogenic leucine zipper 1
SSU72P8	SSU72 RNA polymerase II CTD phosphatase homolog (S. cerevisiae) pseudogene 8
SSX1	synovial sarcoma, X breakpoint 1
SSX2	synovial sarcoma, X breakpoint 2	*
SSX3	synovial sarcoma, X breakpoint 3	*
SSX4	synovial sarcoma, X breakpoint 4	*
SSX4B	synovial sarcoma, X breakpoint 4B	*
SSX5	synovial sarcoma, X breakpoint 5
SSX7	synovial sarcoma, X breakpoint 7
SSX8	synovial sarcoma, X breakpoint 8
SSX9	synovial sarcoma, X breakpoint 9	*
ST8SIA4	ST8 alpha-N-acetyl-neuraminide alpha-2,8-sialyltransferase 4
STAB2	stabilin 2
STOML3	stomatin (EPB72)-like 3
STON1	stonin 1
STRA8	stimulated by retinoic acid gene 8 homolog (mouse)	*
STRC	stereocilin
STS	steroid sulfatase (microsomal), isozyme S
SUCLG2	succinate-CoA ligase, GDP-forming, beta subunit
SULT1C2	sulfotransferase family, cytosolic, 1C, member 2
SULT1E1	sulfotransferase family 1E, estrogen-preferring, member 1
SULT2B1	sulfotransferase family, cytosolic, 2B, member 1	*
SUMO1P1	SUMO1 pseudogene 1
SVOP	SV2 related protein homolog (rat)
SVOPL	SVOP-like	*
SWSAP1	SWIM-type zinc finger 7 associated protein 1
SYBU	syntabulin (syntaxin-interacting)	*
SYCE1L	synaptonemal complex central element protein 1-like
SYCP1	synaptonemal complex protein 1
SYK	spleen tyrosine kinase
SYNE2	spectrin repeat containing, nuclear envelope 2	*
SYNPR	synaptoporin	*
SYT14L	synaptotagmin XIV-like
SYT16	synaptotagmin XVI
TAAR2	trace amine associated receptor 2	*
TAAR8	trace amine associated receptor 8	*
TAC4	tachykinin 4 (hemokinin)
TACC2	transforming, acidic coiled-coil containing protein 2	*
TAF9B	TAF9B RNA polymerase II, TATA box binding protein (TBP)-associated factor, 31kDa
TAL2	T-cell acute lymphocytic leukemia 2
TAS1R2	taste receptor, type 1, member 2
TAS2R16	taste receptor, type 2, member 16	*
TAS2R3	taste receptor, type 2, member 3
TAS2R31	taste receptor, type 2, member 31
TAS2R38	taste receptor, type 2, member 38	*
TAS2R4	taste receptor, type 2, member 4	*
TAS2R43	taste receptor, type 2, member 43
TAS2R5	taste receptor, type 2, member 5	*
TAS2R60	taste receptor, type 2, member 60
TAS2R9	taste receptor, type 2, member 9
TAT	tyrosine aminotransferase
TBC1D26	TBC1 domain family, member 26
TBC1D28	TBC1 domain family, member 28
TBC1D29	TBC1 domain family, member 29
TBC1D3P1-DHX40P1	TBC1D3P1-DHX40P1 readthrough (non-protein coding)
TBC1D3P2	TBC1 domain family, member 3 pseudogene 2
TBX19	T-box 19
TBX22	T-box 22
TBXAS1	thromboxane A synthase 1 (platelet)	*
TCF21	transcription factor 21
TCHHL1	trichohyalin-like 1
[truncated: 227 more rows]

## Sheet: LMNA, TSS-downstream
Table S1 (cont.). Genes enriched in LMNA in the downstream region
symbol	description	redundant with at least one other region
A2ML1	alpha-2-macroglobulin-like 1	*
AADACL3	arylacetamide deacetylase-like 3	*
ABCB5	ATP-binding cassette, sub-family B (MDR/TAP), member 5
ABCC11	ATP-binding cassette, sub-family C (CFTR/MRP), member 11	*
ABCC6	ATP-binding cassette, sub-family C (CFTR/MRP), member 6
ABCC6P1	ATP-binding cassette, sub-family C, member 6 pseudogene 1
ABCC6P2	ATP-binding cassette, sub-family C, member 6 pseudogene 2
ABCG4	ATP-binding cassette, sub-family G (WHITE), member 4	*
ABCG8	ATP-binding cassette, sub-family G (WHITE), member 8
ABLIM1	actin binding LIM protein 1	*
ACE	angiotensin I converting enzyme (peptidyl-dipeptidase A) 1
ACOT11	acyl-CoA thioesterase 11
ACPL2	acid phosphatase-like 2
ACPT	acid phosphatase, testicular
ACR	acrosin
ACTG1P4	actin, gamma 1 pseudogene 4
ACTG2	actin, gamma 2, smooth muscle, enteric
ACTRT1	actin-related protein T1	*
ACVR1C	activin A receptor, type IC
ACY3	aspartoacylase (aminocyclase) 3
ADAM18	ADAM metallopeptidase domain 18
ADAM21P1	ADAM metallopeptidase domain 21 pseudogene 1
ADCY10	adenylate cyclase 10 (soluble)
ADM2	adrenomedullin 2	*
AFG3L1P	AFG3 ATPase family gene 3-like 1 (S. cerevisiae), pseudogene
AGPAT4-IT1	AGPAT4 intronic transcript 1 (non-protein coding)	*
AGR2	anterior gradient 2 homolog (Xenopus laevis)
AHDC1	AT hook, DNA binding motif, containing 1
AKNAD1	AKNA domain containing 1
AKR1CL1	aldo-keto reductase family 1, member C-like 1	*
AKT1	v-akt murine thymoma viral oncogene homolog 1
ALDH1A1	aldehyde dehydrogenase 1 family, member A1	*
ALDH1A2	aldehyde dehydrogenase 1 family, member A2
ALDOC	aldolase C, fructose-bisphosphate
ALLC	allantoicase
ALOX12B	arachidonate 12-lipoxygenase, 12R type
AMICA1	adhesion molecule, interacts with CXADR antigen 1	*
ANGPTL6	angiopoietin-like 6
ANKK1	ankyrin repeat and kinase domain containing 1
ANKRD30B	ankyrin repeat domain 30B
ANKRD35	ankyrin repeat domain 35
ANKS4B	ankyrin repeat and sterile alpha motif domain containing 4B
ANO9	anoctamin 9
ANXA2P2	annexin A2 pseudogene 2
ANXA2P3	annexin A2 pseudogene 3
APBA1	amyloid beta (A4) precursor protein-binding, family A, member 1
APOBEC3A	apolipoprotein B mRNA editing enzyme, catalytic polypeptide-like 3A
APOC4	apolipoprotein C-IV
AQP10	aquaporin 10
AQP7P1	aquaporin 7 pseudogene 1
AQP7P2	aquaporin 7 pseudogene 2
AQP8	aquaporin 8
ARF5	ADP-ribosylation factor 5
ARHGAP32	Rho GTPase activating protein 32
ARHGAP9	Rho GTPase activating protein 9	*
ARHGDIB	Rho GDP dissociation inhibitor (GDI) beta	*
ARHGEF3	Rho guanine nucleotide exchange factor (GEF) 3
ARHGEF7	Rho guanine nucleotide exchange factor (GEF) 7	*
ARSE	arylsulfatase E (chondrodysplasia punctata 1)
ARSF	arylsulfatase F
ART3	ADP-ribosyltransferase 3
ASB15	ankyrin repeat and SOCS box containing 15
ASMT	acetylserotonin O-methyltransferase
ATP10B	ATPase, class V, type 10B
ATP2A1	ATPase, Ca++ transporting, cardiac muscle, fast twitch 1
ATP6V0A4	ATPase, H+ transporting, lysosomal V0 subunit a4	*
ATP6V1G2	ATPase, H+ transporting, lysosomal 13kDa, V1 subunit G2
AURKAPS1	aurora kinase A pseudogene 1	*
AURKC	aurora kinase C	*
AWAT1	acyl-CoA wax alcohol acyltransferase 1
AZI1	5-azacytidine induced 1
B3GALT5	UDP-Gal:betaGlcNAc beta 1,3-galactosyltransferase, polypeptide 5	*
BAGE	B melanoma antigen	*
BAGE2	B melanoma antigen family, member 2	*
BAGE3	B melanoma antigen family, member 3	*
BAGE4	B melanoma antigen family, member 4	*
BAGE5	B melanoma antigen family, member 5	*
BAI1	brain-specific angiogenesis inhibitor 1
BANF2	barrier to autointegration factor 2	*
BCAS1	breast carcinoma amplified sequence 1
BCDIN3D-AS1	BCDIN3D antisense RNA 1
BEX5	brain expressed, X-linked 5
BFSP2	beaded filament structural protein 2, phakinin	*
BHLHB9	basic helix-loop-helix domain containing, class B, 9
BMP15	bone morphogenetic protein 15	*
BMP3	bone morphogenetic protein 3	*
BPIFB1	BPI fold containing family B, member 1	*
BPIFB3	BPI fold containing family B, member 3
BPIFB6	BPI fold containing family B, member 6
BTK	Bruton agammaglobulinemia tyrosine kinase	*
BTNL8	butyrophilin-like 8	*
BZRAP1	benzodiazapine receptor (peripheral) associated protein 1
C10orf113	chromosome 10 open reading frame 113
C10orf71	chromosome 10 open reading frame 71
C11orf40	chromosome 11 open reading frame 40	*
C11orf53	chromosome 11 open reading frame 53	*
C12orf40	chromosome 12 open reading frame 40
C12orf74	chromosome 12 open reading frame 74
C14orf118	chromosome 14 open reading frame 118
C14orf182	chromosome 14 open reading frame 182
C14orf23	chromosome 14 open reading frame 23
C15orf41	chromosome 15 open reading frame 41
C17orf47	chromosome 17 open reading frame 47	*
C17orf74	chromosome 17 open reading frame 74
C17orf85	chromosome 17 open reading frame 85
C18orf26	chromosome 18 open reading frame 26
C19orf69	chromosome 19 open reading frame 69
C19orf80	chromosome 19 open reading frame 80
C1orf146	chromosome 1 open reading frame 146	*
C1orf158	chromosome 1 open reading frame 158
C1orf186	chromosome 1 open reading frame 186	*
C1orf88	chromosome 1 open reading frame 88
C20orf112	chromosome 20 open reading frame 112
C20orf118	chromosome 20 open reading frame 118
C20orf152	chromosome 20 open reading frame 152	*
C20orf173	chromosome 20 open reading frame 173
C20orf197	chromosome 20 open reading frame 197	*
C21orf2	chromosome 21 open reading frame 2
C22orf31	chromosome 22 open reading frame 31
C22orf43	chromosome 22 open reading frame 43
C2orf48	chromosome 2 open reading frame 48
C2orf53	chromosome 2 open reading frame 53
C2orf80	chromosome 2 open reading frame 80	*
C3	complement component 3
C3orf35	chromosome 3 open reading frame 35
C4A	complement component 4A (Rodgers blood group)
C4B	complement component 4B (Chido blood group)
C4BPA	complement component 4 binding protein, alpha
C4orf40	chromosome 4 open reading frame 40
C5orf58	chromosome 5 open reading frame 58
C6orf164	chromosome 6 open reading frame 164
C6orf203	chromosome 6 open reading frame 203
C7orf66	chromosome 7 open reading frame 66
C7orf71	chromosome 7 open reading frame 71	*
C8A	complement component 8, alpha polypeptide	*
C8orf42	chromosome 8 open reading frame 42
CACNA1I	calcium channel, voltage-dependent, T type, alpha 1I subunit
CACNB2	calcium channel, voltage-dependent, beta 2 subunit	*
CACNG5	calcium channel, voltage-dependent, gamma subunit 5	*
CACNG8	calcium channel, voltage-dependent, gamma subunit 8
CADM3	cell adhesion molecule 3	*
CALB1	calbindin 1, 28kDa
CALY	calcyon neuron-specific vesicular protein
CARD16	caspase recruitment domain family, member 16
CARD17	caspase recruitment domain family, member 17
CARNS1	carnosine synthase 1
CARS	cysteinyl-tRNA synthetase
CASP1	caspase 1, apoptosis-related cysteine peptidase
CASP5	caspase 5, apoptosis-related cysteine peptidase
CBLN1	cerebellin 1 precursor
CCDC122	coiled-coil domain containing 122
CCDC172	coiled-coil domain containing 172
CCDC42B	coiled-coil domain containing 42B
CCDC70	coiled-coil domain containing 70
CCL16	chemokine (C-C motif) ligand 16	*
CCL19	chemokine (C-C motif) ligand 19
CCL24	chemokine (C-C motif) ligand 24	*
CCL3L1	chemokine (C-C motif) ligand 3-like 1	*
CCL3L3	chemokine (C-C motif) ligand 3-like 3	*
CCL7	chemokine (C-C motif) ligand 7
CCL8	chemokine (C-C motif) ligand 8
CD180	CD180 molecule
CD1A	CD1a molecule	*
CD1C	CD1c molecule	*
CD1D	CD1d molecule
CD207	CD207 molecule, langerin
CD2AP	CD2-associated protein
CD300C	CD300c molecule	*
CD300LF	CD300 molecule-like family member f
CDH12	cadherin 12, type 2 (N-cadherin 2)	*
CDH18	cadherin 18, type 2
CDH26	cadherin 26	*
CDYL	chromodomain protein, Y-like	*
CEACAM20	carcinoembryonic antigen-related cell adhesion molecule 20
CEACAM3	carcinoembryonic antigen-related cell adhesion molecule 3	*
CEACAM4	carcinoembryonic antigen-related cell adhesion molecule 4
CEACAM5	carcinoembryonic antigen-related cell adhesion molecule 5	*
CEACAM6	carcinoembryonic antigen-related cell adhesion molecule 6 (non-specific cross reacting antigen)
CEACAM8	carcinoembryonic antigen-related cell adhesion molecule 8
CEBPB	CCAAT/enhancer binding protein (C/EBP), beta
CECR1	cat eye syndrome chromosome region, candidate 1
CELF2	CUGBP, Elav-like family member 2
CELSR1	cadherin, EGF LAG seven-pass G-type receptor 1 (flamingo homolog, Drosophila)
CENPBD1	CENPB DNA-binding domains containing 1
CHADL	chondroadherin-like
CHGA	chromogranin A (parathyroid secretory protein 1)	*
CHIC2	cysteine-rich hydrophobic domain 2
CHID1	chitinase domain containing 1
CHORDC1	cysteine and histidine-rich domain (CHORD) containing 1
CHST15	carbohydrate (N-acetylgalactosamine 4-sulfate 6-O) sulfotransferase 15
CIB1	calcium and integrin binding 1 (calmyrin)
CIDEC	cell death-inducing DFFA-like effector c
CIITA	class II, major histocompatibility complex, transactivator
CIZ1	CDKN1A interacting zinc finger protein 1
CLCN5	chloride channel, voltage-sensitive 5
CLCNKB	chloride channel, voltage-sensitive Kb
CLDN10	claudin 10	*
CLDN17	claudin 17	*
CLDND2	claudin domain containing 2
CLEC10A	C-type lectin domain family 10, member A
CLEC17A	C-type lectin domain family 17, member A
CLEC1B	C-type lectin domain family 1, member B
CLEC4F	C-type lectin domain family 4, member F	*
CLEC5A	C-type lectin domain family 5, member A
CLK2P	CDC-like kinase 2, pseudogene
CLPP	ClpP caseinolytic peptidase, ATP-dependent, proteolytic subunit homolog (E. coli)
CLPSL1	colipase-like 1	*
CLRN2	clarin 2
CLTCL1	clathrin, heavy chain-like 1
CLVS1	clavesin 1	*
COCH	coagulation factor C homolog, cochlin (Limulus polyphemus)
COL21A1	collagen, type XXI, alpha 1
COL22A1	collagen, type XXII, alpha 1	*
COL4A5	collagen, type IV, alpha 5	*
COL4A6	collagen, type IV, alpha 6	*
COL6A6	collagen, type VI, alpha 6	*
COL9A1	collagen, type IX, alpha 1	*
COMMD7	COMM domain containing 7
COMP	cartilage oligomeric matrix protein
CORO1C	coronin, actin binding protein, 1C
CPN1	carboxypeptidase N, polypeptide 1
CPXM1	carboxypeptidase X (M14 family), member 1
CR1L	complement component (3b/4b) receptor 1-like
CREB3L3	cAMP responsive element binding protein 3-like 3
CRNN	cornulin	*
CRSP8P	mediator complex subunit 27 pseudogene
CRX	cone-rod homeobox	*
CRYBB3	crystallin, beta B3	*
CSAG1	chondrosarcoma associated gene 1	*
CSAG2	CSAG family, member 2	*
CSAG3	CSAG family, member 3	*
CSF2RB	colony stimulating factor 2 receptor, beta, low-affinity (granulocyte-macrophage)
CSHL1	chorionic somatomammotropin hormone-like 1
CSK	c-src tyrosine kinase
CSMD3	CUB and Sushi multiple domains 3	*
CST1	cystatin SN	*
CST11	cystatin 11	*
CST13P	cystatin 13, pseudogene	*
CST2	cystatin SA
CST7	cystatin F (leukocystatin)
CST8	cystatin 8 (cystatin-related epididymal specific)	*
CT45A1	cancer/testis antigen family 45, member A1	*
CT45A2	cancer/testis antigen family 45, member A2	*
CT45A3	cancer/testis antigen family 45, member A3	*
CT45A4	cancer/testis antigen family 45, member A4	*
CT45A5	cancer/testis antigen family 45, member A5	*
CTAG1A	cancer/testis antigen 1A
CTAG1B	cancer/testis antigen 1B
CTAG2	cancer/testis antigen 2
CTAGE11P	CTAGE family, member 11, pseudogene
CTAGE15P	CTAGE family, member 15, pseudogene	*
CTAGE4	CTAGE family, member 4	*
CTAGE6P	CTAGE family, member 6, pseudogene	*
CTXN3	cortexin 3	*
CXCR5	chemokine (C-X-C motif) receptor 5
CXorf27	chromosome X open reading frame 27
CXorf64	chromosome X open reading frame 64	*
CXorf65	chromosome X open reading frame 65	*
CYP19A1	cytochrome P450, family 19, subfamily A, polypeptide 1
CYP2C8	cytochrome P450, family 2, subfamily C, polypeptide 8	*
CYP2J2	cytochrome P450, family 2, subfamily J, polypeptide 2
CYP3A43	cytochrome P450, family 3, subfamily A, polypeptide 43
CYP3A5	cytochrome P450, family 3, subfamily A, polypeptide 5
CYP4A11	cytochrome P450, family 4, subfamily A, polypeptide 11
CYP4F11	cytochrome P450, family 4, subfamily F, polypeptide 11	*
CYP4F3	cytochrome P450, family 4, subfamily F, polypeptide 3	*
CYP4F30P	cytochrome P450, family 4, subfamily F, polypeptide 30, pseudogene	*
CYP4F35P	cytochrome P450, family 4, subfamily F, polypeptide 35, pseudogene	*
CYP4F8	cytochrome P450, family 4, subfamily F, polypeptide 8
CYSLTR2	cysteinyl leukotriene receptor 2
DAO	D-amino-acid oxidase
DAOA	D-amino acid oxidase activator
DAPP1	dual adaptor of phosphotyrosine and 3-phosphoinositides	*
DCAF4L2	DDB1 and CUL4 associated factor 4-like 2
DCAF8L1	DDB1 and CUL4 associated factor 8-like 1
DCX	doublecortin	*
DDC	dopa decarboxylase (aromatic L-amino acid decarboxylase)	*
DDO	D-aspartate oxidase	*
DEAF1	deformed epidermal autoregulatory factor 1 (Drosophila)
DEFB107A	defensin, beta 107A
DEFB107B	defensin, beta 107B
DEFB108B	defensin, beta 108B
DEFB109P1B	defensin, beta 109, pseudogene 1B	*
DEFB119	defensin, beta 119	*
DHDH	dihydrodiol dehydrogenase (dimeric)
DHRS13	dehydrogenase/reductase (SDR family) member 13
DHRS2	dehydrogenase/reductase (SDR family) member 2
DHRS7C	dehydrogenase/reductase (SDR family) member 7C	*
DHRS9	dehydrogenase/reductase (SDR family) member 9	*
DIO1	deiodinase, iodothyronine, type I
DKFZp434J0226	uncharacterized LOC93429
DKFZp434L192	uncharacterized protein DKFZp434L192
DLX6	distal-less homeobox 6
DMBX1	diencephalon/mesencephalon homeobox 1
DNAH5	dynein, axonemal, heavy chain 5	*
DNAH8	dynein, axonemal, heavy chain 8
DNAI1	dynein, axonemal, intermediate chain 1
DNAJB3	DnaJ (Hsp40) homolog, subfamily B, member 3	*
DNAJC5B	DnaJ (Hsp40) homolog, subfamily C, member 5 beta
DNAJC5G	DnaJ (Hsp40) homolog, subfamily C, member 5 gamma
DNALI1	dynein, axonemal, light intermediate chain 1
DNASE1L1	deoxyribonuclease I-like 1
DNASE1L3	deoxyribonuclease I-like 3	*
DPEP2	dipeptidase 2
DPP10	dipeptidyl-peptidase 10 (non-functional)
DPPA3	developmental pluripotency associated 3
DPRX	divergent-paired related homeobox
DRGX	dorsal root ganglia homeobox
DRP2	dystrophin related protein 2	*
DSC1	desmocollin 1
DSG4	desmoglein 4
DUSP21	dual specificity phosphatase 21
DYDC2	DPY30 domain containing 2
DYRK4	dual-specificity tyrosine-(Y)-phosphorylation regulated kinase 4	*
EDF1	endothelial differentiation-related factor 1
EDNRB	endothelin receptor type B	*
EEA1	early endosome antigen 1
EEF1A1P9	eukaryotic translation elongation factor 1 alpha 1 pseudogene 9
EFHB	EF-hand domain family, member B
EGFLAM	EGF-like, fibronectin type III and laminin G domains
EIF3IP1	eukaryotic translation initiation factor 3, subunit I pseudogene 1	*
ELAVL2	ELAV (embryonic lethal, abnormal vision, Drosophila)-like 2 (Hu antigen B)
ELMO1	engulfment and cell motility 1	*
EMR4P	egf-like module containing, mucin-like, hormone receptor-like 4 pseudogene
ENHO	energy homeostasis associated
ENTPD8	ectonucleoside triphosphate diphosphohydrolase 8
ERP27	endoplasmic reticulum protein 27
EXPH5	exophilin 5	*
F12	coagulation factor XII (Hageman factor)
F13A1	coagulation factor XIII, A1 polypeptide	*
FAAH2	fatty acid amide hydrolase 2	*
FAIM3	Fas apoptotic inhibitory molecule 3	*
FAM110A	family with sequence similarity 110, member A
FAM154B	family with sequence similarity 154, member B
FAM159A	family with sequence similarity 159, member A
FAM160B2	family with sequence similarity 160, member B2	*
FAM176A	family with sequence similarity 176, member A
FAM177B	family with sequence similarity 177, member B
FAM182A	family with sequence similarity 182, member A	*
FAM182B	family with sequence similarity 182, member B	*
FAM213B	family with sequence similarity 213, member B
FAM22A	family with sequence similarity 22, member A
FAM27A	family with sequence similarity 27, member A
FAM27C	family with sequence similarity 27, member C
FAM27L	family with sequence similarity 27-like	*
FAM47A	family with sequence similarity 47, member A
FAM47C	family with sequence similarity 47, member C
FAM5B	family with sequence similarity 5, member B	*
FAM65B	family with sequence similarity 65, member B	*
FAM71A	family with sequence similarity 71, member A	*
FAM71C	family with sequence similarity 71, member C
FBLN7	fibulin 7
FBRS	fibrosin
FBXL12	F-box and leucine-rich repeat protein 12
FBXO32	F-box protein 32
FBXW12	F-box and WD repeat domain containing 12	*
FBXW4	F-box and WD repeat domain containing 4
FCER2	Fc fragment of IgE, low affinity II, receptor for (CD23)	*
FCGBP	Fc fragment of IgG binding protein	*
FCGR1A	Fc fragment of IgG, high affinity Ia, receptor (CD64)
FCGR1B	Fc fragment of IgG, high affinity Ib, receptor (CD64)
FCGR1C	Fc fragment of IgG, high affinity Ic, receptor (CD64), pseudogene
FCGR2A	Fc fragment of IgG, low affinity IIa, receptor (CD32)
FCGR2B	Fc fragment of IgG, low affinity IIb, receptor (CD32)	*
FCN1	ficolin (collagen/fibrinogen domain containing) 1
FCRL6	Fc receptor-like 6
FDCSP	follicular dendritic cell secreted protein
FDXR	ferredoxin reductase
FER1L4	fer-1-like 4 (C. elegans) pseudogene
FER1L5	fer-1-like 5 (C. elegans)
FFAR3	free fatty acid receptor 3	*
FGF13	fibroblast growth factor 13	*
FGF22	fibroblast growth factor 22
FGF6	fibroblast growth factor 6	*
FGFR2	fibroblast growth factor receptor 2	*
FKBP1B	FK506 binding protein 1B, 12.6 kDa
FKBP8	FK506 binding protein 8, 38kDa
FLG	filaggrin	*
FLG2	filaggrin family member 2
FLJ33360	FLJ33360 protein	*
FLJ36000	uncharacterized FLJ36000	*
FLJ44635	TPT1-like protein
FMO2	flavin containing monooxygenase 2 (non-functional)
FMO3	flavin containing monooxygenase 3
FOXA1	forkhead box A1
FOXD1	forkhead box D1
FOXD4	forkhead box D4
FOXD4L1	forkhead box D4-like 1	*
FOXD4L2	forkhead box D4-like 2
FOXD4L4	forkhead box D4-like 4
FOXD4L5	forkhead box D4-like 5	*
FOXD4L6	forkhead box D4-like 6
FOXE1	forkhead box E1 (thyroid transcription factor 2)
FOXP3	forkhead box P3	*
FRK	fyn-related kinase
FRMD4A	FERM domain containing 4A	*
FRMPD2	FERM and PDZ domain containing 2	*
FRMPD2P1	FERM and PDZ domain containing 2 pseudogene 1	*
FRMPDP2	FERM and PDZ domain containing 2 pseudogene 2	*
FSCB	fibrous sheath CABYR binding protein
FSCN3	fascin homolog 3, actin-bundling protein, testicular (Strongylocentrotus purpuratus)
FUT1	fucosyltransferase 1 (galactoside 2-alpha-L-fucosyltransferase, H blood group)
FZR1	fizzy/cell division cycle 20 related 1 (Drosophila)
GABRA1	gamma-aminobutyric acid (GABA) A receptor, alpha 1	*
GABRA4	gamma-aminobutyric acid (GABA) A receptor, alpha 4	*
GABRR2	gamma-aminobutyric acid (GABA) A receptor, rho 2
GAGE10	G antigen 10
GATA1	GATA binding protein 1 (globin transcription factor 1)	*
GBP1P1	guanylate binding protein 1, interferon-inducible pseudogene 1	*
GCKR	glucokinase (hexokinase 4) regulator
GCNT1	glucosaminyl (N-acetyl) transferase 1, core 2	*
GCSAML	germinal center-associated, signaling and motility-like
GDPD2	glycerophosphodiester phosphodiesterase domain containing 2	*
GET4	golgi to ER traffic protein 4 homolog (S. cerevisiae)
GGT5	gamma-glutamyltransferase 5
GGTLC1	gamma-glutamyltransferase light chain 1	*
GJA10	gap junction protein, alpha 10, 62kDa	*
GJB1	gap junction protein, beta 1, 32kDa
GK3P	glycerol kinase 3 pseudogene
GLS2	glutaminase 2 (liver, mitochondrial)
GNAI1	guanine nucleotide binding protein (G protein), alpha inhibiting activity polypeptide 1
GNG5	guanine nucleotide binding protein (G protein), gamma 5
GNG7	guanine nucleotide binding protein (G protein), gamma 7
GNRHR2	gonadotropin-releasing hormone (type 2) receptor 2
GOLGA6D	golgin A6 family, member D
GOLGA8IP	golgin A8 family, member I, pseudogene
GOLT1A	golgi transport 1A
GPA33	glycoprotein A33 (transmembrane)	*
GPCPD1	glycerophosphocholine phosphodiesterase GDE1 homolog (S. cerevisiae)
GPIHBP1	glycosylphosphatidylinositol anchored high density lipoprotein binding protein 1
GPKOW	G patch domain and KOW motifs
GPLD1	glycosylphosphatidylinositol specific phospholipase D1	*
GPR110	G protein-coupled receptor 110
GPR116	G protein-coupled receptor 116	*
GPR119	G protein-coupled receptor 119	*
GPR148	G protein-coupled receptor 148
GPR156	G protein-coupled receptor 156
GPR162	G protein-coupled receptor 162	*
GPR32	G protein-coupled receptor 32
GPR52	G protein-coupled receptor 52
GPR84	G protein-coupled receptor 84
GPRC5D	G protein-coupled receptor, family C, group 5, member D
GRIA1	glutamate receptor, ionotropic, AMPA 1	*
GRIA4	glutamate receptor, ionotropic, AMPA 4
GRIN1	glutamate receptor, ionotropic, N-methyl D-aspartate 1
GRIN2B	glutamate receptor, ionotropic, N-methyl D-aspartate 2B	*
GRM1	glutamate receptor, metabotropic 1
GRM5	glutamate receptor, metabotropic 5	*
GRM8	glutamate receptor, metabotropic 8
GSG1L	GSG1-like
GSTM2P1	glutathione S-transferase mu 2 (muscle) pseudogene 1
GTF2IRD1	GTF2I repeat domain containing 1
GTSF1L	gametocyte specific factor 1-like	*
GUCA1B	guanylate cyclase activator 1B (retina)
GUCY1B2	guanylate cyclase 1, soluble, beta 2 (pseudogene)
H19	H19, imprinted maternally expressed transcript (non-protein coding)
H2BFWT	H2B histone family, member W, testis-specific
HAPLN2	hyaluronan and proteoglycan link protein 2
HAPLN4	hyaluronan and proteoglycan link protein 4
HAVCR2	hepatitis A virus cellular receptor 2	*
HBB	hemoglobin, beta
HBBP1	hemoglobin, beta pseudogene 1	*
HBD	hemoglobin, delta	*
HBE1	hemoglobin, epsilon 1
HBG2	hemoglobin, gamma G
HCAR2	hydroxycarboxylic acid receptor 2
HCAR3	hydroxycarboxylic acid receptor 3
HCG9	HLA complex group 9 (non-protein coding)	*
HEATR2	HEAT repeat containing 2
HEATR7B2	HEAT repeat family member 7B2
HEMGN	hemogen
HEPACAM	hepatic and glial cell adhesion molecule	*
HEPACAM2	HEPACAM family member 2
HERPUD1	homocysteine-inducible, endoplasmic reticulum stress-inducible, ubiquitin-like domain member 1	*
HES6	hairy and enhancer of split 6 (Drosophila)
HESX1	HESX homeobox 1	*
HGD	homogentisate 1,2-dioxygenase
HIGD1A	HIG1 hypoxia inducible domain family, member 1A
HLA-DOA	major histocompatibility complex, class II, DO alpha
HLA-F-AS1	HLA-F antisense RNA 1	*
HOTAIR	HOX transcript antisense RNA
HSD3B7	hydroxy-delta-5-steroid dehydrogenase, 3 beta- and steroid delta-isomerase 7
HSPB1P1	heat shock 27kDa protein 1 pseudogene 1
HSPB3	heat shock 27kDa protein 3
HTA	uncharacterized LOC283902
HTR1D	5-hydroxytryptamine (serotonin) receptor 1D, G protein-coupled
HTR1F	5-hydroxytryptamine (serotonin) receptor 1F, G protein-coupled
HTR3A	5-hydroxytryptamine (serotonin) receptor 3A, ionotropic	*
HTR3D	5-hydroxytryptamine (serotonin) receptor 3D, ionotropic
ICAM2	intercellular adhesion molecule 2
IDO2	indoleamine 2,3-dioxygenase 2
IFIT1B	interferon-induced protein with tetratricopeptide repeats 1B
IFNA17	interferon, alpha 17
IFNA4	interferon, alpha 4
IFNA7	interferon, alpha 7
IGFBP4	insulin-like growth factor binding protein 4
IGSF1	immunoglobulin superfamily, member 1	*
IGSF5	immunoglobulin superfamily, member 5	*
IL16	interleukin 16	*
IL17RE	interleukin 17 receptor E
IL27	interleukin 27
IL28A	interleukin 28A (interferon, lambda 2)
IL29	interleukin 29 (interferon, lambda 1)	*
IL34	interleukin 34
IL36G	interleukin 36, gamma	*
IL36RN	interleukin 36 receptor antagonist	*
IL3RA	interleukin 3 receptor, alpha (low affinity)
IMPDH1	IMP (inosine 5'-monophosphate) dehydrogenase 1
INTS4L1	integrator complex subunit 4-like 1
INTS4L2	integrator complex subunit 4-like 2
IQCF1	IQ motif containing F1	*
IQCF3	IQ motif containing F3	*
IQSEC1	IQ motif and Sec7 domain 1
IQSEC2	IQ motif and Sec7 domain 2
ISCA1P1	iron-sulfur cluster assembly 1 homolog (S. cerevisiae) pseudogene 1
ISYNA1	inositol-3-phosphate synthase 1
ITGA2B	integrin, alpha 2b (platelet glycoprotein IIb of IIb/IIIa complex, antigen CD41)	*
ITGB1BP2	integrin beta 1 binding protein (melusin) 2	*
ITIH3	inter-alpha-trypsin inhibitor heavy chain 3
ITIH5	inter-alpha-trypsin inhibitor heavy chain family, member 5
ITLN1	intelectin 1 (galactofuranose binding)
IVL	involucrin
KBTBD10	kelch repeat and BTB (POZ) domain containing 10
KCNA10	potassium voltage-gated channel, shaker-related subfamily, member 10	*
KCNH2	potassium voltage-gated channel, subfamily H (eag-related), member 2
KCNH5	potassium voltage-gated channel, subfamily H (eag-related), member 5	*
KCNIP1	Kv channel interacting protein 1	*
KCNIP2	Kv channel interacting protein 2
KCNIP4	Kv channel interacting protein 4	*
KCNJ16	potassium inwardly-rectifying channel, subfamily J, member 16
KCNJ4	potassium inwardly-rectifying channel, subfamily J, member 4
KCNK16	potassium channel, subfamily K, member 16	*
KCNMB2	potassium large conductance calcium-activated channel, subfamily M, beta member 2	*
KCNN2	potassium intermediate/small conductance calcium-activated channel, subfamily N, member 2
KCNN4	potassium intermediate/small conductance calcium-activated channel, subfamily N, member 4	*
KCNT1	potassium channel, subfamily T, member 1
KGFLP1	fibroblast growth factor 7 pseudogene
KIAA0930	KIAA0930
KIAA1210	KIAA1210	*
KIAA1671	KIAA1671	*
KIAA1984	KIAA1984
KIF4B	kinesin family member 4B	*
KIR2DL1	killer cell immunoglobulin-like receptor, two domains, long cytoplasmic tail, 1	*
KIR2DL2	killer cell immunoglobulin-like receptor, two domains, long cytoplasmic tail, 2	*
KIR2DL3	killer cell immunoglobulin-like receptor, two domains, long cytoplasmic tail, 3	*
KIR3DL1	killer cell immunoglobulin-like receptor, three domains, long cytoplasmic tail, 1	*
KIR3DX1	killer cell immunoglobulin-like receptor, three domains, X1
KLF2	Kruppel-like factor 2 (lung)
KLHL4	kelch-like 4 (Drosophila)
KLK12	kallikrein-related peptidase 12	*
KLK4	kallikrein-related peptidase 4	*
KLRC3	killer cell lectin-like receptor subfamily C, member 3
KLRD1	killer cell lectin-like receptor subfamily D, member 1	*
KLRF1	killer cell lectin-like receptor subfamily F, member 1
KRT1	keratin 1	*
KRT10	keratin 10
KRT12	keratin 12
KRT16	keratin 16
KRT18	keratin 18
KRT2	keratin 2
KRT24	keratin 24
KRT3	keratin 3
KRT5	keratin 5
KRT6A	keratin 6A
KRT6B	keratin 6B
KRT6C	keratin 6C
KRT75	keratin 75
KRT76	keratin 76
KRT77	keratin 77
KRT79	keratin 79
KRT84	keratin 84	*
KRT9	keratin 9
KRTAP10-1	keratin associated protein 10-1	*
KRTAP10-10	keratin associated protein 10-10	*
KRTAP10-11	keratin associated protein 10-11	*
KRTAP10-9	keratin associated protein 10-9
KRTAP12-2	keratin associated protein 12-2
KRTAP19-7	keratin associated protein 19-7
KRTAP21-2	keratin associated protein 21-2
KRTAP26-1	keratin associated protein 26-1
KRTAP4-12	keratin associated protein 4-12
KRTAP4-4	keratin associated protein 4-4
KRTAP4-7	keratin associated protein 4-7
KRTAP4-8	keratin associated protein 4-8
KRTAP4-9	keratin associated protein 4-9
KRTAP5-11	keratin associated protein 5-11	*
KRTAP5-4	keratin associated protein 5-4	*
KRTAP5-5	keratin associated protein 5-5	*
KRTAP6-1	keratin associated protein 6-1
KRTAP6-2	keratin associated protein 6-2
KRTAP6-3	keratin associated protein 6-3
KRTAP7-1	keratin associated protein 7-1 (gene/pseudogene)
KRTAP8-1	keratin associated protein 8-1
KRTAP9-3	keratin associated protein 9-3
KRTAP9-9	keratin associated protein 9-9
LACC1	laccase (multicopper oxidoreductase) domain containing 1	*
LAMA3	laminin, alpha 3
LAMP2	lysosomal-associated membrane protein 2
LAT2	linker for activation of T cells family, member 2
LCE1B	late cornified envelope 1B
LCE1D	late cornified envelope 1D	*
LCE2A	late cornified envelope 2A	*
LCE2C	late cornified envelope 2C	*
LCE2D	late cornified envelope 2D	*
LCE3D	late cornified envelope 3D
LCE5A	late cornified envelope 5A
LCN10	lipocalin 10
LCN6	lipocalin 6
LCP2	lymphocyte cytosolic protein 2 (SH2 domain containing leukocyte protein of 76kDa)	*
LCT	lactase
LDLRAD1	low density lipoprotein receptor class A domain containing 1
LGI1	leucine-rich, glioma inactivated 1	*
LGI2	leucine-rich repeat LGI family, member 2
LHFPL1	lipoma HMGIC fusion partner-like 1
LHX6	LIM homeobox 6
LIFR	leukemia inhibitory factor receptor alpha	*
LIG1	ligase I, DNA, ATP-dependent
LILRA2	leukocyte immunoglobulin-like receptor, subfamily A (with TM domain), member 2	*
LILRA4	leukocyte immunoglobulin-like receptor, subfamily A (with TM domain), member 4	*
LILRB4	leukocyte immunoglobulin-like receptor, subfamily B (with TM and ITIM domains), member 4	*
LINC00032	long intergenic non-protein coding RNA 32
LINC00085	long intergenic non-protein coding RNA 85
LINC00114	long intergenic non-protein coding RNA 114	*
LINC00202	long intergenic non-protein coding RNA 202	*
LINC00239	long intergenic non-protein coding RNA 239	*
LINC00320	long intergenic non-protein coding RNA 320
LINC00469	long intergenic non-protein coding RNA 469	*
LINC00470	long intergenic non-protein coding RNA 470
LINC00477	long intergenic non-protein coding RNA 477
LINC00483	long intergenic non-protein coding RNA 483
LINC00488	long intergenic non-protein coding RNA 488
LIPE	lipase, hormone-sensitive
LMAN1L	lectin, mannose-binding, 1 like
LOC100129055	cyclin Y-like pseudogene	*
LOC100129550	uncharacterized LOC100129550	*
LOC100131726	HCC-related HCC-C11_v3
LOC100133669	uncharacterized LOC100133669
LOC100134259	uncharacterized LOC100134259
LOC100134868	uncharacterized LOC100134868
LOC145845	uncharacterized LOC145845
LOC146481	FSHD region gene 2 family, member C pseudogene
LOC148709	actin pseudogene
LOC152024	uncharacterized LOC152024
LOC283174	uncharacterized LOC283174	*
LOC284379	solute carrier family 7 (cationic amino acid transporter, y+ system), member 3 pseudogene	*
LOC284441	actin-related protein 2 pseudogene
LOC284837	uncharacterized LOC284837
LOC285359	phosducin-like 3 pseudogene
LOC285501	uncharacterized LOC285501
LOC285629	uncharacterized LOC285629	*
LOC339240	keratin 17 pseudogene	*
LOC341056	SUMO1 activating enzyme subunit 1 pseudogene
LOC441455	makorin ring finger protein 1 pseudogene	*
LOC442308	tubulin, beta class I pseudogene
LOC541473	FK506 binding protein 6, 36kDa pseudogene	*
LOC553137	uncharacterized LOC553137
LOC645166	lymphocyte-specific protein 1 pseudogene	*
LOC647859	occludin pseudogene	*
LOC650293	seven transmembrane helix receptor	*
LOC728643	heterogeneous nuclear ribonucleoprotein A1 pseudogene
LOC728989	phosphodiesterase 4D interacting protein pseudogene	*
LOC730811	uncharacterized LOC730811	*
LOC731789	uncharacterized LOC731789	*
LPAL2	lipoprotein, Lp(a)-like 2, pseudogene
LPHN1	latrophilin 1
LPPR1	lipid phosphate phosphatase-related protein type 1	*
LRIT1	leucine-rich repeat, immunoglobulin-like and transmembrane domains 1	*
LRIT3	leucine-rich repeat, immunoglobulin-like and transmembrane domains 3
LRP5L	low density lipoprotein receptor-related protein 5-like	*
LRRC2	leucine rich repeat containing 2	*
LRRC52	leucine rich repeat containing 52	*
LRRC69	leucine rich repeat containing 69	*
LRRIQ4	leucine-rich repeats and IQ motif containing 4
LSM14B	LSM14B, SCD6 homolog B (S. cerevisiae)
LUZP4	leucine zipper protein 4
LY6G6E	lymphocyte antigen 6 complex, locus G6E (pseudogene)
LY9	lymphocyte antigen 9	*
LYPD4	LY6/PLAUR domain containing 4	*
LYPD8	LY6/PLAUR domain containing 8	*
MAF	v-maf musculoaponeurotic fibrosarcoma oncogene homolog (avian)
MAG	myelin associated glycoprotein
MAGEA2B	melanoma antigen family A, 2B	*
MAGEB1	melanoma antigen family B, 1	*
MAGEC3	melanoma antigen family C, 3
MAK	male germ cell-associated kinase
MAMLD1	mastermind-like domain containing 1
MAN1C1	mannosidase, alpha, class 1C, member 1
MAP1LC3A	microtubule-associated protein 1 light chain 3 alpha
MAPK10	mitogen-activated protein kinase 10	*
MARCH8	membrane-associated ring finger (C3HC4) 8, E3 ubiquitin protein ligase
MARCO	macrophage receptor with collagenous structure	*
MARVELD3	MARVEL domain containing 3	*
MAS1	MAS1 oncogene	*
MC4R	melanocortin 4 receptor
MCF2	MCF.2 cell line derived transforming sequence
MED12	mediator complex subunit 12
MEG8	maternally expressed 8 (non-protein coding)	*
MEGF10	multiple EGF-like-domains 10
MEGF6	multiple EGF-like-domains 6
METTL10	methyltransferase like 10
METTL20	methyltransferase like 20	*
MGC15885	uncharacterized protein MGC15885
MGC70870	C-terminal binding protein 2 pseudogene	*
MLC1	megalencephalic leukoencephalopathy with subcortical cysts 1	*
MMRN1	multimerin 1
MOB1B	MOB kinase activator 1B
MOGAT2	monoacylglycerol O-acyltransferase 2
MORN4	MORN repeat containing 4
MPZL2	myelin protein zero-like 2	*
MS4A10	membrane-spanning 4-domains, subfamily A, member 10
MS4A14	membrane-spanning 4-domains, subfamily A, member 14	*
MS4A15	membrane-spanning 4-domains, subfamily A, member 15	*
MS4A4A	membrane-spanning 4-domains, subfamily A, member 4A	*
MSC	musculin
MTA2	metastasis associated 1 family, member 2
MTUS2	microtubule associated tumor suppressor candidate 2	*
MUC16	mucin 16, cell surface associated
MUC20	mucin 20, cell surface associated	*
MUC5AC	mucin 5AC, oligomeric mucus/gel-forming
MYBPHL	myosin binding protein H-like
MYCBP2	MYC binding protein 2, E3 ubiquitin protein ligase
MYF5	myogenic factor 5	*
MYH6	myosin, heavy chain 6, cardiac muscle, alpha	*
MYL2	myosin, light chain 2, regulatory, cardiac, slow
MYL7	myosin, light chain 7, regulatory
MYLK3	myosin light chain kinase 3
MYO1C	myosin IC
MYO1H	myosin IH
NACA2	nascent polypeptide-associated complex alpha subunit 2	*
NAIP	NLR family, apoptosis inhibitory protein	*
NANOGNB	NANOG neighbor homeobox
NAV1	neuron navigator 1
NBL1	neuroblastoma, suppression of tumorigenicity 1
NBPF11	neuroblastoma breakpoint family, member 11
NBPF24	neuroblastoma breakpoint family, member 24
NBPF7	neuroblastoma breakpoint family, member 7	*
NCF2	neutrophil cytosolic factor 2	*
NCLN	nicalin	*
NDRG4	NDRG family member 4	*
NDST4	N-deacetylase/N-sulfotransferase (heparan glucosaminyl) 4
NEBL	nebulette	*
NEK10	NIMA (never in mitosis gene a)- related kinase 10
NHLH1	nescient helix loop helix 1	*
NKAIN1	Na+/K+ transporting ATPase interacting 1
NKD1	naked cuticle homolog 1 (Drosophila)
NLRP2	NLR family, pyrin domain containing 2	*
NLRP9	NLR family, pyrin domain containing 9
NME8	NME/NM23 family member 8
NOX4	NADPH oxidase 4
NPC1L1	NPC1 (Niemann-Pick disease, type C1, gene)-like 1
NPFFR2	neuropeptide FF receptor 2	*
NPW	neuropeptide W
NR1I2	nuclear receptor subfamily 1, group I, member 2	*
NR2C2	nuclear receptor subfamily 2, group C, member 2
NSDHL	NAD(P) dependent steroid dehydrogenase-like
NSG1	neuron specific gene family member 1
NT5DC3	5'-nucleotidase domain containing 3
NTM	neurotrimin	*
NUMB	numb homolog (Drosophila)
NXF2	nuclear RNA export factor 2	*
NXPE1	neurexophilin and PC-esterase domain family, member 1
NXPE4	neurexophilin and PC-esterase domain family, member 4
OCSTAMP	osteoclast stimulatory transmembrane protein
ODZ2	odz, odd Oz/ten-m homolog 2 (Drosophila)	*
OLFM4	olfactomedin 4	*
OPN1MW	opsin 1 (cone pigments), medium-wave-sensitive
OPN1MW2	opsin 1 (cone pigments), medium-wave-sensitive 2
OR10A2	olfactory receptor, family 10, subfamily A, member 2
OR10A4	olfactory receptor, family 10, subfamily A, member 4	*
OR10A6	olfactory receptor, family 10, subfamily A, member 6	*
OR10A7	olfactory receptor, family 10, subfamily A, member 7
OR10C1	olfactory receptor, family 10, subfamily C, member 1
OR10G3	olfactory receptor, family 10, subfamily G, member 3
OR10H5	olfactory receptor, family 10, subfamily H, member 5
OR10K1	olfactory receptor, family 10, subfamily K, member 1
OR10Q1	olfactory receptor, family 10, subfamily Q, member 1
OR10T2	olfactory receptor, family 10, subfamily T, member 2
OR10W1	olfactory receptor, family 10, subfamily W, member 1
OR10X1	olfactory receptor, family 10, subfamily X, member 1
OR11G2	olfactory receptor, family 11, subfamily G, member 2
OR11H1	olfactory receptor, family 11, subfamily H, member 1	*
OR11H12	olfactory receptor, family 11, subfamily H, member 12
OR12D2	olfactory receptor, family 12, subfamily D, member 2
OR12D3	olfactory receptor, family 12, subfamily D, member 3
OR13C2	olfactory receptor, family 13, subfamily C, member 2
OR13C5	olfactory receptor, family 13, subfamily C, member 5
OR13C9	olfactory receptor, family 13, subfamily C, member 9
OR13D1	olfactory receptor, family 13, subfamily D, member 1	*
OR13F1	olfactory receptor, family 13, subfamily F, member 1
OR14C36	olfactory receptor, family 14, subfamily C, member 36
OR14I1	olfactory receptor, family 14, subfamily I, member 1
OR14J1	olfactory receptor, family 14, subfamily J, member 1
OR1A1	olfactory receptor, family 1, subfamily A, member 1	*
OR1D2	olfactory receptor, family 1, subfamily D, member 2
OR1E1	olfactory receptor, family 1, subfamily E, member 1
OR1F1	olfactory receptor, family 1, subfamily F, member 1
OR1F2P	olfactory receptor, family 1, subfamily F, member 2
OR1J1	olfactory receptor, family 1, subfamily J, member 1
OR1J4	olfactory receptor, family 1, subfamily J, member 4	*
OR1K1	olfactory receptor, family 1, subfamily K, member 1	*
OR1L3	olfactory receptor, family 1, subfamily L, member 3	*
OR1L6	olfactory receptor, family 1, subfamily L, member 6
OR1Q1	olfactory receptor, family 1, subfamily Q, member 1
OR2A1	olfactory receptor, family 2, subfamily A, member 1
OR2A12	olfactory receptor, family 2, subfamily A, member 12
OR2A14	olfactory receptor, family 2, subfamily A, member 14
OR2A2	olfactory receptor, family 2, subfamily A, member 2
OR2A20P	olfactory receptor, family 2, subfamily A, member 20 pseudogene
OR2A25	olfactory receptor, family 2, subfamily A, member 25
OR2A4	olfactory receptor, family 2, subfamily A, member 4
OR2A42	olfactory receptor, family 2, subfamily A, member 42
OR2A7	olfactory receptor, family 2, subfamily A, member 7
OR2A9P	olfactory receptor, family 2, subfamily A, member 9 pseudogene
OR2AE1	olfactory receptor, family 2, subfamily AE, member 1
OR2AG1	olfactory receptor, family 2, subfamily AG, member 1	*
OR2AK2	olfactory receptor, family 2, subfamily AK, member 2	*
OR2B2	olfactory receptor, family 2, subfamily B, member 2
OR2B3	olfactory receptor, family 2, subfamily B, member 3
OR2B6	olfactory receptor, family 2, subfamily B, member 6
OR2C3	olfactory receptor, family 2, subfamily C, member 3	*
OR2D3	olfactory receptor, family 2, subfamily D, member 3
OR2F1	olfactory receptor, family 2, subfamily F, member 1
OR2F2	olfactory receptor, family 2, subfamily F, member 2
OR2G2	olfactory receptor, family 2, subfamily G, member 2	*
OR2J2	olfactory receptor, family 2, subfamily J, member 2
OR2J3	olfactory receptor, family 2, subfamily J, member 3	*
OR2L1P	olfactory receptor, family 2, subfamily L, member 1 pseudogene
OR2L2	olfactory receptor, family 2, subfamily L, member 2
OR2L3	olfactory receptor, family 2, subfamily L, member 3
OR2L8	olfactory receptor, family 2, subfamily L, member 8
OR2T10	olfactory receptor, family 2, subfamily T, member 10	*
OR2T12	olfactory receptor, family 2, subfamily T, member 12
OR2T8	olfactory receptor, family 2, subfamily T, member 8
OR2W1	olfactory receptor, family 2, subfamily W, member 1
OR4A15	olfactory receptor, family 4, subfamily A, member 15
OR4A16	olfactory receptor, family 4, subfamily A, member 16
OR4A47	olfactory receptor, family 4, subfamily A, member 47	*
OR4B1	olfactory receptor, family 4, subfamily B, member 1	*
OR4C12	olfactory receptor, family 4, subfamily C, member 12	*
OR4C13	olfactory receptor, family 4, subfamily C, member 13	*
OR4C15	olfactory receptor, family 4, subfamily C, member 15
OR4C16	olfactory receptor, family 4, subfamily C, member 16
OR4C45	olfactory receptor, family 4, subfamily C, member 45	*
OR4C46	olfactory receptor, family 4, subfamily C, member 46	*
OR4C6	olfactory receptor, family 4, subfamily C, member 6	*
OR4D1	olfactory receptor, family 4, subfamily D, member 1	*
OR4D11	olfactory receptor, family 4, subfamily D, member 11	*
OR4D2	olfactory receptor, family 4, subfamily D, member 2	*
OR4F17	olfactory receptor, family 4, subfamily F, member 17
OR4F4	olfactory receptor, family 4, subfamily F, member 4
OR4F5	olfactory receptor, family 4, subfamily F, member 5
OR4K14	olfactory receptor, family 4, subfamily K, member 14
OR4K15	olfactory receptor, family 4, subfamily K, member 15
OR4K17	olfactory receptor, family 4, subfamily K, member 17
OR4K2	olfactory receptor, family 4, subfamily K, member 2	*
OR4K5	olfactory receptor, family 4, subfamily K, member 5	*
OR4L1	olfactory receptor, family 4, subfamily L, member 1	*
OR4N2	olfactory receptor, family 4, subfamily N, member 2
OR4N4	olfactory receptor, family 4, subfamily N, member 4	*
OR4N5	olfactory receptor, family 4, subfamily N, member 5
OR4P4	olfactory receptor, family 4, subfamily P, member 4
OR4Q3	olfactory receptor, family 4, subfamily Q, member 3
OR51A2	olfactory receptor, family 51, subfamily A, member 2	*
OR51A7	olfactory receptor, family 51, subfamily A, member 7
OR51B2	olfactory receptor, family 51, subfamily B, member 2
OR51B5	olfactory receptor, family 51, subfamily B, member 5
OR51B6	olfactory receptor, family 51, subfamily B, member 6	*
OR51E1	olfactory receptor, family 51, subfamily E, member 1	*
OR51F1	olfactory receptor, family 51, subfamily F, member 1	*
OR51F2	olfactory receptor, family 51, subfamily F, member 2
OR51M1	olfactory receptor, family 51, subfamily M, member 1	*
OR51V1	olfactory receptor, family 51, subfamily V, member 1
OR52A1	olfactory receptor, family 52, subfamily A, member 1	*
OR52A4	olfactory receptor, family 52, subfamily A, member 4
OR52A5	olfactory receptor, family 52, subfamily A, member 5
OR52D1	olfactory receptor, family 52, subfamily D, member 1	*
OR52E4	olfactory receptor, family 52, subfamily E, member 4	*
OR52E6	olfactory receptor, family 52, subfamily E, member 6
OR52E8	olfactory receptor, family 52, subfamily E, member 8
OR52K1	olfactory receptor, family 52, subfamily K, member 1	*
OR52L1	olfactory receptor, family 52, subfamily L, member 1	*
OR52N2	olfactory receptor, family 52, subfamily N, member 2
OR52N4	olfactory receptor, family 52, subfamily N, member 4
OR52R1	olfactory receptor, family 52, subfamily R, member 1	*
OR56B1	olfactory receptor, family 56, subfamily B, member 1
OR56B4	olfactory receptor, family 56, subfamily B, member 4
OR5AC2	olfactory receptor, family 5, subfamily AC, member 2
OR5AK2	olfactory receptor, family 5, subfamily AK, member 2
OR5AR1	olfactory receptor, family 5, subfamily AR, member 1	*
OR5AS1	olfactory receptor, family 5, subfamily AS, member 1
OR5AU1	olfactory receptor, family 5, subfamily AU, member 1	*
OR5B12	olfactory receptor, family 5, subfamily B, member 12
OR5B2	olfactory receptor, family 5, subfamily B, member 2
OR5B21	olfactory receptor, family 5, subfamily B, member 21
OR5B3	olfactory receptor, family 5, subfamily B, member 3
OR5D13	olfactory receptor, family 5, subfamily D, member 13
OR5D14	olfactory receptor, family 5, subfamily D, member 14	*
OR5D16	olfactory receptor, family 5, subfamily D, member 16	*
OR5D18	olfactory receptor, family 5, subfamily D, member 18	*
OR5F1	olfactory receptor, family 5, subfamily F, member 1
OR5I1	olfactory receptor, family 5, subfamily I, member 1
OR5J2	olfactory receptor, family 5, subfamily J, member 2
OR5K1	olfactory receptor, family 5, subfamily K, member 1	*
OR5K4	olfactory receptor, family 5, subfamily K, member 4
OR5L1	olfactory receptor, family 5, subfamily L, member 1
OR5L2	olfactory receptor, family 5, subfamily L, member 2	*
OR5M11	olfactory receptor, family 5, subfamily M, member 11
OR5M8	olfactory receptor, family 5, subfamily M, member 8
OR5M9	olfactory receptor, family 5, subfamily M, member 9	*
OR5P2	olfactory receptor, family 5, subfamily P, member 2	*
OR5P3	olfactory receptor, family 5, subfamily P, member 3	*
OR5T1	olfactory receptor, family 5, subfamily T, member 1
OR5T2	olfactory receptor, family 5, subfamily T, member 2
OR5V1	olfactory receptor, family 5, subfamily V, member 1	*
OR5W2	olfactory receptor, family 5, subfamily W, member 2
OR6C1	olfactory receptor, family 6, subfamily C, member 1
OR6C2	olfactory receptor, family 6, subfamily C, member 2
OR6C3	olfactory receptor, family 6, subfamily C, member 3
OR6C4	olfactory receptor, family 6, subfamily C, member 4
OR6C65	olfactory receptor, family 6, subfamily C, member 65
OR6C76	olfactory receptor, family 6, subfamily C, member 76
OR6K3	olfactory receptor, family 6, subfamily K, member 3	*
OR6Q1	olfactory receptor, family 6, subfamily Q, member 1
OR6S1	olfactory receptor, family 6, subfamily S, member 1	*
OR6X1	olfactory receptor, family 6, subfamily X, member 1	*
OR7D2	olfactory receptor, family 7, subfamily D, member 2	*
OR7D4	olfactory receptor, family 7, subfamily D, member 4	*
OR7E156P	olfactory receptor, family 7, subfamily E, member 156 pseudogene
OR7E24	olfactory receptor, family 7, subfamily E, member 24	*
OR7G2	olfactory receptor, family 7, subfamily G, member 2
OR7G3	olfactory receptor, family 7, subfamily G, member 3
OR8G1	olfactory receptor, family 8, subfamily G, member 1
OR8G2	olfactory receptor, family 8, subfamily G, member 2
OR8G5	olfactory receptor, family 8, subfamily G, member 5
OR8H1	olfactory receptor, family 8, subfamily H, member 1
OR8H2	olfactory receptor, family 8, subfamily H, member 2
OR8H3	olfactory receptor, family 8, subfamily H, member 3
OR8I2	olfactory receptor, family 8, subfamily I, member 2
OR8J1	olfactory receptor, family 8, subfamily J, member 1	*
OR8K1	olfactory receptor, family 8, subfamily K, member 1
OR8K5	olfactory receptor, family 8, subfamily K, member 5
OR8S1	olfactory receptor, family 8, subfamily S, member 1
OR8U1	olfactory receptor, family 8, subfamily U, member 1
OR8U8	olfactory receptor, family 8, subfamily U, member 8
OR9G1	olfactory receptor, family 9, subfamily G, member 1	*
OR9G9	olfactory receptor, family 9, subfamily G, member 9	*
OR9K2	olfactory receptor, family 9, subfamily K, member 2
ORM1	orosomucoid 1
OSM	oncostatin M
OTOA	otoancorin	*
OTOF	otoferlin
OTOP2	otopetrin 2
OTUD1	OTU domain containing 1
OVCH1	ovochymase 1	*
P2RX6P	purinergic receptor P2X, ligand-gated ion channel, 6 pseudogene
PAGE1	P antigen family, member 1 (prostate associated)
PAGE2	P antigen family, member 2 (prostate associated)
PAGE2B	P antigen family, member 2B
PAGE3	P antigen family, member 3 (prostate associated)	*
PAGE5	P antigen family, member 5 (prostate associated)
PAK3	p21 protein (Cdc42/Rac)-activated kinase 3	*
PAPPA2	pappalysin 2	*
PAQR5	progestin and adipoQ receptor family member V	*
PART1	prostate androgen-regulated transcript 1 (non-protein coding)
PATE2	prostate and testis expressed 2	*
PCBP4	poly(rC) binding protein 4
PCDH15	protocadherin-related 15
PCDHA1	protocadherin alpha 1	*
PCDHA10	protocadherin alpha 10
PCDHA12	protocadherin alpha 12
PCDHA2	protocadherin alpha 2
PCDHA4	protocadherin alpha 4
PCDHA7	protocadherin alpha 7
PCDHA8	protocadherin alpha 8
PCDHB10	protocadherin beta 10
PCDHB11	protocadherin beta 11
PCDHB13	protocadherin beta 13
PCDHB19P	protocadherin beta 19 pseudogene
PCDHB4	protocadherin beta 4
PCDHB5	protocadherin beta 5
PCDHB7	protocadherin beta 7
PCDHB8	protocadherin beta 8
PCDHB9	protocadherin beta 9
PCP4	Purkinje cell protein 4	*
PDE11A	phosphodiesterase 11A	*
PDE6B	phosphodiesterase 6B, cGMP-specific, rod, beta	*
PDE6C	phosphodiesterase 6C, cGMP-specific, cone, alpha prime
PDHA2	pyruvate dehydrogenase (lipoamide) alpha 2	*
PDPN	podoplanin
PDZD3	PDZ domain containing 3
PDZD4	PDZ domain containing 4
PDZK1P1	PDZ domain containing 1 pseudogene 1
PDZRN4	PDZ domain containing ring finger 4
PEBP4	phosphatidylethanolamine-binding protein 4
PEG3-AS1	PEG3 antisense RNA 1	*
PFN1P2	profilin 1 pseudogene 2
PGAM4	phosphoglycerate mutase family member 4
PGLYRP4	peptidoglycan recognition protein 4
PHF21A	PHD finger protein 21A
PHGR1	proline/histidine/glycine-rich 1
PI3	peptidase inhibitor 3, skin-derived	*
PICALM	phosphatidylinositol binding clathrin assembly protein
PIH1D3	PIH1 domain containing 3
PIK3C2B	phosphatidylinositol-4-phosphate 3-kinase, catalytic subunit type 2 beta
PIK3C2G	phosphatidylinositol-4-phosphate 3-kinase, catalytic subunit type 2 gamma
PIPOX	pipecolic acid oxidase
PIPSL	PIP5K1A and PSMD4-like, pseudogene
PISRT1	polled intersex syndrome regulated transcript 1 (non-protein coding RNA)	*
PITPNA	phosphatidylinositol transfer protein, alpha
PITPNM1	phosphatidylinositol transfer protein, membrane-associated 1
PKHD1L1	polycystic kidney and hepatic disease 1 (autosomal recessive)-like 1
PLA1A	phospholipase A1 member A
PLA2G12B	phospholipase A2, group XIIB
PLA2G2D	phospholipase A2, group IID	*
PLA2G2E	phospholipase A2, group IIE	*
PLCL1	phospholipase C-like 1
PLCXD3	phosphatidylinositol-specific phospholipase C, X domain containing 3
PLEC	plectin
PLEKHG6	pleckstrin homology domain containing, family G (with RhoGef domain) member 6
PLEKHH3	pleckstrin homology domain containing, family H (with MyTH4 domain) member 3
PLGLA	plasminogen-like A	*
PLXNB3	plexin B3
PNLIPRP2	pancreatic lipase-related protein 2	*
PNRC1	proline-rich nuclear receptor coactivator 1
POF1B	premature ovarian failure, 1B
POFUT2	protein O-fucosyltransferase 2
POPDC2	popeye domain containing 2
POTEA	POTE ankyrin domain family, member A	*
POU3F1	POU class 3 homeobox 1
PPBP	pro-platelet basic protein (chemokine (C-X-C motif) ligand 7)
PPIP5K1	diphosphoinositol pentakisphosphate kinase 1
PPP1R18	protein phosphatase 1, regulatory subunit 18
PPP2CA	protein phosphatase 2, catalytic subunit, alpha isozyme
PRAMEF16	PRAME family member 16	*
PRAMEF17	PRAME family member 17	*
PRAMEF18	PRAME family member 18	*
PRAMEF19	PRAME family member 19	*
PRAMEF21	PRAME family member 21	*
PRAMEF7	PRAME family member 7	*
PRG2	proteoglycan 2, bone marrow (natural killer cell activator, eosinophil granule major basic protein)
PRH2	proline-rich protein HaeIII subfamily 2	*
PRKAG3	protein kinase, AMP-activated, gamma 3 non-catalytic subunit
PRPF18	PRP18 pre-mRNA processing factor 18 homolog (S. cerevisiae)
PRPH2	peripherin 2 (retinal degeneration, slow)
PRPS1L1	phosphoribosyl pyrophosphate synthetase 1-like 1
PRR4	proline rich 4 (lacrimal)	*
PRRT4	proline-rich transmembrane protein 4
PRSS16	protease, serine, 16 (thymus)
PRSS45	protease, serine, 45
PSG10P	pregnancy specific beta-1-glycoprotein 10, pseudogene	*
PSG2	pregnancy specific beta-1-glycoprotein 2	*
PSG3	pregnancy specific beta-1-glycoprotein 3	*
PSG5	pregnancy specific beta-1-glycoprotein 5	*
PSG6	pregnancy specific beta-1-glycoprotein 6	*
PSG7	pregnancy specific beta-1-glycoprotein 7 (gene/pseudogene)	*
PSMA8	proteasome (prosome, macropain) subunit, alpha type, 8
PTH2	parathyroid hormone 2
PTN	pleiotrophin	*
PTPRE	protein tyrosine phosphatase, receptor type, E	*
QSOX1	quiescin Q6 sulfhydryl oxidase 1
RAB3B	RAB3B, member RAS oncogene family
RAB3C	RAB3C, member RAS oncogene family
RAB40B	RAB40B, member RAS oncogene family	*
RAET1L	retinoic acid early transcript 1L
RAP1GAP	RAP1 GTPase activating protein
RAP1GAP2	RAP1 GTPase activating protein 2
RASSF2	Ras association (RalGDS/AF-6) domain family member 2
RASSF6	Ras association (RalGDS/AF-6) domain family member 6
RBFOX1	RNA binding protein, fox-1 homolog (C. elegans) 1	*
RBP5	retinol binding protein 5, cellular
RBPMS	RNA binding protein with multiple splicing
RCOR2	REST corepressor 2
RDH14	retinol dehydrogenase 14 (all-trans/9-cis/11-cis)
REEP5	receptor accessory protein 5
REG1A	regenerating islet-derived 1 alpha
REG3A	regenerating islet-derived 3 alpha	*
REG3G	regenerating islet-derived 3 gamma
REG4	regenerating islet-derived family, member 4
RELT	RELT tumor necrosis factor receptor
REPS2	RALBP1 associated Eps domain containing 2
RFPL1-AS1	RFPL1 antisense RNA 1
RFPL3-AS1	RFPL3 antisense RNA 1
RFX4	regulatory factor X, 4 (influences HLA class II expression)	*
RGSL1	regulator of G-protein signaling like 1
RHCE	Rh blood group, CcEe antigens	*
RHD	Rh blood group, D antigen
RHOQ	ras homolog family member Q
RHPN2	rhophilin, Rho GTPase binding protein 2
RIMS2	regulating synaptic membrane exocytosis 2
RIT2	Ras-like without CAAX 2	*
RNASE1	ribonuclease, RNase A family, 1 (pancreatic)	*
RNASE13	ribonuclease, RNase A family, 13 (non-active)
RNASE6	ribonuclease, RNase A family, k6	*
RNASE7	ribonuclease, RNase A family, 7
RNF113B	ring finger protein 113B
RNF133	ring finger protein 133
RNF135	ring finger protein 135
RNF166	ring finger protein 166
RNF212	ring finger protein 212
ROPN1B	rhophilin associated tail protein 1B	*
RORA	RAR-related orphan receptor A	*
RP2	retinitis pigmentosa 2 (X-linked recessive)
RPL10L	ribosomal protein L10-like	*
RPL13AP20	ribosomal protein L13a pseudogene 20
RPL13AP6	ribosomal protein L13a pseudogene 6
RPL23P8	ribosomal protein L23 pseudogene 8	*
RPL28	ribosomal protein L28
RPS10P7	ribosomal protein S10 pseudogene 7
RPS2P32	ribosomal protein S2 pseudogene 32
S100A12	S100 calcium binding protein A12
S100A14	S100 calcium binding protein A14
S100A4	S100 calcium binding protein A4
SBSN	suprabasin
SCAI	suppressor of cancer cell invasion
SCARNA5	small Cajal body-specific RNA 5
SCGB1C1	secretoglobin, family 1C, member 1
SCGB2A2	secretoglobin, family 2A, member 2	*
SCN2A	sodium channel, voltage-gated, type II, alpha subunit
SCN7A	sodium channel, voltage-gated, type VII, alpha subunit
SDR16C6P	short chain dehydrogenase/reductase family 16C, member 6, pseudogene	*
SEC16A	SEC16 homolog A (S. cerevisiae)
SELE	selectin E
SEMA3E	sema domain, immunoglobulin domain (Ig), short basic domain, secreted, (semaphorin) 3E
SEMA3G	sema domain, immunoglobulin domain (Ig), short basic domain, secreted, (semaphorin) 3G
SEMG1	semenogelin I	*
SEMG2	semenogelin II
2005-08-31	septin 9	*
SERINC4	serine incorporator 4
SERPINA1	serpin peptidase inhibitor, clade A (alpha-1 antiproteinase, antitrypsin), member 1	*
SGK2	serum/glucocorticoid regulated kinase 2	*
SH2D3A	SH2 domain containing 3A
SH2D4B	SH2 domain containing 4B
SH3BP5	SH3-domain binding protein 5 (BTK-associated)
SH3D19	SH3 domain containing 19
SH3KBP1	SH3-domain kinase binding protein 1	*
SHC2	SHC (Src homology 2 domain containing) transforming protein 2
SIGIRR	single immunoglobulin and toll-interleukin 1 receptor (TIR) domain
SIGLEC14	sialic acid binding Ig-like lectin 14	*
SIGLEC16	sialic acid binding Ig-like lectin 16 (gene/pseudogene)
SIGLEC17P	sialic acid binding Ig-like lectin 17, pseudogene	*
SIGLEC6	sialic acid binding Ig-like lectin 6
SIGLEC8	sialic acid binding Ig-like lectin 8
SIRPA	signal-regulatory protein alpha
SKINTL	Skint-like, pseudogene
SLC10A1	solute carrier family 10 (sodium/bile acid cotransporter family), member 1	*
SLC10A6	solute carrier family 10 (sodium/bile acid cotransporter family), member 6
SLC13A2	solute carrier family 13 (sodium-dependent dicarboxylate transporter), member 2	*
SLC17A3	solute carrier family 17 (sodium phosphate), member 3
SLC17A6	solute carrier family 17 (sodium-dependent inorganic phosphate cotransporter), member 6
SLC22A10	solute carrier family 22, member 10
SLC22A24	solute carrier family 22, member 24
SLC22A25	solute carrier family 22, member 25
SLC22A9	solute carrier family 22 (organic anion transporter), member 9
SLC23A3	solute carrier family 23 (nucleobase transporters), member 3
SLC24A2	solute carrier family 24 (sodium/potassium/calcium exchanger), member 2
SLC25A34	solute carrier family 25, member 34
SLC27A6	solute carrier family 27 (fatty acid transporter), member 6	*
SLC2A8	solute carrier family 2 (facilitated glucose transporter), member 8
SLC34A1	solute carrier family 34 (sodium phosphate), member 1	*
SLC35C1	solute carrier family 35, member C1
SLC35G5	solute carrier family 35, member G5
SLC38A5	solute carrier family 38, member 5	*
SLC39A5	solute carrier family 39 (metal ion transporter), member 5
SLC44A4	solute carrier family 44, member 4
SLC6A12	solute carrier family 6 (neurotransmitter transporter, betaine/GABA), member 12
SLC7A13	solute carrier family 7 (anionic amino acid transporter), member 13	*
SLC7A2	solute carrier family 7 (cationic amino acid transporter, y+ system), member 2	*
SLC8A2	solute carrier family 8 (sodium/calcium exchanger), member 2
SLC9A6	solute carrier family 9, subfamily A (NHE6, cation proton antiporter 6), member 6
SLCO2B1	solute carrier organic anion transporter family, member 2B1
SLPI	secretory leukocyte peptidase inhibitor
SMCP	sperm mitochondria-associated cysteine-rich protein
SMEK3P	SMEK homolog 3, suppressor of mek1 (Dictyostelium) pseudogene
SNAR-H	small ILF3/NF90-associated RNA H
SNCA	synuclein, alpha (non A4 component of amyloid precursor)
SNORA16B	small nucleolar RNA, H/ACA box 16B
SNORA38	small nucleolar RNA, H/ACA box 38
SNORA54	small nucleolar RNA, H/ACA box 54	*
SNORA64	small nucleolar RNA, H/ACA box 64
SNORA67	small nucleolar RNA, H/ACA box 67
SNORA7B	small nucleolar RNA, H/ACA box 7B
SNORD103A	small nucleolar RNA, C/D box 103A
SNORD115-10	small nucleolar RNA, C/D box 115-10
SNORD115-12	small nucleolar RNA, C/D box 115-12
SNORD115-5	small nucleolar RNA, C/D box 115-5
SNORD115-9	small nucleolar RNA, C/D box 115-9
SNORD116-12	small nucleolar RNA, C/D box 116-12	*
SNORD116-13	small nucleolar RNA, C/D box 116-13	*
SNORD116-20	small nucleolar RNA, C/D box 116-20	*
SNORD116-26	small nucleolar RNA, C/D box 116-26
SNORD116-29	small nucleolar RNA, C/D box 116-29
SNORD15B	small nucleolar RNA, C/D box 15B
SNORD32A	small nucleolar RNA, C/D box 32A
SNORD32B	small nucleolar RNA, C/D box 32B	*
SNX16	sorting nexin 16
SNX27	sorting nexin family member 27
SNX29	sorting nexin 29
SOGA1	suppressor of glucose, autophagy associated 1
SORBS1	sorbin and SH3 domain containing 1	*
SORBS2	sorbin and SH3 domain containing 2	*
SOX6	SRY (sex determining region Y)-box 6	*
SPACA5	sperm acrosome associated 5	*
SPANXB1	SPANX family, member B1
SPANXB2	SPANX family, member B2
SPANXF1	SPANX family, member F1
SPANXN2	SPANX family, member N2
SPATA16	spermatogenesis associated 16
SPATA3	spermatogenesis associated 3	*
SPATC1	spermatogenesis and centriole associated 1	*
SPIB	Spi-B transcription factor (Spi-1/PU.1 related)
SPIN2B	spindlin family, member 2B
SPINK14	serine peptidase inhibitor, Kazal type 14 (putative)	*
SPINT4	serine peptidase inhibitor, Kunitz type 4
SPN	sialophorin	*
SPPL3	signal peptide peptidase like 3
SPRR3	small proline-rich protein 3	*
SPTBN1	spectrin, beta, non-erythrocytic 1
SPTBN2	spectrin, beta, non-erythrocytic 2
SRGAP3	SLIT-ROBO Rho GTPase activating protein 3
SSX6	synovial sarcoma, X breakpoint 6 (pseudogene)	*
ST13P4	suppression of tumorigenicity 13 (colon carcinoma) (Hsp70 interacting protein) pseudogene 4
STAT5B	signal transducer and activator of transcription 5B
STK25	serine/threonine kinase 25
STMN4	stathmin-like 4	*
STRBP	spermatid perinuclear RNA binding protein
STX2	syntaxin 2
STXBP1	syntaxin binding protein 1
SULF2	sulfatase 2
SULT1A2	sulfotransferase family, cytosolic, 1A, phenol-preferring, member 2
SULT2A1	sulfotransferase family, cytosolic, 2A, dehydroepiandrosterone (DHEA)-preferring, member 1
SUN3	Sad1 and UNC84 domain containing 3
SUV420H2	suppressor of variegation 4-20 homolog 2 (Drosophila)
SV2B	synaptic vesicle glycoprotein 2B	*
SVOPL	SVOP-like	*
SYCP2L	synaptonemal complex protein 2-like	*
SYMPK	symplekin
SYN3	synapsin III
SYNE2	spectrin repeat containing, nuclear envelope 2	*
SYNGR3	synaptogyrin 3
SYNGR4	synaptogyrin 4
SYT1	synaptotagmin I
SYT3	synaptotagmin III
SYT5	synaptotagmin V
SYT8	synaptotagmin VIII
SYTL2	synaptotagmin-like 2
SZT2	seizure threshold 2 homolog (mouse)	*
TAAR1	trace amine associated receptor 1
TAAR2	trace amine associated receptor 2	*
TAAR5	trace amine associated receptor 5	*
TAAR6	trace amine associated receptor 6
TAAR8	trace amine associated receptor 8	*
TAAR9	trace amine associated receptor 9 (gene/pseudogene)	*
TAB3	TGF-beta activated kinase 1/MAP3K7 binding protein 3
TACR3	tachykinin receptor 3
TAF1L	TAF1 RNA polymerase II, TATA box binding protein (TBP)-associated factor, 210kDa-like
TAS2R39	taste receptor, type 2, member 39
TAS2R40	taste receptor, type 2, member 40
TAS2R41	taste receptor, type 2, member 41
TAS2R7	taste receptor, type 2, member 7
TCF20	transcription factor 20 (AR1)
TCP10	t-complex 10 homolog (mouse)	*
TCP10L	t-complex 10 (mouse)-like	*
TCP10L2	t-complex 10-like 2 (mouse)	*
TDRD12	tudor domain containing 12
TDRG1	testis development related 1 (non-protein coding)	*
TEX11	testis expressed 11
TGDS	TDP-glucose 4,6-dehydratase
TIMP4	TIMP metallopeptidase inhibitor 4
TKTL1	transketolase-like 1
TKTL2	transketolase-like 2
TLE2	transducin-like enhancer of split 2 (E(sp1) homolog, Drosophila)	*
TLR4	toll-like receptor 4	*
TM4SF19	transmembrane 4 L six family member 19
TMC3	transmembrane channel-like 3
TMCO5A	transmembrane and coiled-coil domains 5A
TMEFF2	transmembrane protein with EGF-like and two follistatin-like domains 2
TMEM140	transmembrane protein 140
TMEM174	transmembrane protein 174
TMEM18	transmembrane protein 18
TMEM202	transmembrane protein 202
TMEM233	transmembrane protein 233
TMEM25	transmembrane protein 25
TMEM51	transmembrane protein 51	*
TMEM72	transmembrane protein 72
TMEM74B	transmembrane protein 74B
TMEM8C	transmembrane protein 8C	*
TMPRSS3	transmembrane protease, serine 3	*
TMSB4XP8	thymosin beta 4, X-linked pseudogene 8
TNFRSF13B	tumor necrosis factor receptor superfamily, member 13B	*
TNIP2	TNFAIP3 interacting protein 2
TNP1	transition protein 1 (during histone to protamine replacement)
TOR1A	torsin family 1, member A (torsin A)
TP53TG3B	TP53 target 3B	*
TPI1P3	triosephosphate isomerase 1 pseudogene 3
TPRG1	tumor protein p63 regulated 1	*
TPTE2P1	transmembrane phosphoinositide 3-phosphatase and tensin homolog 2 pseudogene 1
TRAF2	TNF receptor-associated factor 2
TRANK1	tetratricopeptide repeat and ankyrin repeat containing 1
TREM2	triggering receptor expressed on myeloid cells 2	*
TRIM63	tripartite motif containing 63, E3 ubiquitin protein ligase
TRIM73	tripartite motif containing 73	*
TRIM74	tripartite motif containing 74
TRIM78P	tripartite motif containing 78, pseudogene	*
TRIOBP	TRIO and F-actin binding protein
TRPA1	transient receptor potential cation channel, subfamily A, member 1	*
TSKS	testis-specific serine kinase substrate
TSPO2	translocator protein 2
TSSK4	testis-specific serine kinase 4
TTBK1	tau tubulin kinase 1
TTC36	tetratricopeptide repeat domain 36
TTLL4	tubulin tyrosine ligase-like family, member 4
TTLL8	tubulin tyrosine ligase-like family, member 8
TTN	titin
TTR	transthyretin
TXNDC2	thioredoxin domain containing 2 (spermatozoa)
TYR	tyrosinase (oculocutaneous albinism IA)
UBE2N	ubiquitin-conjugating enzyme E2N
UBE2Q2P1	ubiquitin-conjugating enzyme E2Q family member 2 pseudogene 1	*
UBQLN4	ubiquilin 4
UBXN11	UBX domain protein 11
UBXN6	UBX domain protein 6
UCA1	urothelial cancer associated 1 (non-protein coding)
UCN2	urocortin 2
UCN3	urocortin 3 (stresscopin)	*
UG0898H09	uncharacterized LOC643763
UGT1A1	UDP glucuronosyltransferase 1 family, polypeptide A1	*
UGT1A7	UDP glucuronosyltransferase 1 family, polypeptide A7
UGT2B10	UDP glucuronosyltransferase 2 family, polypeptide B10
UGT2B11	UDP glucuronosyltransferase 2 family, polypeptide B11
UGT2B28	UDP glucuronosyltransferase 2 family, polypeptide B28
UGT3A2	UDP glycosyltransferase 3 family, polypeptide A2
UGT8	UDP glycosyltransferase 8
UHRF1BP1	UHRF1 binding protein 1
ULK4	unc-51-like kinase 4 (C. elegans)	*
UMODL1	uromodulin-like 1
UNC13C	unc-13 homolog C (C. elegans)	*
UNC93A	unc-93 homolog A (C. elegans)	*
UNKL	unkempt homolog (Drosophila)-like
UST	uronyl-2-sulfotransferase
UTP14A	UTP14, U3 small nucleolar ribonucleoprotein, homolog A (yeast)	*
VAMP7	vesicle-associated membrane protein 7	*
VCX2	variable charge, X-linked 2
VCX3A	variable charge, X-linked 3A
VCX3B	variable charge, X-linked 3B
VGLL1	vestigial like 1 (Drosophila)	*
VIPR2	vasoactive intestinal peptide receptor 2	*
VN1R1	vomeronasal 1 receptor 1
VN1R5	vomeronasal 1 receptor 5 (gene/pseudogene)	*
VSTM1	V-set and transmembrane domain containing 1	*
WDR38	WD repeat domain 38
WFDC10A	WAP four-disulfide core domain 10A
WFDC8	WAP four-disulfide core domain 8
WIPI2	WD repeat domain, phosphoinositide interacting 2
WNT16	wingless-type MMTV integration site family, member 16	*
WNT4	wingless-type MMTV integration site family, member 4
WWC3	WWC family member 3
XAGE2	X antigen family, member 2
XAGE3	X antigen family, member 3	*
XAGE5	X antigen family, member 5
XCL2	chemokine (C motif) ligand 2
XIRP2	xin actin-binding repeat containing 2
XKR7	XK, Kell blood group complex subunit-related family, member 7
XKRX	XK, Kell blood group complex subunit-related, X-linked	*
YIF1B	Yip1 interacting factor homolog B (S. cerevisiae)
YLPM1	YLP motif containing 1
YY2	YY2 transcription factor
ZBBX	zinc finger, B-box domain containing
ZC3H12B	zinc finger CCCH-type containing 12B
ZC4H2	zinc finger, C4H2 domain containing	*
ZCCHC13	zinc finger, CCHC domain containing 13
ZCCHC16	zinc finger, CCHC domain containing 16	*
ZCWPW2	zinc finger, CW type with PWWP domain 2	*
ZDHHC15	zinc finger, DHHC-type containing 15	*
ZDHHC18	zinc finger, DHHC-type containing 18
ZDHHC2	zinc finger, DHHC-type containing 2
ZFAND2A	zinc finger, AN1-type domain 2A
ZFR2	zinc finger RNA binding protein 2
ZMAT1	zinc finger, matrin-type 1	*
ZNF16	zinc finger protein 16
ZNF177	zinc finger protein 177
ZNF204P	zinc finger protein 204, pseudogene
ZNF208	zinc finger protein 208
ZNF222	zinc finger protein 222
ZNF233	zinc finger protein 233
ZNF285	zinc finger protein 285
ZNF292	zinc finger protein 292
ZNF311	zinc finger protein 311
ZNF323	zinc finger protein 323	*
ZNF331	zinc finger protein 331	*
ZNF354C	zinc finger protein 354C
ZNF461	zinc finger protein 461
ZNF467	zinc finger protein 467
ZNF532	zinc finger protein 532
ZNF546	zinc finger protein 546
ZNF565	zinc finger protein 565
ZNF573	zinc finger protein 573
ZNF597	zinc finger protein 597
ZNF676	zinc finger protein 676
ZNF691	zinc finger protein 691
ZNF813	zinc finger protein 813	*
ZNF878	zinc finger protein 878
ZSCAN18	zinc finger and SCAN domain containing 18	*
ZSCAN22	zinc finger and SCAN domain containing 22
ZSCAN23	zinc finger and SCAN domain containing 23
ZW10	ZW10, kinetochore associated, homolog (Drosophila)
